# Supplementary material for: The inversion of tetrahedral p-block element compounds: general trends and the relation to the second-order Jahn–Teller effect
Source: Royal Society of Chemistry journal article supplement (doi:10.1039/d1sc05395g), 2021-12-15
Supplement: d1sc05395g1.pdf [file d1sc05395g1.pdf]

# Supporting Information

## The Inversion of Tetrahedral *p*-Block Element Compounds: General Trends and the Relation to the Second-Order Jahn-Teller Effect

Lukas M. Sigmund, Rouven Maier, Lutz Greb\*

Correspondence to: [greb@uni-heidelberg.de](mailto:greb@uni-heidelberg.de)

## Table of Contents

|      |                                                                                                                         |    |
|------|-------------------------------------------------------------------------------------------------------------------------|----|
| S1.  | Computational details .....                                                                                             | 3  |
| S2.  | Inversion barriers and frontier molecular orbital energies .....                                                        | 5  |
| S3.  | T1 diagnostics .....                                                                                                    | 11 |
| S4.  | Bond lengths.....                                                                                                       | 14 |
| S5.  | Further comments on the structure optimizations and on the IRC calculations .....                                       | 15 |
| S6.  | Influence of diffuse basis functions .....                                                                              | 15 |
| S7.  | Final single point energy benchmark .....                                                                               | 16 |
| S8.  | <i>Cis/trans</i> -isomerism for the inversion transition states of <b>EH<sub>2</sub>R<sub>2</sub><sup>n</sup></b> ..... | 20 |
| S9.  | Trends in the inversion barrier height along the degree of substitution .....                                           | 21 |
| S10. | Trends in the inversion barrier height with respect to the central element.....                                         | 24 |
| S11. | Inversion transition structures of <b>EH<sub>4-y</sub>(OH)<sub>y</sub><sup>n</sup></b> .....                            | 28 |
| S12. | Comparison of HOMO-LUMO gaps and TDDFT data.....                                                                        | 31 |
| S13. | Correlation plots of inversion barrier heights against transition state HOMO-LUMO gaps .....                            | 32 |
| S14. | Natural bond orbital analyses .....                                                                                     | 36 |
| S15. | Energy decomposition analyses .....                                                                                     | 39 |
| S16. | References .....                                                                                                        | 47 |

## S1. Computational details

The Orca quantum chemistry program package<sup>1,2</sup>, version 4.2.1, was used throughout the entire project. Energy decomposition analyses were done with the Amsterdam Modeling suite (ADF 2019.304).<sup>3</sup> Computational resources were provided by the Baden-Württemberg High Performance Computing program through the bwForCluster JUSTUS2 at Ulm University. Ball and stick representations and isodensity surfaces were rendered with Chemcraft 1.8.<sup>4</sup>

Calculated energies and xyz coordinates of all considered compounds are given in a separate file.

### **Structure optimization and numerical frequency calculations at the density functional theory level**

Structure optimizations with density functional theory (DFT) were done with the DFT-D3(BJ)<sup>5,6</sup> version of the B97M-V functional<sup>7</sup> (B97M-D3(BJ)) as it was extended by Najibi and Goerigk<sup>8</sup>. The cc-pVTZ basis set was used (H, B, C, N, O, F<sup>9</sup>; Al, Si, P, Cl<sup>10</sup>; Ga, Ge, As, Br<sup>11</sup>). For iodine, the ECP-based version with weighted core functions, that is cc-pwCVTZ-PP along with the SK-MCDHF-RSC pseudo potential was employed.<sup>12</sup> The integration grid was set to the `Grid7 NoFinalGrid` option and SCF convergence was achieved with `VeryTightSCF` and `ConvCheckMode = 0`. For the structural convergence criteria, the parameters of the `VeryTightOpt` keyword were used (`TolE 2e-7`, `TolRMSG 8e-6`, `TolMaxG 3e-5`, `TolRMSD 1e-4`, and `TolMaxD 2e-4`). All optimizations were carried out with redundant internal coordinates. For the optimizations of the planar structures (inversion transition states), the two *trans*-valence angles of the central element were added manually (with an initial value of 180 °) to allow for a proper description of the planar states and of the inversion mode.

All obtained structures were evaluated by means of numerical frequency calculations. The numerical increment was decreased to 0.0005 Bohr and `VeryTight` SCF convergence criteria were applied.

### **Intrinsic reaction coordinate calculations**

Calculations of the intrinsic reaction coordinate (IRC) of the inversion process were done on the exact same level of theory as applied for the structural optimizations (see above). Both directions of the IRC were investigated. The convergence criteria were significantly tightened to `TolRMSG 8e-6` and `TolMaxG 3e-5`. Except for that, the default settings for IRC calculations as implemented in Orca were used. All silicon-containing structures were investigated (46 inversion transition states).

### **Single point calculations at the DLPNO-CCSD(T) level**

The molecular structures obtained from the DFT structure optimizations were used for single point calculations with domain-based local pair natural orbital coupled cluster theory (DLPNO-CCSD(T)).<sup>13-16</sup> `TightPNO` settings were chosen throughout. The cc-pVQZ basis set was used and required auxiliary basis functions were generated with the `AutoAux` keyword.<sup>17</sup> For iodine, the ECP-based version with weighted core functions, that is cc-pwCVQZ-PP along with the SK-MCDHF-RSC pseudo potential was employed.<sup>12</sup> SCF convergence was achieved with `VeryTightSCF` and `ConvCheckMode = 0`.

### **Time-dependent density functional calculations**

Time-dependent density functional theory (TDDFT) calculations were done for a subset of the investigated inversion transition structures to compare the differences between the first vertical excitation energy (obtained from TDDFT) and the HOMO-LUMO gap (obtained from the structure optimizations). The results are shown in Chapter S12. The B97M-D3(BJ) functional and the cc-pVTZ basis set was used as described above. The same integration grid and identical SCF settings were used as for the structure optimizations. The `MaxDim` and the `NRroots` parameter were both set to 5. It was ensured that lowest-energy excited singlet state predominantly (> 95%) resulted from an electronic excitation from the  $b_{1g}$  (HOMO) to the  $a_{2u}$  (LUMO) molecular orbital.

### **Natural bond orbital analyses**

Natural bond orbital (NBO) analyses were done with the NBO7 program (NBO 7.0. E. D. Glendening, J. K. Badenhoop, A. E. Reed, J. E. Carpenter, J. A. Bohmann, C. M. Morales, P. Karafiloglou, C. R. Landis, and F. Weinhold, Theoretical Chemistry Institute, University of Wisconsin, Madison, WI (2018)), which is applicable within Orca. The PBE0 functional<sup>18</sup> and the def2-TZVPP<sup>19</sup> (for all elements) was used. All default settings were applied. NBO analyses were carried out for all ground and inversion transition states of  $\text{ER}_4^n$  with  $\text{E}^n = \text{Al}^-, \text{Si}, \text{P}^+, \text{Ga}^-, \text{Ge}, \text{As}^+$  and  $\text{R} = \text{F}, \text{Cl}, \text{Br}, \text{I}, \text{OH}, \text{NH}_2, \text{CH}_3, \text{CN}, \text{CCH}$  (see Chapter S14).

### Energy decomposition analyses

For energy decomposition analyses (EDA)<sup>20-22</sup>, the BP86<sup>23</sup> functional with D3(BJ) correction was used together with the TZ2P basis set<sup>24</sup> as implemented in ADF. The ZORA formalism was applied.<sup>25</sup> The frozen core approximation was turned off and the numerical quality was set to `good`. A strictly closed-shell fragmentation scheme was chosen as illustrated in Figure S29. EDAs were carried out for all ground and inversion transition states of  $\text{ER}_4^n$  with  $\text{E}^n = \text{Al}^-, \text{Si}, \text{P}^+, \text{Ga}^-, \text{Ge}, \text{As}^+$  and  $\text{R} = \text{H}, \text{F}, \text{Cl}, \text{Br}, \text{I}, \text{OH}, \text{NH}_2, \text{CH}_3, \text{CN}, \text{CCH}$ .

For  $\text{SiH}_4$  and  $\text{SiF}_4$ , the EDA was repeated with the QZ4P basis set, and a numerical quality of `very good`. The individual energy contributions into an angular and radial portion were dissected, as it is illustrated in the main article in Table 2. The results are given in Chapter S15.

### Quantum theory of atoms in molecules calculations

Quantum theory of atoms in molecules (QTAIM) topological analyses was performed on the electron densities computed with the PBE0 functional and a def2-TZVPP basis set, `Grid6` and `TightSCF`, and were analyzed with AIMAll, Version 19.10.12, using the default settings.<sup>26</sup>

### Complete active space self-consistent field and N-electron valence state perturbation theory calculations

It was not possible to calculate proper inversion transition structures for  $\text{PH}_4^+$  and  $\text{AsH}_4^+$  with the applied DFT method. So, these molecules were further explored with *ab initio* calculations. The ground and inversion transition structure were reoptimized with the complete active space self-consistent field (CASSCF<sup>27</sup>) method. The cc-pVTZ basis set was used. The same SCF and structural convergence criteria as for the DFT optimizations were applied. The same holds for the numerical increment of the frequency calculations. The final single point energies were calculated based on the strongly contracted version of the N-electron valence state perturbation theory (NEVPT2<sup>28-31</sup>). For those calculations, the larger cc-pVQZ basis set was used. The same SCF convergence criteria as for the CASSCF calculations were applied. Except for the mentioned changes, the default CASSCF and NEVPT2 settings of Orca were used.

For all calculations, the active space comprised the entire valence space of the compounds, that is the (highest energy) *s*- and three *p*-orbitals of the central element and the four *s*-orbitals of the hydrogen atoms (CAS(8e,8o)). As initial guess for the CASSCF structural optimizations, orbitals from a Hartree-Fock single point energy calculation (cc-pVTZ basis set) were used. With that computational procedure, it was found that the open-shell singlet configuration (singly occupied  $a_{2u}$  and  $b_{1g}$  molecular orbitals) of  $\text{PH}_4^+$  and  $\text{AsH}_4^+$  in the square-planar state are valid inversion transition states with only a single imaginary frequency of  $B_{2u}$  symmetry. Inversion barrier heights of 499.5 ( $\text{PH}_4^+$ ) and 498.2  $\text{kJ mol}^{-1}$  ( $\text{AsH}_4^+$ ) were obtained. The active space composition is exemplarily shown for  $\text{PH}_4^+$  in Figure S1.

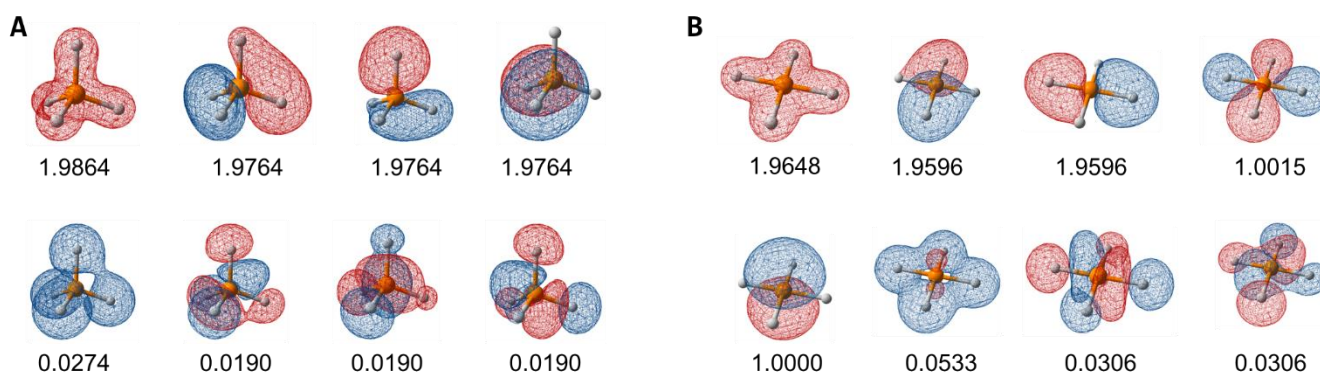

**Figure S1:** Isodensity surface representations and natural orbital occupation numbers of the active molecular orbitals of  $\text{PH}_4^+$  for **A)** its ground und **B)** its inversion transition state, obtained on the CASSCF/cc-pVTZ level of theory.

## S2. Inversion barriers and frontier molecular orbital energies

**Table S1:** Inversion barriers, frontier molecular orbital energies, and energy differences of ground and transition state of all considered compounds  $\text{EH}_{4-y}\text{R}_y^n$  with  $\text{E}^n = \text{Al}^-, \text{Si}, \text{P}^+, \text{Ga}^-, \text{Ge}, \text{As}^+$ ;  $\text{R} = \text{F}, \text{Cl}, \text{Br}, \text{I}, \text{OH}, \text{NH}_2, \text{CH}_3, \text{CN}, \text{CCH}$ , and  $y = 0, 1, 2, 3, 4$  calculated at the B97M-D3(BJ)/cc-pVTZ and the DLPNO-CCSD(T)/cc-pVQZ//B97M-D3(BJ)/cc-pVTZ level of theory. The orbital energies were obtained from the DFT calculations. For further discussions on the structure optimizations, see Chapter S5.

| Compound                                         | Inversion barrier [kJ mol <sup>-1</sup> ] (B97M-D3(BJ)/cc-pVTZ) | Inversion barrier [kJ mol <sup>-1</sup> ] (DLPNO-CCSD(T)/cc-pVQZ) | Ground state HOMO energy [eV] | Ground state LUMO energy [eV] | Ground state HOMO-LUMO gap [eV] | Transition state HOMO energy [eV] | Transition state LUMO energy [eV] | Transition state HOMO-LUMO gap [eV] |
|--------------------------------------------------|-----------------------------------------------------------------|-------------------------------------------------------------------|-------------------------------|-------------------------------|---------------------------------|-----------------------------------|-----------------------------------|-------------------------------------|
| <b>Aluminum</b>                                  |                                                                 |                                                                   |                               |                               |                                 |                                   |                                   |                                     |
| $\text{AlH}_4^-$                                 | 219.14                                                          | 224.75                                                            | -1.5524                       | 5.5542                        | 7.1066                          | 0.6246                            | 2.7112                            | 2.0866                              |
| $\text{AlH}_3\text{F}^-$                         | 176.66                                                          | 181.74                                                            | -1.4291                       | 4.9834                        | 6.4125                          | -0.1389                           | 3.2283                            | 3.3672                              |
| $\text{AlH}_3\text{Cl}^-$                        | 179.05                                                          | 180.00                                                            | -1.7738                       | 4.6916                        | 6.4654                          | -0.5745                           | 2.6227                            | 3.1972                              |
| $\text{AlH}_3\text{Br}^-$                        | 174.28                                                          | 172.82                                                            | -1.8369                       | 4.4055                        | 6.2424                          | -0.7786                           | 2.3727                            | 3.1513                              |
| $\text{AlH}_3\text{I}^-$                         | 170.44                                                          | 161.20                                                            | -1.6981                       | 4.2042                        | 5.9023                          | -0.8454                           | 2.0992                            | 2.9446                              |
| $\text{AlH}_3(\text{OH})^-$                      | 155.84                                                          | 161.26                                                            | -0.9833                       | 4.7460                        | 5.7293                          | -0.0368                           | 3.4201                            | 3.4569                              |
| $\text{AlH}_3(\text{NH}_2)^-$                    | 144.89                                                          | 150.28                                                            | -0.5322                       | 4.6824                        | 5.2146                          | 0.1610                            | 3.6960                            | 3.5350                              |
| $\text{AlH}_3(\text{CH}_3)^-$                    | 208.00                                                          | 213.24                                                            | -1.4338                       | 4.7184                        | 6.1522                          | 0.4584                            | 2.9629                            | 2.5045                              |
| $\text{AlH}_3(\text{CN})^-$                      | 204.10                                                          | 205.43                                                            | -2.2858                       | 4.3674                        | 6.6532                          | -0.5965                           | 1.9790                            | 2.5755                              |
| $\text{AlH}_3(\text{CCH})^-$                     | 206.52                                                          | 210.33                                                            | -1.676                        | 4.5918                        | 6.2678                          | -0.0655                           | 2.4305                            | 2.4960                              |
| $\text{AlH}_2\text{F}_2^-$ ( <i>cis</i> )        | 173.05                                                          | 179.94                                                            | -1.4066                       | 5.3920                        | 6.7986                          | -0.4062                           | 3.6549                            | 4.0611                              |
| $\text{AlH}_2\text{F}_2^-$ ( <i>trans</i> )      | 155.37                                                          | 161.90                                                            | -1.4066                       | 5.3920                        | 6.7986                          | -0.8908                           | 3.8287                            | 4.7195                              |
| $\text{AlH}_2\text{Cl}_2^-$ ( <i>cis</i> )       | 176.04                                                          | 179.76                                                            | -2.0442                       | 4.7932                        | 6.8374                          | -1.0813                           | 2.6706                            | 3.7519                              |
| $\text{AlH}_2\text{Cl}_2^-$ ( <i>trans</i> )     | 147.48                                                          | 144.83                                                            | -2.0442                       | 4.7932                        | 6.8374                          | -1.7388                           | 2.6466                            | 4.3854                              |
| $\text{AlH}_2\text{Br}_2^-$ ( <i>cis</i> )       | 172.06                                                          | 175.40                                                            | -2.1738                       | 4.4039                        | 6.5777                          | -1.2539                           | 2.3265                            | 3.5804                              |
| $\text{AlH}_2\text{Br}_2^-$ ( <i>trans</i> )     | 139.33                                                          | 134.28                                                            | -2.1738                       | 4.4039                        | 6.5777                          | -1.8570                           | 2.2587                            | 4.1157                              |
| $\text{AlH}_2\text{I}_2^-$ ( <i>cis</i> )        | 169.31                                                          | 170.00                                                            | -2.0891                       | 3.8974                        | 5.9865                          | -1.2431                           | 1.9734                            | 3.2165                              |
| $\text{AlH}_2\text{I}_2^-$ ( <i>trans</i> )      | 135.22                                                          | 124.29                                                            | -2.0891                       | 3.8974                        | 5.9865                          | -1.7327                           | 1.8702                            | 3.6029                              |
| $\text{AlH}_2(\text{OH})_2^-$ ( <i>cis</i> )     | 136.64                                                          | 141.27                                                            | -1.0693                       | 4.9675                        | 6.0368                          | -0.2508                           | 4.0158                            | 4.2666                              |
| $\text{AlH}_2(\text{OH})_2^-$ ( <i>trans</i> )   | 123.73                                                          | 128.53                                                            | -1.0693                       | 4.9675                        | 6.0368                          | -0.7183                           | 4.2422                            | 4.9605                              |
| $\text{AlH}_2(\text{NH}_2)_2^-$ ( <i>cis</i> )   | 124.59                                                          | 126.18                                                            | -0.4512                       | 4.8474                        | 5.2986                          | 0.0307                            | 4.4971                            | 4.4664                              |
| $\text{AlH}_2(\text{NH}_2)_2^-$ ( <i>trans</i> ) | 101.46                                                          | 103.42                                                            | -0.4512                       | 4.8474                        | 5.2986                          | -0.5075                           | 4.8015                            | 5.3090                              |
| $\text{AlH}_2(\text{CH}_3)_2^-$ ( <i>cis</i> )   | 205.67                                                          | 209.20                                                            | -1.3379                       | 4.7504                        | 6.0883                          | 0.3912                            | 3.2315                            | 2.8403                              |
| $\text{AlH}_2(\text{CH}_3)_2^-$ ( <i>trans</i> ) | 199.62                                                          | 205.30                                                            | -1.3379                       | 4.7504                        | 6.0883                          | 0.2944                            | 3.2564                            | 2.9620                              |
| $\text{AlH}_2(\text{CN})_2^-$ ( <i>cis</i> )     | 194.37                                                          | 196.63                                                            | -2.9582                       | 3.4117                        | 6.3699                          | -1.6335                           | 1.2807                            | 2.9142                              |
| $\text{AlH}_2(\text{CN})_2^-$ ( <i>trans</i> )   | 185.49                                                          | 182.23                                                            | -2.9582                       | 3.4117                        | 6.3699                          | -2.0851                           | 1.2834                            | 3.3685                              |
| $\text{AlH}_2(\text{CCH})_2^-$ ( <i>cis</i> )    | 197.79                                                          | 202.24                                                            | -1.8096                       | 4.0837                        | 5.8933                          | -0.6207                           | 2.1994                            | 2.8201                              |
| $\text{AlH}_2(\text{CCH})_2^-$ ( <i>trans</i> )  | 194.39                                                          | 195.62                                                            | -1.8096                       | 4.0837                        | 5.8933                          | -1.0394                           | 2.1898                            | 3.2292                              |
| $\text{AlHF}_3^-$                                | 167.84                                                          | 176.60                                                            | -2.2136                       | 5.9064                        | 8.1200                          | -1.3779                           | 4.2268                            | 5.6047                              |
| $\text{AlHCl}_3^-$                               | 165.36                                                          | 167.77                                                            | -2.7986                       | 5.0759                        | 7.8745                          | -2.0433                           | 2.7489                            | 4.7922                              |
| $\text{AlHBr}_3^-$                               | 158.88                                                          | 160.34                                                            | -2.8331                       | 4.2843                        | 7.1174                          | -2.1040                           | 2.2641                            | 4.3681                              |
| $\text{AlI}_3^-$                                 | 155.02                                                          | 153.41                                                            | -2.3759                       | 3.3577                        | 5.7336                          | -1.8652                           | 1.7666                            | 3.6318                              |
| $\text{AlH}(\text{OH})_3^-$                      | 117.72                                                          | 121.88                                                            | -1.2726                       | 5.0327                        | 6.3053                          | -0.8917                           | 4.7257                            | 5.6174                              |
| $\text{AlH}(\text{NH}_2)_3^-$                    | 109.97                                                          | 107.10                                                            | -0.4055                       | 4.7666                        | 5.1721                          | -0.0237                           | 4.6882                            | 4.7119                              |
| $\text{AlH}(\text{CH}_3)_3^-$                    | 205.24                                                          | 208.54                                                            | -1.2996                       | 4.5647                        | 5.8643                          | 0.3344                            | 3.4682                            | 3.1338                              |
| $\text{AlH}(\text{CN})_3^-$                      | 180.89                                                          | 181.95                                                            | -3.9004                       | 2.6620                        | 6.5624                          | -2.9388                           | 0.6260                            | 3.5648                              |

|                                                                                |        |        |         |        |        |         |        |        |
|--------------------------------------------------------------------------------|--------|--------|---------|--------|--------|---------|--------|--------|
| AlH(CCH) <sub>3</sub> <sup>-</sup>                                             | 189.46 | 193.03 | -2.2514 | 3.7645 | 6.0159 | -1.4264 | 1.9934 | 3.4198 |
| AlF <sub>4</sub> <sup>-</sup>                                                  | 180.52 | 191.17 | -3.7330 | 5.2939 | 9.0269 | -2.4367 | 3.9009 | 6.3376 |
| AlCl <sub>4</sub> <sup>-</sup>                                                 | 178.09 | 182.70 | -3.3874 | 4.5367 | 7.9241 | -2.3214 | 2.6057 | 4.9271 |
| AlBr <sub>4</sub> <sup>-</sup>                                                 | 171.61 | 175.78 | -3.1292 | 3.6576 | 6.7868 | -2.1450 | 1.9474 | 4.0924 |
| AlI <sub>4</sub> <sup>-</sup>                                                  | 167.74 | 169.34 | -2.6343 | 2.6865 | 5.3208 | -1.7244 | 1.3072 | 3.0316 |
| Al(OH) <sub>4</sub> <sup>-</sup>                                               | 113.11 | 116.07 | -1.4628 | 4.7418 | 6.2046 | -1.0658 | 4.3609 | 5.4267 |
| Al(NH <sub>2</sub> ) <sub>4</sub> <sup>-</sup>                                 | 120.64 | 115.78 | -0.1811 | 4.4931 | 4.6742 | 0.1363  | 4.3751 | 4.2388 |
| Al(CH <sub>3</sub> ) <sub>4</sub> <sup>-</sup>                                 | 211.40 | 213.25 | -1.2804 | 4.2899 | 5.5703 | 0.3400  | 3.7306 | 3.3906 |
| Al(CN) <sub>4</sub> <sup>-</sup>                                               | 173.03 | 175.86 | -5.1094 | 1.9873 | 7.0967 | -4.2702 | 0.0228 | 4.2930 |
| Al(CCH) <sub>4</sub> <sup>-</sup>                                              | 185.30 | 189.64 | -2.668  | 3.5292 | 6.1972 | -2.0846 | 1.8181 | 3.9027 |
| <b>Gallium</b>                                                                 |        |        |         |        |        |         |        |        |
| GaH <sub>4</sub> <sup>-</sup>                                                  | 261.95 | 290.62 | -1.4344 | 5.8583 | 7.2927 | 1.0023  | 2.5329 | 1.5306 |
| GaH <sub>3</sub> F <sup>-</sup>                                                | 193.87 | 209.49 | -1.4405 | 5.0239 | 6.4644 | 0.0371  | 2.9374 | 2.9003 |
| GaH <sub>3</sub> Cl <sup>-</sup>                                               | 187.30 | 188.99 | -1.7221 | 4.5991 | 6.3212 | -0.6529 | 2.0455 | 2.6984 |
| GaH <sub>3</sub> Br <sup>-</sup>                                               | 173.98 | 158.65 | -1.7184 | 4.3032 | 6.0216 | -0.4043 | 1.3008 | 1.7051 |
| GaH <sub>3</sub> I <sup>-</sup>                                                | 162.52 | 131.45 | -1.5124 | 4.0878 | 5.6002 | -0.2437 | 0.9756 | 1.2193 |
| GaH <sub>3</sub> (OH) <sup>-</sup>                                             | 179.07 | 198.56 | -0.7744 | 4.8613 | 5.6357 | 0.2765  | 3.1479 | 2.8714 |
| GaH <sub>3</sub> (NH <sub>2</sub> ) <sup>-</sup>                               | 180.43 | 201.03 | -0.4449 | 4.7943 | 5.2392 | 0.4812  | 3.4775 | 2.9963 |
| GaH <sub>3</sub> (CH <sub>3</sub> ) <sup>-</sup>                               | 243.99 | 271.02 | -1.2977 | 4.8301 | 6.1278 | 0.8381  | 2.7208 | 1.8827 |
| GaH <sub>3</sub> (CN) <sup>-</sup>                                             | 237.22 | 232.84 | -2.2657 | 4.7453 | 7.0110 | -0.4518 | 1.0803 | 1.5321 |
| GaH <sub>3</sub> (CCH) <sup>-</sup>                                            | 246.50 | 271.25 | -1.5984 | 4.9204 | 6.5188 | 0.1705  | 2.2109 | 2.0404 |
| GaH <sub>2</sub> F <sub>2</sub> <sup>-</sup> ( <i>cis</i> )                    | 173.68 | 189.86 | -1.6407 | 5.2753 | 6.9160 | -0.5473 | 3.2646 | 3.8119 |
| GaH <sub>2</sub> F <sub>2</sub> <sup>-</sup> ( <i>trans</i> )                  | 146.13 | 157.35 | -1.6407 | 5.2753 | 6.9160 | -1.4139 | 3.3537 | 4.7676 |
| GaH <sub>2</sub> Cl <sub>2</sub> <sup>-</sup> ( <i>cis</i> )                   | 187.06 | 202.91 | -2.1427 | 4.5329 | 6.6756 | -1.1521 | 2.2799 | 3.4320 |
| GaH <sub>2</sub> Cl <sub>2</sub> <sup>-</sup> ( <i>trans</i> )                 | 134.01 | 137.28 | -2.1427 | 4.5329 | 6.6756 | -1.9173 | 2.1311 | 4.0484 |
| GaH <sub>2</sub> Br <sub>2</sub> <sup>-</sup> ( <i>cis</i> )                   | 186.13 | 200.77 | -2.1809 | 3.9746 | 6.1555 | -1.2697 | 1.9656 | 3.2353 |
| GaH <sub>2</sub> Br <sub>2</sub> <sup>-</sup> ( <i>trans</i> )                 | 129.24 | 128.55 | -2.1809 | 3.9746 | 6.1555 | -1.9228 | 1.7808 | 3.7036 |
| GaH <sub>2</sub> I <sub>2</sub> <sup>-</sup> ( <i>cis</i> )                    | 187.41 | 196.57 | -2.0041 | 3.4000 | 5.4041 | -1.1912 | 1.6774 | 2.8686 |
| GaH <sub>2</sub> I <sub>2</sub> <sup>-</sup> ( <i>trans</i> )                  | 131.75 | 119.59 | -2.0041 | 3.4000 | 5.4041 | -1.6899 | 1.4623 | 3.1522 |
| GaH <sub>2</sub> (OH) <sub>2</sub> <sup>-</sup> ( <i>cis</i> )                 | 143.65 | 161.30 | -1.048  | 4.9820 | 6.0300 | -0.1515 | 3.6595 | 3.8110 |
| GaH <sub>2</sub> (OH) <sub>2</sub> <sup>-</sup> ( <i>trans</i> )               | 133.76 | 149.18 | -1.048  | 4.9820 | 6.0300 | -0.423  | 3.7938 | 4.2168 |
| GaH <sub>2</sub> (NH <sub>2</sub> ) <sub>2</sub> <sup>-</sup> ( <i>cis</i> )   | 152.81 | 168.26 | -0.524  | 4.8236 | 5.3476 | 0.3009  | 4.005  | 3.7041 |
| GaH <sub>2</sub> (NH <sub>2</sub> ) <sub>2</sub> <sup>-</sup> ( <i>trans</i> ) | 136.54 | 151.43 | -0.524  | 4.8236 | 5.3476 | 0.1361  | 4.2766 | 4.1405 |
| GaH <sub>2</sub> (CH <sub>3</sub> ) <sub>2</sub> <sup>-</sup> ( <i>cis</i> )   | 237.09 | 260.53 | -1.2047 | 4.7971 | 6.0018 | 0.7989  | 2.9583 | 2.1594 |
| GaH <sub>2</sub> (CH <sub>3</sub> ) <sub>2</sub> <sup>-</sup> ( <i>trans</i> ) | 228.15 | 256.95 | -1.2047 | 4.7971 | 6.0018 | 0.6869  | 2.9643 | 2.2774 |
| GaH <sub>2</sub> (CN) <sub>2</sub> <sup>-</sup> ( <i>cis</i> )                 | 235.99 | 258.82 | -3.0303 | 3.7631 | 6.7934 | -1.4494 | 1.0506 | 2.5000 |
| GaH <sub>2</sub> (CN) <sub>2</sub> <sup>-</sup> ( <i>trans</i> )               | 212.12 | 225.83 | -3.0303 | 3.7631 | 6.7934 | -2.0168 | 1.0092 | 3.0260 |
| GaH <sub>2</sub> (CCH) <sub>2</sub> <sup>-</sup> ( <i>cis</i> )                | 238.39 | 264.94 | -1.797  | 4.3699 | 6.1669 | -0.4037 | 1.962  | 2.3657 |
| GaH <sub>2</sub> (CCH) <sub>2</sub> <sup>-</sup> ( <i>trans</i> )              | 228.09 | 249.27 | -1.797  | 4.3699 | 6.1669 | -0.9308 | 1.9278 | 2.8586 |
| GaHF <sub>3</sub> <sup>-</sup>                                                 | 147.31 | 163.21 | -2.6070 | 5.1707 | 7.7777 | -1.7588 | 3.6708 | 5.4296 |
| GaHCl <sub>3</sub> <sup>-</sup>                                                | 157.58 | 169.94 | -2.9203 | 3.9922 | 6.9125 | -2.2178 | 2.2563 | 4.4741 |
| GaHBr <sub>3</sub> <sup>-</sup>                                                | 156.02 | 165.78 | -2.8031 | 3.2509 | 6.0540 | -2.1954 | 1.8338 | 4.0292 |
| GaHI <sub>3</sub> <sup>-</sup>                                                 | 158.79 | 161.31 | -2.3469 | 2.5220 | 4.8689 | -1.9216 | 1.4325 | 3.3541 |
| GaH(OH) <sub>3</sub> <sup>-</sup>                                              | 114.87 | 130.83 | -1.2529 | 4.7510 | 6.0039 | -0.7567 | 4.2779 | 5.0346 |
| GaH(NH <sub>2</sub> ) <sub>3</sub> <sup>-</sup>                                | 130.49 | 142.86 | -0.5722 | 4.6346 | 5.2068 | 0.0646  | 4.4313 | 4.3667 |
| GaH(CH <sub>3</sub> ) <sub>3</sub> <sup>-</sup>                                | 230.11 | 254.66 | -1.1686 | 4.5804 | 5.7490 | 0.7481  | 3.195  | 2.4469 |
| GaH(CN) <sub>3</sub> <sup>-</sup>                                              | 217.97 | 239.04 | -3.9914 | 2.9759 | 6.9673 | -2.7860 | 0.3386 | 3.1246 |
| GaH(CCH) <sub>3</sub> <sup>-</sup>                                             | 226.12 | 252.01 | -2.2563 | 3.9988 | 6.2551 | -1.3251 | 1.7204 | 3.0455 |
| GaF <sub>4</sub> <sup>-</sup>                                                  | 142.44 | 161.07 | -3.8408 | 4.1008 | 7.9416 | -2.7590 | 3.1673 | 5.9263 |
| GaCl <sub>4</sub> <sup>-</sup>                                                 | 164.09 | 179.54 | -3.4693 | 3.1434 | 6.6127 | -2.5014 | 1.6436 | 4.1450 |

|                                                                   |        |        |          |         |         |         |         |        |
|-------------------------------------------------------------------|--------|--------|----------|---------|---------|---------|---------|--------|
| GaBr <sub>4</sub> <sup>-</sup>                                    | 163.84 | 176.39 | -3.1902  | 2.3811  | 5.5713  | -2.2857 | 1.0381  | 3.3238 |
| GaI <sub>4</sub> <sup>-</sup>                                     | 168.02 | 173.25 | -2.6680  | 1.6841  | 4.3521  | -1.8209 | 0.5219  | 2.3428 |
| Ga(OH) <sub>4</sub> <sup>-</sup>                                  | 92.08  | 108.12 | -1.5904  | 4.2569  | 5.8473  | -1.2225 | 3.9222  | 5.1447 |
| Ga(NH <sub>2</sub> ) <sub>4</sub> <sup>-</sup>                    | 126.63 | 137.33 | -0.3440  | 4.2387  | 4.5827  | -0.0428 | 4.0808  | 4.1236 |
| Ga(CH <sub>3</sub> ) <sub>4</sub> <sup>-</sup>                    | 235.45 | 256.81 | -1.1406  | 4.2897  | 5.4303  | 0.8320  | 3.3589  | 2.5269 |
| Ga(CN) <sub>4</sub> <sup>-</sup>                                  | 212.04 | 235.08 | -5.0401  | 2.1958  | 7.2359  | -3.8630 | -0.3009 | 3.5621 |
| Ga(CCH) <sub>4</sub> <sup>-</sup>                                 | 221.51 | 247.74 | -2.7237  | 3.6927  | 6.4164  | -2.1953 | 1.5238  | 3.7191 |
| <b>Silicon</b>                                                    |        |        |          |         |         |         |         |        |
| SiH <sub>4</sub>                                                  | 364.28 | 380.08 | -9.0306  | 0.3463  | 9.3769  | -5.5586 | -4.4689 | 1.0897 |
| SiH <sub>3</sub> F                                                | 265.84 | 280.76 | -8.8366  | -0.7443 | 8.0923  | -6.9366 | -3.8247 | 3.1119 |
| SiH <sub>3</sub> Cl                                               | 280.01 | 292.80 | -8.2103  | -0.7207 | 7.4896  | -6.7627 | -4.2307 | 2.5320 |
| SiH <sub>3</sub> Br                                               | 278.69 | 291.22 | -7.7418  | -0.9693 | 6.7725  | -6.6453 | -4.3037 | 2.3416 |
| SiH <sub>3</sub> I                                                | 279.05 | 290.46 | -7.0145  | -1.2743 | 5.7402  | -6.3170 | -4.2922 | 2.0248 |
| SiH <sub>3</sub> (OH)                                             | 245.90 | 261.65 | -7.7538  | -0.5188 | 7.2350  | -6.4275 | -3.2606 | 3.1669 |
| SiH <sub>3</sub> (NH <sub>2</sub> )                               | 220.06 | 235.74 | -6.5771  | -0.2191 | 6.3580  | -5.9551 | -2.6767 | 3.2784 |
| SiH <sub>3</sub> (CH <sub>3</sub> )                               | 344.74 | 361.58 | -8.4250  | 0.0902  | 8.5152  | -5.4075 | -3.7674 | 1.6401 |
| SiH <sub>3</sub> (CN)                                             | 332.83 | 347.47 | -8.8911  | -1.4644 | 7.4267  | -6.7433 | -5.0817 | 1.6616 |
| SiH <sub>3</sub> (CCH)                                            | 328.68 | 347.88 | -7.4547  | -0.8725 | 6.5822  | -5.9002 | -4.2028 | 1.6974 |
| SiH <sub>2</sub> F <sub>2</sub> ( <i>cis</i> )                    | 249.87 | 267.56 | -8.8776  | -0.2541 | 8.6235  | -7.4541 | -3.3517 | 4.1024 |
| SiH <sub>2</sub> F <sub>2</sub> ( <i>trans</i> )                  | 212.10 | 225.12 | -8.8776  | -0.2541 | 8.6235  | -8.1524 | -3.0833 | 5.0691 |
| SiH <sub>2</sub> Cl <sub>2</sub> ( <i>cis</i> )                   | 262.20 | 276.29 | -8.2472  | -0.5550 | 7.6922  | -7.0229 | -3.9948 | 3.0281 |
| SiH <sub>2</sub> Cl <sub>2</sub> ( <i>trans</i> )                 | 219.07 | 228.07 | -8.2472  | -0.5550 | 7.6922  | -7.5561 | -3.9432 | 3.6129 |
| SiH <sub>2</sub> Br <sub>2</sub> ( <i>cis</i> )                   | 257.91 | 271.93 | -7.8254  | -1.1798 | 6.6456  | -6.7606 | -4.1100 | 2.6506 |
| SiH <sub>2</sub> Br <sub>2</sub> ( <i>trans</i> )                 | 215.97 | 224.90 | -7.8254  | -1.1798 | 6.6456  | -7.1945 | -4.0784 | 3.1161 |
| SiH <sub>2</sub> I <sub>2</sub> ( <i>cis</i> )                    | 253.52 | 267.86 | -6.9619  | -1.8303 | 5.1316  | -6.2178 | -4.1288 | 2.0890 |
| SiH <sub>2</sub> I <sub>2</sub> ( <i>trans</i> )                  | 218.02 | 225.54 | -6.9619  | -1.8303 | 5.1316  | -6.5680 | -4.1022 | 2.4658 |
| SiH <sub>2</sub> (OH) <sub>2</sub> ( <i>cis</i> )                 | 213.34 | 229.97 | -7.8666  | 0.0018  | 7.8684  | -6.6818 | -2.3525 | 4.3293 |
| SiH <sub>2</sub> (OH) <sub>2</sub> ( <i>trans</i> )               | 186.98 | 198.16 | -7.8666  | 0.0018  | 7.8684  | -7.6153 | -1.959  | 5.6563 |
| SiH <sub>2</sub> (NH <sub>2</sub> ) <sub>2</sub> ( <i>cis</i> )   | 184.09 | 196.74 | -6.3522  | 0.4962  | 6.8484  | -6.0499 | -1.4143 | 4.6356 |
| SiH <sub>2</sub> (NH <sub>2</sub> ) <sub>2</sub> ( <i>trans</i> ) | 143.40 | 152.50 | -6.3522  | 0.4962  | 6.8484  | -6.6294 | -0.9126 | 5.7168 |
| SiH <sub>2</sub> (CH <sub>3</sub> ) <sub>2</sub> ( <i>cis</i> )   | 340.03 | 355.56 | -7.9863  | 0.4322  | 8.4185  | -5.2333 | -3.2126 | 2.0207 |
| SiH <sub>2</sub> (CH <sub>3</sub> ) <sub>2</sub> ( <i>trans</i> ) | 330.78 | 347.35 | -7.9863  | 0.4322  | 8.4185  | -5.3175 | -3.1141 | 2.2034 |
| SiH <sub>2</sub> (CN) <sub>2</sub> ( <i>cis</i> )                 | 306.78 | 325.77 | -9.2935  | -2.3937 | 6.8998  | -7.7146 | -5.6022 | 2.1124 |
| SiH <sub>2</sub> (CN) <sub>2</sub> ( <i>trans</i> )               | 297.31 | 309.94 | -9.2935  | -2.3937 | 6.8998  | -8.0462 | -5.6075 | 2.4387 |
| SiH <sub>2</sub> (CCH) <sub>2</sub> ( <i>cis</i> )                | 302.90 | 326.21 | -7.3294  | -1.1557 | 6.1737  | -6.1721 | -4.0196 | 2.1525 |
| SiH <sub>2</sub> (CCH) <sub>2</sub> ( <i>trans</i> )              | 298.65 | 317.17 | -7.3294  | -1.1557 | 6.1737  | -6.5979 | -4.0108 | 2.5871 |
| SiHF <sub>3</sub>                                                 | 234.43 | 251.78 | -10.0852 | 0.5486  | 10.6338 | -8.8799 | -2.6673 | 6.2126 |
| SiHCl <sub>3</sub>                                                | 240.49 | 252.27 | -8.5182  | -0.6794 | 7.8388  | -7.7101 | -3.7607 | 3.9494 |
| SiHBr <sub>3</sub>                                                | 232.81 | 245.14 | -7.7892  | -1.5634 | 6.2258  | -7.1805 | -3.9469 | 3.2336 |
| SiHI <sub>3</sub>                                                 | 226.71 | 238.85 | -6.8245  | -2.3423 | 4.4822  | -6.3347 | -4.0205 | 2.3142 |
| SiH(OH) <sub>3</sub>                                              | 183.64 | 196.60 | -7.9388  | 0.2543  | 8.1931  | -7.5506 | -1.2143 | 6.3363 |
| SiH(NH <sub>2</sub> ) <sub>3</sub>                                | 159.02 | 166.48 | -5.8591  | 0.5389  | 6.3980  | -5.6291 | 0.0378  | 5.6669 |
| SiH(CH <sub>3</sub> ) <sub>3</sub>                                | 339.64 | 353.20 | -7.6716  | 0.4548  | 8.1264  | -5.1158 | -2.7085 | 2.4073 |
| SiH(CN) <sub>3</sub>                                              | 278.61 | 298.85 | -9.8366  | -3.1289 | 6.7077  | -8.7850 | -6.0576 | 2.7274 |
| SiH(CCH) <sub>3</sub>                                             | 282.13 | 305.86 | -7.2659  | -1.3467 | 5.9192  | -6.6111 | -3.8885 | 2.7226 |
| SiF <sub>4</sub>                                                  | 258.26 | 277.58 | -11.2712 | -0.1021 | 11.1691 | -9.6745 | -2.9337 | 6.7408 |
| SiCl <sub>4</sub>                                                 | 259.83 | 271.54 | -8.6563  | -1.1219 | 7.5344  | -7.4324 | -3.5838 | 3.8486 |
| SiBr <sub>4</sub>                                                 | 246.88 | 261.40 | -7.8752  | -2.0590 | 5.8162  | -6.7822 | -3.8816 | 2.9006 |
| SiI <sub>4</sub>                                                  | 236.37 | 250.18 | -6.8488  | -2.8050 | 4.0438  | -5.8760 | -4.0996 | 1.7764 |
| Si(OH) <sub>4</sub>                                               | 183.59 | 195.49 | -7.8362  | -0.0440 | 7.7922  | -7.4387 | -1.1225 | 6.3162 |

|                                                                   |        |        |          |         |        |         |         |        |
|-------------------------------------------------------------------|--------|--------|----------|---------|--------|---------|---------|--------|
| Si(NH <sub>2</sub> ) <sub>4</sub>                                 | 184.84 | 188.12 | -5.6957  | 0.3405  | 6.0362 | -5.0370 | -0.1091 | 4.9279 |
| Si(CH <sub>3</sub> ) <sub>4</sub>                                 | 356.82 | 365.68 | -7.4099  | 0.2558  | 7.6657 | -4.9453 | -2.4186 | 2.5267 |
| Si(CN) <sub>4</sub>                                               | 260.03 | 283.52 | -10.2224 | -3.6606 | 6.5618 | -9.6103 | -6.4548 | 3.1555 |
| Si(CCH) <sub>4</sub>                                              | 271.49 | 296.30 | -7.2216  | -1.3481 | 5.8735 | -6.5625 | -3.8036 | 2.7589 |
| <b>Germanium</b>                                                  |        |        |          |         |        |         |         |        |
| GeH <sub>4</sub>                                                  | 394.14 | 426.93 | -8.8564  | 0.5531  | 9.4095 | -5.2909 | -4.6273 | 0.6636 |
| GeH <sub>3</sub> F                                                | 273.52 | 296.03 | -8.7293  | -0.9154 | 7.8139 | -6.8364 | -4.1923 | 2.6441 |
| GeH <sub>3</sub> Cl                                               | 286.50 | 308.49 | -7.9513  | -0.9886 | 6.9627 | -6.6659 | -4.5414 | 2.1245 |
| GeH <sub>3</sub> Br                                               | 286.08 | 308.06 | -7.5090  | -1.2306 | 6.2784 | -6.5073 | -4.5796 | 1.9277 |
| GeH <sub>3</sub> I                                                | 288.80 | 307.55 | -6.8478  | -1.4934 | 5.3544 | -6.1452 | -4.5112 | 1.6340 |
| GeH <sub>3</sub> (OH)                                             | 261.63 | 288.32 | -7.4031  | -0.6101 | 6.7930 | -6.2224 | -3.6432 | 2.5792 |
| GeH <sub>3</sub> (NH <sub>2</sub> )                               | 248.16 | 275.00 | -6.4695  | -0.2552 | 6.2143 | -5.7611 | -3.0115 | 2.7496 |
| GeH <sub>3</sub> (CH <sub>3</sub> )                               | 370.99 | 403.68 | -8.1264  | 0.1765  | 8.3029 | -5.1203 | -4.0649 | 1.0554 |
| GeH <sub>3</sub> (CN)                                             | 356.49 | 386.58 | -8.7230  | -1.0401 | 7.6829 | -6.5892 | -5.2333 | 1.3559 |
| GeH <sub>3</sub> (CCH)                                            | 355.73 | 391.77 | -7.2786  | -0.5076 | 6.7710 | -5.7311 | -4.3905 | 1.3406 |
| GeH <sub>2</sub> F <sub>2</sub> ( <i>cis</i> )                    | 236.86 | 259.97 | -9.0274  | -0.7312 | 8.2962 | -7.6455 | -3.8947 | 3.7508 |
| GeH <sub>2</sub> F <sub>2</sub> ( <i>trans</i> )                  | 192.17 | 209.93 | -9.0274  | -0.7312 | 8.2962 | -8.5163 | -3.7584 | 4.7579 |
| GeH <sub>2</sub> Cl <sub>2</sub> ( <i>cis</i> )                   | 258.52 | 281.23 | -8.1800  | -1.3301 | 6.8499 | -7.1118 | -4.3295 | 2.7823 |
| GeH <sub>2</sub> Cl <sub>2</sub> ( <i>trans</i> )                 | 206.67 | 223.09 | -8.1800  | -1.3301 | 6.8499 | -7.6623 | -4.3386 | 3.3237 |
| GeH <sub>2</sub> Br <sub>2</sub> ( <i>cis</i> )                   | 256.77 | 280.39 | -7.7311  | -1.7966 | 5.9345 | -6.8096 | -4.3680 | 2.4416 |
| GeH <sub>2</sub> Br <sub>2</sub> ( <i>trans</i> )                 | 208.03 | 224.54 | -7.7311  | -1.7966 | 5.9345 | -7.2611 | -4.3875 | 2.8736 |
| GeH <sub>2</sub> I <sub>2</sub> ( <i>cis</i> )                    | 255.89 | 278.05 | -6.8871  | -2.2418 | 4.6453 | -6.2478 | -4.2934 | 1.9544 |
| GeH <sub>2</sub> I <sub>2</sub> ( <i>trans</i> )                  | 216.21 | 229.38 | -6.8871  | -2.2418 | 4.6453 | -6.6118 | -4.3029 | 2.3089 |
| GeH <sub>2</sub> (OH) <sub>2</sub> ( <i>cis</i> )                 | 208.87 | 234.65 | -7.6032  | -0.2129 | 7.3903 | -6.7167 | -2.9186 | 3.7981 |
| GeH <sub>2</sub> (OH) <sub>2</sub> ( <i>trans</i> )               | 187.09 | 206.89 | -7.6032  | -0.2129 | 7.3903 | -7.1088 | -2.6887 | 4.4201 |
| GeH <sub>2</sub> (NH <sub>2</sub> ) <sub>2</sub> ( <i>cis</i> )   | 197.79 | 220.17 | -6.3278  | 0.1494  | 6.4772 | -6.0122 | -1.8891 | 4.1231 |
| GeH <sub>2</sub> (NH <sub>2</sub> ) <sub>2</sub> ( <i>trans</i> ) | 167.27 | 185.33 | -6.3278  | 0.1494  | 6.4772 | -6.2314 | -1.5847 | 4.6467 |
| GeH <sub>2</sub> (CH <sub>3</sub> ) <sub>2</sub> ( <i>cis</i> )   | 359.36 | 389.92 | -7.7017  | 0.4674  | 8.1691 | -4.9371 | -3.5804 | 1.3567 |
| GeH <sub>2</sub> (CH <sub>3</sub> ) <sub>2</sub> ( <i>trans</i> ) | 351.15 | 383.06 | -7.7017  | 0.4674  | 8.1691 | -4.9843 | -3.5294 | 1.4549 |
| GeH <sub>2</sub> (CN) <sub>2</sub> ( <i>cis</i> )                 | 330.86 | 365.25 | -9.1977  | -1.9911 | 7.2066 | -7.5524 | -5.7411 | 1.8113 |
| GeH <sub>2</sub> (CN) <sub>2</sub> ( <i>trans</i> )               | 312.54 | 341.05 | -9.1977  | -1.9911 | 7.2066 | -7.8504 | -5.7722 | 2.0782 |
| GeH <sub>2</sub> (CCH) <sub>2</sub> ( <i>cis</i> )                | 327.62 | 367.88 | -7.2549  | -0.8489 | 6.4060 | -6.0933 | -4.2222 | 1.8711 |
| GeH <sub>2</sub> (CCH) <sub>2</sub> ( <i>trans</i> )              | 320.33 | 355.87 | -7.2549  | -0.8489 | 6.4060 | -6.5008 | -4.2287 | 2.2721 |
| GeHF <sub>3</sub>                                                 | 193.47 | 216.32 | -10.1936 | -1.2712 | 8.9224 | -9.1438 | -3.5069 | 5.6369 |
| GeHCl <sub>3</sub>                                                | 217.85 | 236.87 | -8.4938  | -2.0305 | 6.4633 | -7.8533 | -4.1503 | 3.7030 |
| GeHBr <sub>3</sub>                                                | 216.08 | 236.10 | -7.8003  | -2.5210 | 5.2793 | -7.2528 | -4.2166 | 3.0362 |
| GeHI <sub>3</sub>                                                 | 217.40 | 234.97 | -6.8607  | -2.9283 | 3.9324 | -6.4084 | -4.1598 | 2.2486 |
| GeH(OH) <sub>3</sub>                                              | 159.56 | 182.09 | -7.7178  | -0.3993 | 7.3185 | -7.4473 | -2.0782 | 5.3691 |
| GeH(NH <sub>2</sub> ) <sub>3</sub>                                | 166.01 | 180.61 | -6.2022  | 0.1864  | 6.3886 | -5.7655 | -0.845  | 4.9205 |
| GeH(CH <sub>3</sub> ) <sub>3</sub>                                | 350.53 | 378.52 | -7.4398  | 0.4352  | 7.8750 | -4.7719 | -3.1415 | 1.6304 |
| GeH(CN) <sub>3</sub>                                              | 297.11 | 332.65 | -9.7620  | -2.7592 | 7.0028 | -8.5883 | -6.2124 | 2.3759 |
| GeH(CCH) <sub>3</sub>                                             | 301.85 | 342.40 | -7.2771  | -1.0968 | 6.1803 | -8.5883 | -6.2124 | 2.3759 |
| GeF <sub>4</sub>                                                  | 185.76 | 212.36 | -11.2093 | -2.5464 | 8.6629 | -9.9339 | -4.0681 | 5.8658 |
| GeCl <sub>4</sub>                                                 | 218.45 | 236.91 | -8.7530  | -2.8138 | 5.9392 | -7.6709 | -4.4844 | 3.1865 |
| GeBr <sub>4</sub>                                                 | 214.39 | 235.03 | -7.9687  | -3.2522 | 4.7165 | -6.9864 | -4.6562 | 2.3302 |
| GeI <sub>4</sub>                                                  | 213.94 | 231.36 | -6.9336  | -3.5335 | 3.4001 | -6.0403 | -4.6485 | 1.3918 |
| Ge(OH) <sub>4</sub>                                               | 133.77 | 156.28 | -7.9387  | -0.9222 | 7.0165 | -7.5995 | -1.9533 | 5.6462 |
| Ge(NH <sub>2</sub> ) <sub>4</sub>                                 | 173.56 | 185.40 | -5.8926  | -0.1025 | 5.7901 | -5.6307 | -0.7029 | 4.9278 |
| Ge(CH <sub>3</sub> ) <sub>4</sub>                                 | 356.12 | 378.05 | -7.2216  | 0.2210  | 7.4426 | -4.5537 | -2.8587 | 1.6950 |
| Ge(CN) <sub>4</sub>                                               | 275.20 | 313.95 | -10.2320 | -3.4008 | 6.8312 | -9.3596 | -6.6180 | 2.7416 |



|                                                                               |        |        |          |         |         |          |          |        |
|-------------------------------------------------------------------------------|--------|--------|----------|---------|---------|----------|----------|--------|
| Ge(CCH) <sub>4</sub>                                                          | 285.89 | 327.45 | -7.2999  | -1.1724 | 6.1275  | -6.6934  | -4.0282  | 2.6652 |
| <b>Phosphorus</b>                                                             |        |        |          |         |         |          |          |        |
| PH <sub>3</sub> F <sup>+</sup>                                                | 393.19 | 407.91 | -17.5408 | -8.5796 | 8.9612  | -15.2010 | -13.1155 | 2.0855 |
| PH <sub>3</sub> Cl <sup>+</sup>                                               | 407.51 | 419.46 | -15.0939 | -8.0064 | 7.0875  | -13.9576 | -12.6513 | 1.3063 |
| PH <sub>3</sub> Br <sup>+</sup>                                               | 396.89 | 407.96 | -14.1207 | -8.1289 | 5.9918  | -13.4493 | -12.3195 | 1.1298 |
| PH <sub>3</sub> I <sup>+</sup>                                                | 381.52 | 387.48 | -12.8630 | -8.2218 | 4.6412  | -12.6248 | -11.7526 | 0.8722 |
| PH <sub>3</sub> (OH) <sup>+</sup>                                             | 364.48 | 376.99 | -15.4914 | -7.6143 | 7.8771  | -14.1330 | -11.9683 | 2.1647 |
| PH <sub>3</sub> (NH <sub>2</sub> ) <sup>+</sup>                               | 312.70 | 319.05 | -13.5878 | -6.7973 | 6.7905  | -13.2327 | -10.9095 | 2.3232 |
| PH <sub>3</sub> (CH <sub>3</sub> ) <sup>+</sup>                               | 528.33 | 540.49 | -16.2382 | -6.1668 | 10.0714 | -12.5019 | -11.1223 | 1.3796 |
| PH <sub>3</sub> (CN) <sup>+</sup>                                             | 495.63 | 520.38 | -15.3083 | -8.3758 | 6.9325  | -13.7514 | -13.4800 | 0.2714 |
| PH <sub>3</sub> (CCH) <sup>+</sup>                                            | 462.62 | 487.06 | -13.569  | -7.3679 | 6.2011  | -12.5284 | -12.015  | 0.5134 |
| PH <sub>2</sub> F <sub>2</sub> <sup>+</sup> ( <i>cis</i> )                    | 347.59 | 368.00 | -17.5742 | -8.1063 | 9.4679  | -15.8402 | -12.6125 | 3.2277 |
| PH <sub>2</sub> F <sub>2</sub> <sup>+</sup> ( <i>trans</i> )                  | 271.82 | 288.03 | -17.5742 | -8.1063 | 9.4679  | -16.6360 | -12.2685 | 4.3675 |
| PH <sub>2</sub> Cl <sub>2</sub> <sup>+</sup> ( <i>cis</i> )                   | 356.07 | 373.67 | -14.8192 | -7.8926 | 6.9266  | -13.6032 | -11.9045 | 1.6987 |
| PH <sub>2</sub> Cl <sub>2</sub> <sup>+</sup> ( <i>trans</i> )                 | 288.10 | 304.81 | -14.8192 | -7.8926 | 6.9266  | -14.0187 | -11.7104 | 2.3083 |
| PH <sub>2</sub> Br <sub>2</sub> <sup>+</sup> ( <i>cis</i> )                   | 340.43 | 361.30 | -13.7026 | -8.1956 | 5.5070  | -12.8157 | -11.5007 | 1.3150 |
| PH <sub>2</sub> Br <sub>2</sub> <sup>+</sup> ( <i>trans</i> )                 | 280.38 | 300.15 | -13.7026 | -8.1956 | 5.5070  | -13.1296 | -11.2981 | 1.8315 |
| PH <sub>2</sub> I <sub>2</sub> <sup>+</sup> ( <i>cis</i> )                    | 320.23 | 344.38 | -12.2077 | -8.3310 | 3.8767  | -11.6819 | -10.8187 | 0.8632 |
| PH <sub>2</sub> I <sub>2</sub> <sup>+</sup> ( <i>trans</i> )                  | 273.96 | 297.68 | -12.2077 | -8.3310 | 3.8767  | -11.8995 | -10.5950 | 1.3045 |
| PH <sub>2</sub> (OH) <sub>2</sub> <sup>+</sup> ( <i>cis</i> )                 | 304.89 | 323.59 | -15.4834 | -6.5790 | 8.9044  | -14.2713 | -10.7033 | 3.5680 |
| PH <sub>2</sub> (OH) <sub>2</sub> <sup>+</sup> ( <i>trans</i> )               | 242.23 | 255.48 | -15.4834 | -6.5790 | 8.9044  | -15.2684 | -10.1731 | 5.0953 |
| PH <sub>2</sub> (NH <sub>2</sub> ) <sub>2</sub> <sup>+</sup> ( <i>cis</i> )   | 250.44 | 262.45 | -13.0896 | -5.4726 | 7.6170  | -13.1675 | -9.1169  | 4.0506 |
| PH <sub>2</sub> (NH <sub>2</sub> ) <sub>2</sub> <sup>+</sup> ( <i>trans</i> ) | 173.99 | 180.79 | -13.0896 | -5.4726 | 7.6170  | -13.4995 | -8.4647  | 5.0348 |
| PH <sub>2</sub> (CH <sub>3</sub> ) <sub>2</sub> <sup>+</sup> ( <i>cis</i> )   | 519.07 | 540.95 | -15.3097 | -5.4241 | 9.8856  | -11.7984 | -11.0366 | 0.7618 |
| PH <sub>2</sub> (CH <sub>3</sub> ) <sub>2</sub> <sup>+</sup> ( <i>trans</i> ) | 499.00 | 520.28 | -15.3097 | -5.4241 | 9.8856  | -11.8694 | -10.7678 | 1.1016 |
| PH <sub>2</sub> (CN) <sub>2</sub> <sup>+</sup> ( <i>cis</i> )                 | 422.44 | 460.63 | -15.3930 | -9.0294 | 6.3636  | -14.3141 | -13.3056 | 1.0085 |
| PH <sub>2</sub> (CN) <sub>2</sub> <sup>+</sup> ( <i>trans</i> )               | 402.81 | 438.80 | -15.3930 | -9.0294 | 6.3636  | -14.5489 | -13.2326 | 1.3163 |
| PH <sub>2</sub> (CCH) <sub>2</sub> <sup>+</sup> ( <i>cis</i> )                | 394.13 | 432.82 | -12.9933 | -7.2357 | 5.7576  | -12.2023 | -10.9788 | 1.2235 |
| PH <sub>2</sub> (CCH) <sub>2</sub> <sup>+</sup> ( <i>trans</i> )              | 376.65 | 412.10 | -12.9933 | -7.2357 | 5.7576  | -12.638  | -10.8758 | 1.7622 |
| PHF <sub>3</sub> <sup>+</sup>                                                 | 304.49 | 327.50 | -18.9268 | -7.2759 | 11.6509 | -17.4288 | -11.9180 | 5.5108 |
| PHCl <sub>3</sub> <sup>+</sup>                                                | 308.09 | 326.54 | -14.4428 | -7.9300 | 6.5128  | -13.7474 | -11.2791 | 2.4683 |
| PHBr <sub>3</sub> <sup>+</sup>                                                | 289.95 | 313.25 | -13.1601 | -8.3246 | 4.8355  | -12.6102 | -10.8643 | 1.7459 |
| PHI <sub>3</sub> <sup>+</sup>                                                 | 271.15 | 298.64 | -11.5991 | -8.4276 | 3.1715  | -11.1812 | -10.1606 | 1.0206 |
| PH(OH) <sub>3</sub> <sup>+</sup>                                              | 248.98 | 267.21 | -15.24   | -5.4458 | 9.7942  | -15.0719 | -9.291   | 5.7809 |
| PH(NH <sub>2</sub> ) <sub>3</sub> <sup>+</sup>                                | 207.99 | 217.66 | -12.3159 | -4.5027 | 7.8132  | -12.1562 | -7.3223  | 4.8339 |
| PH(CH <sub>3</sub> ) <sub>3</sub> <sup>+</sup>                                | 510.48 | 531.77 | -14.6592 | -4.7573 | 9.9019  | -11.3352 | -10.1785 | 1.1567 |
| PH(CN) <sub>3</sub> <sup>+</sup>                                              | 356.69 | 403.65 | -15.4976 | -9.5123 | 5.9853  | -14.8950 | -13.2139 | 1.6811 |
| PH(CCH) <sub>3</sub> <sup>+</sup>                                             | 346.27 | 391.80 | -12.4238 | -7.0360 | 5.3878  | -12.045  | -10.2611 | 1.7839 |
| PF <sub>4</sub> <sup>+</sup>                                                  | 337.21 | 365.73 | -19.6448 | -7.6412 | 12.0036 | -17.8545 | -11.7707 | 6.0838 |
| PCl <sub>4</sub> <sup>+</sup>                                                 | 325.56 | 344.59 | -14.3108 | -8.1799 | 6.1309  | -13.0133 | -10.9193 | 2.0940 |
| PBr <sub>4</sub> <sup>+</sup>                                                 | 298.58 | 326.85 | -12.9486 | -8.5420 | 4.4066  | -11.8308 | -10.5339 | 1.2969 |
| PI <sub>4</sub> <sup>+</sup>                                                  | 276.07 | 308.26 | -11.3166 | -8.5369 | 2.7797  | -10.3475 | -9.8603  | 0.4872 |
| P(OH) <sub>4</sub> <sup>+</sup>                                               | 257.16 | 277.97 | -14.8981 | -5.5703 | 9.3278  | -14.4783 | -8.3539  | 6.1244 |
| P(NH <sub>2</sub> ) <sub>4</sub> <sup>+</sup>                                 | 249.58 | 258.21 | -11.9683 | -4.4011 | 7.5672  | -11.4697 | -6.4147  | 5.0550 |
| P(CH <sub>3</sub> ) <sub>4</sub> <sup>+</sup>                                 | 540.99 | 558.68 | -14.1379 | -4.2067 | 9.9312  | -10.8642 | -9.8706  | 0.9936 |
| P(CN) <sub>4</sub> <sup>+</sup>                                               | 316.55 | 369.69 | -15.6347 | -9.7759 | 5.8588  | -15.0105 | -13.2157 | 1.7948 |
| P(CCH) <sub>4</sub> <sup>+</sup>                                              | 327.32 | 376.35 | -12.1087 | -6.6829 | 5.4258  | -11.4122 | -9.8006  | 1.6116 |
| <b>Arsenic</b>                                                                |        |        |          |         |         |          |          |        |
| AsH <sub>3</sub> F <sup>+</sup>                                               | 365.36 | 392.78 | -16.8303 | -8.5398 | 8.2905  | -14.7618 | -12.9234 | 1.8384 |
| AsH <sub>3</sub> Cl <sup>+</sup>                                              | 380.22 | 405.97 | -14.6059 | -8.1430 | 6.4629  | -13.6517 | -12.4105 | 1.2412 |

|                                                                                |        |        |          |          |        |          |          |        |
|--------------------------------------------------------------------------------|--------|--------|----------|----------|--------|----------|----------|--------|
| AsH <sub>3</sub> Br <sup>+</sup>                                               | 373.67 | 397.20 | -13.7536 | -8.2356  | 5.5180 | -13.1683 | -12.0565 | 1.1118 |
| AsH <sub>3</sub> I <sup>+</sup>                                                | 364.94 | 379.94 | -12.6250 | -8.2619  | 4.3631 | -12.4007 | -11.4796 | 0.9211 |
| AsH <sub>3</sub> (OH) <sup>+</sup>                                             | 346.47 | 372.44 | -14.7582 | -7.6009  | 7.1573 | -13.7244 | -11.8757 | 1.8487 |
| AsH <sub>3</sub> (NH <sub>2</sub> ) <sup>+</sup>                               | 308.34 | 326.73 | -13.2228 | -6.7408  | 6.4820 | -12.9286 | -10.8317 | 2.0969 |
| AsH <sub>3</sub> (CN) <sup>+</sup>                                             | 466.44 | 516.34 | -14.9162 | -7.8112  | 7.1050 | -13.7047 | -12.6213 | 1.0834 |
| AsH <sub>3</sub> (CCH) <sup>+</sup>                                            | 447.65 | 494.78 | -13.2076 | -6.9006  | 6.3070 | -12.3297 | -11.792  | 0.5377 |
| AsH <sub>2</sub> F <sub>2</sub> <sup>+</sup> ( <i>cis</i> )                    | 303.18 | 331.19 | -17.1600 | -8.4185  | 8.7415 | -15.6391 | -12.6130 | 3.0261 |
| AsH <sub>2</sub> F <sub>2</sub> <sup>+</sup> ( <i>trans</i> )                  | 236.07 | 259.58 | -17.1600 | -8.4185  | 8.7415 | -16.4443 | -12.4094 | 4.0349 |
| AsH <sub>2</sub> Cl <sub>2</sub> <sup>+</sup> ( <i>cis</i> )                   | 322.45 | 350.83 | -14.5357 | -8.4259  | 6.1098 | -13.5206 | -11.7702 | 1.7504 |
| AsH <sub>2</sub> Cl <sub>2</sub> <sup>+</sup> ( <i>trans</i> )                 | 262.19 | 288.84 | -14.5357 | -8.4259  | 6.1098 | -13.8932 | -11.6179 | 2.2753 |
| AsH <sub>2</sub> Br <sub>2</sub> <sup>+</sup> ( <i>cis</i> )                   | 313.52 | 344.40 | -13.4780 | -8.5566  | 4.9214 | -12.7359 | -11.3270 | 1.4089 |
| AsH <sub>2</sub> Br <sub>2</sub> <sup>+</sup> ( <i>trans</i> )                 | 261.51 | 290.10 | -13.4780 | -8.5566  | 4.9214 | -13.0249 | -11.1554 | 1.8695 |
| AsH <sub>2</sub> I <sub>2</sub> <sup>+</sup> ( <i>cis</i> )                    | 301.96 | 332.93 | -12.0967 | -8.5047  | 3.5920 | -11.6246 | -10.6309 | 0.9937 |
| AsH <sub>2</sub> I <sub>2</sub> <sup>+</sup> ( <i>trans</i> )                  | 264.08 | 292.86 | -12.0967 | -8.5047  | 3.5920 | -11.8307 | -10.4294 | 1.4013 |
| AsH <sub>2</sub> (OH) <sub>2</sub> <sup>+</sup> ( <i>cis</i> )                 | 269.52 | 297.98 | -14.7695 | -6.8736  | 7.8959 | -14.1062 | -10.8554 | 3.2508 |
| AsH <sub>2</sub> (OH) <sub>2</sub> <sup>+</sup> ( <i>trans</i> )               | 223.85 | 246.04 | -14.7695 | -6.8736  | 7.8959 | -14.5492 | -10.5075 | 4.0417 |
| AsH <sub>2</sub> (NH <sub>2</sub> ) <sub>2</sub> <sup>+</sup> ( <i>cis</i> )   | 231.33 | 254.25 | -12.7267 | -5.7518  | 6.9749 | -12.7098 | -9.2513  | 3.4585 |
| AsH <sub>2</sub> (NH <sub>2</sub> ) <sub>2</sub> <sup>+</sup> ( <i>trans</i> ) | 176.03 | 193.17 | -12.7267 | -5.7518  | 6.9749 | -12.836  | -8.8276  | 4.0084 |
| AsH <sub>2</sub> (CH <sub>3</sub> ) <sub>2</sub> <sup>+</sup> ( <i>cis</i> )   | 500.16 | 540.72 | -14.8027 | -5.3413  | 9.4614 | -11.3952 | -11.1877 | 0.2075 |
| AsH <sub>2</sub> (CH <sub>3</sub> ) <sub>2</sub> <sup>+</sup> ( <i>trans</i> ) | 486.75 | 527.34 | -14.8027 | -5.3413  | 9.4614 | -11.4147 | -11.039  | 0.3757 |
| AsH <sub>2</sub> (CN) <sub>2</sub> <sup>+</sup> ( <i>cis</i> )                 | 407.77 | 465.56 | -15.0772 | -8.4978  | 6.5794 | -14.0516 | -13.0511 | 1.0005 |
| AsH <sub>2</sub> (CN) <sub>2</sub> <sup>+</sup> ( <i>trans</i> )               | 385.22 | 442.28 | -15.0772 | -8.4978  | 6.5794 | -14.2061 | -12.9834 | 1.2227 |
| AsH <sub>2</sub> (CCH) <sub>2</sub> <sup>+</sup> ( <i>cis</i> )                | 384.07 | 442.85 | -12.7787 | -6.8660  | 5.9127 | -12.1535 | -10.8657 | 1.2878 |
| AsH <sub>2</sub> (CCH) <sub>2</sub> <sup>+</sup> ( <i>trans</i> )              | 367.97 | 424.43 | -12.7787 | -6.8660  | 5.9127 | -12.5073 | -10.7722 | 1.7351 |
| AsHF <sub>3</sub> <sup>+</sup>                                                 | 236.12 | 264.31 | -18.3714 | -9.3368  | 9.0346 | -17.2123 | -12.2198 | 4.9925 |
| AsHCl <sub>3</sub> <sup>+</sup>                                                | 264.12 | 289.59 | -14.3334 | -8.8924  | 5.4410 | -13.6983 | -11.2090 | 2.4893 |
| AsHBr <sub>3</sub> <sup>+</sup>                                                | 257.00 | 286.18 | -13.1218 | -8.9225  | 4.1993 | -12.5975 | -10.7270 | 1.8705 |
| AsHI <sub>3</sub> <sup>+</sup>                                                 | 250.35 | 280.65 | -11.6109 | -8.7067  | 2.9042 | -11.1949 | -9.9938  | 1.2011 |
| AsH(OH) <sub>3</sub> <sup>+</sup>                                              | 196.58 | 222.30 | -14.7724 | -6.8979  | 7.8745 | -14.6827 | -9.7758  | 4.9069 |
| AsH(NH <sub>2</sub> ) <sub>3</sub> <sup>+</sup>                                | 190.32 | 205.82 | -12.1577 | -5.2409  | 6.9168 | -11.9419 | -7.7603  | 4.1816 |
| AsH(CH <sub>3</sub> ) <sub>3</sub> <sup>+</sup>                                | 484.04 | 522.07 | -14.1975 | -4.6453  | 9.5522 | -10.8986 | -10.3774 | 0.5212 |
| AsH(CN) <sub>3</sub> <sup>+</sup>                                              | 344.20 | 407.60 | -15.3085 | -9.0392  | 6.2693 | -14.6009 | -13.0142 | 1.5867 |
| AsH(CCH) <sub>3</sub> <sup>+</sup>                                             | 337.00 | 399.34 | -12.3673 | -6.7423  | 5.6250 | -12.0081 | -10.2172 | 1.7909 |
| AsF <sub>4</sub> <sup>+</sup>                                                  | 225.55 | 257.95 | -19.1540 | -10.8338 | 8.3202 | -17.7647 | -12.6699 | 5.0948 |
| AsCl <sub>4</sub> <sup>+</sup>                                                 | 260.23 | 283.27 | -14.3197 | -9.4353  | 4.8844 | -13.1828 | -11.0809 | 2.1019 |
| AsBr <sub>4</sub> <sup>+</sup>                                                 | 249.64 | 279.32 | -12.9838 | -9.3138  | 3.6700 | -11.9802 | -10.6289 | 1.3513 |
| AsI <sub>4</sub> <sup>+</sup>                                                  | 242.67 | 273.51 | -11.3666 | -8.8995  | 2.4671 | -10.4750 | -9.8907  | 0.5843 |
| As(OH) <sub>4</sub> <sup>+</sup>                                               | 169.96 | 197.22 | -14.7818 | -7.2906  | 7.4912 | -14.4042 | -9.2122  | 5.1920 |
| As(NH <sub>2</sub> ) <sub>4</sub> <sup>+</sup>                                 | 206.12 | 217.70 | -11.9567 | -5.1742  | 6.7825 | -11.4305 | -6.8674  | 4.5631 |
| As(CH <sub>3</sub> ) <sub>4</sub> <sup>+</sup>                                 | 493.22 | 525.68 | -13.7115 | -4.1724  | 9.5391 | -10.4111 | -9.9535  | 0.4576 |
| As(CN) <sub>4</sub> <sup>+</sup>                                               | 303.12 | 369.80 | -15.5171 | -9.4075  | 6.1096 | -14.9358 | -13.0522 | 1.8836 |
| As(CCH) <sub>4</sub> <sup>+</sup>                                              | 313.65 | 376.56 | -12.1282 | -6.4528  | 5.6754 | -11.4827 | -9.7834  | 1.6993 |

### S3. T1 diagnostics

**Table S2:** T1 diagnostics of all considered compounds  $\text{EH}_4\text{yR}_y^{\text{n}}$  with  $\text{E}^{\text{n}} = \text{Al}^-, \text{Si}, \text{P}^+, \text{Ga}^-, \text{Ge}, \text{As}^+, \text{R} = \text{F}, \text{Cl}, \text{Br}, \text{I}, \text{OH}, \text{NH}_2, \text{CH}_3, \text{CN}, \text{CCH}$ , and  $y = 0, 1, 2, 3, 4$  calculated at the DLPNO-CCSD(T)/cc-pVQZ level of theory.

| Compound                                         | Ground state | Inversion transition state | Compound                                         | Ground state | Inversion transition state |
|--------------------------------------------------|--------------|----------------------------|--------------------------------------------------|--------------|----------------------------|
| Aluminum                                         |              |                            | Gallium                                          |              |                            |
| $\text{AlH}_4^-$                                 | 0.01009231   | 0.00896273                 | $\text{GaH}_4^-$                                 | 0.01536578   | 0.01419500                 |
| $\text{AlH}_3\text{F}^-$                         | 0.01016018   | 0.01204583                 | $\text{GaH}_3\text{F}^-$                         | 0.01369242   | 0.01496438                 |
| $\text{AlH}_3\text{Cl}^-$                        | 0.00711487   | 0.00846520                 | $\text{GaH}_3\text{Cl}^-$                        | 0.01241114   | 0.01268891                 |
| $\text{AlH}_3\text{Br}^-$                        | 0.00635317   | 0.00694931                 | $\text{GaH}_3\text{Br}^-$                        | 0.01078985   | 0.01033029                 |
| $\text{AlH}_3\text{I}^-$                         | 0.00823962   | 0.00852681                 | $\text{GaH}_3\text{I}^-$                         | 0.01163943   | 0.01124518                 |
| $\text{AlH}_3(\text{OH})^-$                      | 0.01022205   | 0.01306864                 | $\text{GaH}_3(\text{OH})^-$                      | 0.01385952   | 0.01613993                 |
| $\text{AlH}_3(\text{NH}_2)^-$                    | 0.00932166   | 0.01196227                 | $\text{GaH}_3(\text{NH}_2)^-$                    | 0.01351100   | 0.01552136                 |
| $\text{AlH}_3(\text{CH}_3)^-$                    | 0.00939141   | 0.00977811                 | $\text{GaH}_3(\text{CH}_3)^-$                    | 0.01345779   | 0.01325302                 |
| $\text{AlH}_3(\text{CN})^-$                      | 0.01314306   | 0.01332283                 | $\text{GaH}_3(\text{CN})^-$                      | 0.01524918   | 0.01477962                 |
| $\text{AlH}_3(\text{CCH})^-$                     | 0.01282137   | 0.01315291                 | $\text{GaH}_3(\text{CCH})^-$                     | 0.01510147   | 0.01471305                 |
| $\text{AlH}_2\text{F}_2^-$ ( <i>cis</i> )        | 0.01065204   | 0.01187185                 | $\text{GaH}_2\text{F}_2^-$ ( <i>cis</i> )        | 0.01310791   | 0.01443041                 |
| $\text{AlH}_2\text{F}_2^-$ ( <i>trans</i> )      | 0.01065204   | 0.01253178                 | $\text{GaH}_2\text{F}_2^-$ ( <i>trans</i> )      | 0.01310791   | 0.01479198                 |
| $\text{AlH}_2\text{Cl}_2^-$ ( <i>cis</i> )       | 0.00631287   | 0.00782332                 | $\text{GaH}_2\text{Cl}_2^-$ ( <i>cis</i> )       | 0.01080841   | 0.01184685                 |
| $\text{AlH}_2\text{Cl}_2^-$ ( <i>trans</i> )     | 0.00631287   | 0.00790256                 | $\text{GaH}_2\text{Cl}_2^-$ ( <i>trans</i> )     | 0.01080841   | 0.01175365                 |
| $\text{AlH}_2\text{Br}_2^-$ ( <i>cis</i> )       | 0.00570971   | 0.00642165                 | $\text{GaH}_2\text{Br}_2^-$ ( <i>cis</i> )       | 0.00893522   | 0.00946635                 |
| $\text{AlH}_2\text{Br}_2^-$ ( <i>trans</i> )     | 0.00570971   | 0.00640345                 | $\text{GaH}_2\text{Br}_2^-$ ( <i>trans</i> )     | 0.00893522   | 0.00936463                 |
| $\text{AlH}_2\text{I}_2^-$ ( <i>cis</i> )        | 0.00799490   | 0.00842527                 | $\text{GaH}_2\text{I}_2^-$ ( <i>cis</i> )        | 0.01022087   | 0.01060671                 |
| $\text{AlH}_2\text{I}_2^-$ ( <i>trans</i> )      | 0.00799490   | 0.00846786                 | $\text{GaH}_2\text{I}_2^-$ ( <i>trans</i> )      | 0.01022087   | 0.01062361                 |
| $\text{AlH}_2(\text{OH})_2^-$ ( <i>cis</i> )     | 0.01091957   | 0.01245980                 | $\text{GaH}_2(\text{OH})_2^-$ ( <i>cis</i> )     | 0.01337299   | 0.01518488                 |
| $\text{AlH}_2(\text{OH})_2^-$ ( <i>trans</i> )   | 0.01091957   | 0.01326520                 | $\text{GaH}_2(\text{OH})_2^-$ ( <i>trans</i> )   | 0.01337299   | 0.01572757                 |
| $\text{AlH}_2(\text{NH}_2)_2^-$ ( <i>cis</i> )   | 0.00958915   | 0.01061763                 | $\text{GaH}_2(\text{NH}_2)_2^-$ ( <i>cis</i> )   | 0.01259241   | 0.01402123                 |
| $\text{AlH}_2(\text{NH}_2)_2^-$ ( <i>trans</i> ) | 0.00958915   | 0.01125548                 | $\text{GaH}_2(\text{NH}_2)_2^-$ ( <i>trans</i> ) | 0.01259241   | 0.01434787                 |
| $\text{AlH}_2(\text{CH}_3)_2^-$ ( <i>cis</i> )   | 0.00921247   | 0.00977630                 | $\text{GaH}_2(\text{CH}_3)_2^-$ ( <i>cis</i> )   | 0.01226503   | 0.01239254                 |
| $\text{AlH}_2(\text{CH}_3)_2^-$ ( <i>trans</i> ) | 0.00921247   | 0.00998230                 | $\text{GaH}_2(\text{CH}_3)_2^-$ ( <i>trans</i> ) | 0.01226503   | 0.01254598                 |
| $\text{AlH}_2(\text{CN})_2^-$ ( <i>cis</i> )     | 0.01390048   | 0.01433545                 | $\text{GaH}_2(\text{CN})_2^-$ ( <i>cis</i> )     | 0.01509213   | 0.01507472                 |
| $\text{AlH}_2(\text{CN})_2^-$ ( <i>trans</i> )   | 0.01390048   | 0.01437915                 | $\text{GaH}_2(\text{CN})_2^-$ ( <i>trans</i> )   | 0.01509213   | 0.01509137                 |
| $\text{AlH}_2(\text{CCH})_2^-$ ( <i>cis</i> )    | 0.01353382   | 0.01408958                 | $\text{GaH}_2(\text{CCH})_2^-$ ( <i>cis</i> )    | 0.01490521   | 0.01486683                 |
| $\text{AlH}_2(\text{CCH})_2^-$ ( <i>trans</i> )  | 0.01353382   | 0.01421702                 | $\text{GaH}_2(\text{CCH})_2^-$ ( <i>trans</i> )  | 0.01490521   | 0.01492191                 |
| $\text{AlHF}_3^-$                                | 0.01079339   | 0.01199223                 | $\text{GaHF}_3^-$                                | 0.01271276   | 0.01412604                 |
| $\text{AlHCl}_3^-$                               | 0.00611428   | 0.00753690                 | $\text{GaHCl}_3^-$                               | 0.00985499   | 0.01100801                 |
| $\text{AlHBr}_3^-$                               | 0.00552288   | 0.00617940                 | $\text{GaHBr}_3^-$                               | 0.00796162   | 0.00855865                 |
| $\text{AlHI}_3^-$                                | 0.00793330   | 0.00833535                 | $\text{GaHI}_3^-$                                | 0.00946384   | 0.00991850                 |
| $\text{AlH}(\text{OH})_3^-$                      | 0.01101102   | 0.01233360                 | $\text{GaH}(\text{OH})_3^-$                      | 0.01304438   | 0.01457143                 |
| $\text{AlH}(\text{NH}_2)_3^-$                    | 0.00966443   | 0.01039650                 | $\text{GaH}(\text{NH}_2)_3^-$                    | 0.01196857   | 0.01321626                 |
| $\text{AlH}(\text{CH}_3)_3^-$                    | 0.00919511   | 0.00983357                 | $\text{GaH}(\text{CH}_3)_3^-$                    | 0.01145309   | 0.01183377                 |
| $\text{AlH}(\text{CN})_3^-$                      | 0.01419367   | 0.01474720                 | $\text{GaH}(\text{CN})_3^-$                      | 0.01496159   | 0.01515386                 |
| $\text{AlH}(\text{CCH})_3^-$                     | 0.01381135   | 0.01449580                 | $\text{GaH}(\text{CCH})_3^-$                     | 0.01474695   | 0.01488103                 |
| $\text{AlF}_4^-$                                 | 0.01056424   | 0.01143835                 | $\text{GaF}_4^-$                                 | 0.01224954   | 0.01348801                 |
| $\text{AlCl}_4^-$                                | 0.00596427   | 0.00709237                 | $\text{GaCl}_4^-$                                | 0.00913839   | 0.01032087                 |
| $\text{AlBr}_4^-$                                | 0.00542689   | 0.00594022                 | $\text{GaBr}_4^-$                                | 0.00732552   | 0.00796818                 |
| $\text{AlI}_4^-$                                 | 0.00781917   | 0.00809386                 | $\text{GaI}_4^-$                                 | 0.00893492   | 0.00934331                 |
| $\text{Al}(\text{OH})_4^-$                       | 0.01086671   | 0.01168363                 | $\text{Ga}(\text{OH})_4^-$                       | 0.01258408   | 0.01380224                 |
| $\text{Al}(\text{NH}_2)_4^-$                     | 0.00955732   | 0.01006414                 | $\text{Ga}(\text{NH}_2)_4^-$                     | 0.01153083   | 0.01246649                 |

| Al(CH <sub>3</sub> ) <sub>4</sub> <sup>-</sup>                    | 0.00923787 | 0.00977889 | Ga(CH <sub>3</sub> ) <sub>4</sub> <sup>-</sup>                    | 0.01090273 | 0.01131380 |
|-------------------------------------------------------------------|------------|------------|-------------------------------------------------------------------|------------|------------|
| Al(CN) <sub>4</sub> <sup>-</sup>                                  | 0.01436861 | 0.01494258 | Ga(CN) <sub>4</sub> <sup>-</sup>                                  | 0.01487815 | 0.01517579 |
| Al(CCH) <sub>4</sub> <sup>-</sup>                                 | 0.01395565 | 0.01461473 | Ga(CCH) <sub>4</sub> <sup>-</sup>                                 | 0.01460450 | 0.01479753 |
| Silicon                                                           |            |            | Germanium                                                         |            |            |
| SiH <sub>4</sub>                                                  | 0.01101788 | 0.00935514 | GeH <sub>4</sub>                                                  | 0.01236853 | 0.01171574 |
| SiH <sub>3</sub> F                                                | 0.01027243 | 0.01345484 | GeH <sub>3</sub> F                                                | 0.01173078 | 0.01474601 |
| SiH <sub>3</sub> Cl                                               | 0.00835016 | 0.01301035 | GeH <sub>3</sub> Cl                                               | 0.01038254 | 0.01411311 |
| SiH <sub>3</sub> Br                                               | 0.00725684 | 0.01003205 | GeH <sub>3</sub> Br                                               | 0.00915334 | 0.01149120 |
| SiH <sub>3</sub> I                                                | 0.00889577 | 0.01197386 | GeH <sub>3</sub> I                                                | 0.01004217 | 0.01290726 |
| SiH <sub>3</sub> (OH)                                             | 0.01014070 | 0.01507140 | GeH <sub>3</sub> (OH)                                             | 0.01168963 | 0.01654636 |
| SiH <sub>3</sub> (NH <sub>2</sub> )                               | 0.00932546 | 0.01467884 | GeH <sub>3</sub> (NH <sub>2</sub> )                               | 0.01116208 | 0.01636222 |
| SiH <sub>3</sub> (CH <sub>3</sub> )                               | 0.00969076 | 0.01030849 | GeH <sub>3</sub> (CH <sub>3</sub> )                               | 0.01104835 | 0.01150399 |
| SiH <sub>3</sub> (CN)                                             | 0.01328243 | 0.01419131 | GeH <sub>3</sub> (CN)                                             | 0.01322136 | 0.01360579 |
| SiH <sub>3</sub> (CCH)                                            | 0.01271539 | 0.01426101 | GeH <sub>3</sub> (CCH)                                            | 0.01286808 | 0.01355227 |
| SiH <sub>2</sub> F <sub>2</sub> ( <i>cis</i> )                    | 0.01062779 | 0.01280507 | GeH <sub>2</sub> F <sub>2</sub> ( <i>cis</i> )                    | 0.01177784 | 0.01428127 |
| SiH <sub>2</sub> F <sub>2</sub> ( <i>trans</i> )                  | 0.01062779 | 0.01370005 | GeH <sub>2</sub> F <sub>2</sub> ( <i>trans</i> )                  | 0.01177784 | 0.01481383 |
| SiH <sub>2</sub> Cl <sub>2</sub> ( <i>cis</i> )                   | 0.00790899 | 0.01174797 | GeH <sub>2</sub> Cl <sub>2</sub> ( <i>cis</i> )                   | 0.00949561 | 0.01288801 |
| SiH <sub>2</sub> Cl <sub>2</sub> ( <i>trans</i> )                 | 0.00790899 | 0.01233749 | GeH <sub>2</sub> Cl <sub>2</sub> ( <i>trans</i> )                 | 0.00949561 | 0.01319877 |
| SiH <sub>2</sub> Br <sub>2</sub> ( <i>cis</i> )                   | 0.00668668 | 0.00909123 | GeH <sub>2</sub> Br <sub>2</sub> ( <i>cis</i> )                   | 0.00797075 | 0.01017554 |
| SiH <sub>2</sub> Br <sub>2</sub> ( <i>trans</i> )                 | 0.00668668 | 0.00925100 | GeH <sub>2</sub> Br <sub>2</sub> ( <i>trans</i> )                 | 0.00797075 | 0.01039520 |
| SiH <sub>2</sub> I <sub>2</sub> ( <i>cis</i> )                    | 0.00869271 | 0.01101456 | GeH <sub>2</sub> I <sub>2</sub> ( <i>cis</i> )                    | 0.00926815 | 0.01158526 |
| SiH <sub>2</sub> I <sub>2</sub> ( <i>trans</i> )                  | 0.00869271 | 0.01132096 | GeH <sub>2</sub> I <sub>2</sub> ( <i>trans</i> )                  | 0.00926815 | 0.01188351 |
| SiH <sub>2</sub> (OH) <sub>2</sub> ( <i>cis</i> )                 | 0.01049995 | 0.01341716 | GeH <sub>2</sub> (OH) <sub>2</sub> ( <i>cis</i> )                 | 0.01164656 | 0.01517824 |
| SiH <sub>2</sub> (OH) <sub>2</sub> ( <i>trans</i> )               | 0.01049995 | 0.01425452 | GeH <sub>2</sub> (OH) <sub>2</sub> ( <i>trans</i> )               | 0.01164656 | 0.01581164 |
| SiH <sub>2</sub> (NH <sub>2</sub> ) <sub>2</sub> ( <i>cis</i> )   | 0.00907770 | 0.01215124 | GeH <sub>2</sub> (NH <sub>2</sub> ) <sub>2</sub> ( <i>cis</i> )   | 0.01068763 | 0.01402260 |
| SiH <sub>2</sub> (NH <sub>2</sub> ) <sub>2</sub> ( <i>trans</i> ) | 0.00907770 | 0.01247812 | GeH <sub>2</sub> (NH <sub>2</sub> ) <sub>2</sub> ( <i>trans</i> ) | 0.01068763 | 0.01439664 |
| SiH <sub>2</sub> (CH <sub>3</sub> ) <sub>2</sub> ( <i>cis</i> )   | 0.00922616 | 0.01026419 | GeH <sub>2</sub> (CH <sub>3</sub> ) <sub>2</sub> ( <i>cis</i> )   | 0.01022652 | 0.01103583 |
| SiH <sub>2</sub> (CH <sub>3</sub> ) <sub>2</sub> ( <i>trans</i> ) | 0.00922616 | 0.01056080 | GeH <sub>2</sub> (CH <sub>3</sub> ) <sub>2</sub> ( <i>trans</i> ) | 0.01022652 | 0.01137465 |
| SiH <sub>2</sub> (CN) <sub>2</sub> ( <i>cis</i> )                 | 0.01321342 | 0.01509182 | GeH <sub>2</sub> (CN) <sub>2</sub> ( <i>cis</i> )                 | 0.01310384 | 0.01419406 |
| SiH <sub>2</sub> (CN) <sub>2</sub> ( <i>trans</i> )               | 0.01321342 | 0.01530572 | GeH <sub>2</sub> (CN) <sub>2</sub> ( <i>trans</i> )               | 0.01310384 | 0.01421061 |
| SiH <sub>2</sub> (CCH) <sub>2</sub> ( <i>cis</i> )                | 0.01396698 | 0.01544467 | GeH <sub>2</sub> (CCH) <sub>2</sub> ( <i>cis</i> )                | 0.01370462 | 0.01465588 |
| SiH <sub>2</sub> (CCH) <sub>2</sub> ( <i>trans</i> )              | 0.01396698 | 0.01541147 | GeH <sub>2</sub> (CCH) <sub>2</sub> ( <i>trans</i> )              | 0.01370462 | 0.01439662 |
| SiHF <sub>3</sub>                                                 | 0.01064859 | 0.01263543 | GeHF <sub>3</sub>                                                 | 0.01176694 | 0.01405227 |
| SiHCl <sub>3</sub>                                                | 0.00797173 | 0.01126544 | GeHCl <sub>3</sub>                                                | 0.00909206 | 0.01220800 |
| SiHBr <sub>3</sub>                                                | 0.00660792 | 0.00850191 | GeHBr <sub>3</sub>                                                | 0.00743940 | 0.00928202 |
| SiHI <sub>3</sub>                                                 | 0.00872941 | 0.01048584 | GeHI <sub>3</sub>                                                 | 0.00892358 | 0.01081985 |
| SiH(OH) <sub>3</sub>                                              | 0.01040613 | 0.01271295 | GeH(OH) <sub>3</sub>                                              | 0.01147005 | 0.01435547 |
| SiH(NH <sub>2</sub> ) <sub>3</sub>                                | 0.00894616 | 0.01071536 | GeH(NH <sub>2</sub> ) <sub>3</sub>                                | 0.01028947 | 0.01260458 |
| SiH(CH <sub>3</sub> ) <sub>3</sub>                                | 0.00902870 | 0.01025665 | GeH(CH <sub>3</sub> ) <sub>3</sub>                                | 0.00969320 | 0.01077963 |
| SiH(CN) <sub>3</sub>                                              | 0.01432165 | 0.01596500 | GeH(CN) <sub>3</sub>                                              | 0.01402776 | 0.01516141 |
| SiH(CCH) <sub>3</sub>                                             | 0.01344553 | 0.01540384 | GeH(CCH) <sub>3</sub>                                             | 0.01323331 | 0.01446077 |
| SiF <sub>4</sub>                                                  | 0.01027897 | 0.01177708 | GeF <sub>4</sub>                                                  | 0.01153751 | 0.01359743 |
| SiCl <sub>4</sub>                                                 | 0.00797937 | 0.01053360 | GeCl <sub>4</sub>                                                 | 0.00882010 | 0.01150282 |
| SiBr <sub>4</sub>                                                 | 0.00655025 | 0.00796854 | GeBr <sub>4</sub>                                                 | 0.00711238 | 0.00859123 |
| SiI <sub>4</sub>                                                  | 0.00870562 | 0.00989391 | GeI <sub>4</sub>                                                  | 0.00870497 | 0.01008864 |
| Si(OH) <sub>4</sub>                                               | 0.01006089 | 0.01174199 | Ge(OH) <sub>4</sub>                                               | 0.01124944 | 0.01348288 |
| Si(NH <sub>2</sub> ) <sub>4</sub>                                 | 0.00872115 | 0.00974539 | Ge(NH <sub>2</sub> ) <sub>4</sub>                                 | 0.00990569 | 0.01183284 |
| Si(CH <sub>3</sub> ) <sub>4</sub>                                 | 0.00893376 | 0.01004997 | Ge(CH <sub>3</sub> ) <sub>4</sub>                                 | 0.00931091 | 0.01042830 |
| Si(CN) <sub>4</sub>                                               | 0.01455105 | 0.01627027 | Ge(CN) <sub>4</sub>                                               | 0.01428267 | 0.01558312 |
| Si(CCH) <sub>4</sub>                                              | 0.01357184 | 0.01540996 | Ge(CCH) <sub>4</sub>                                              | 0.01331345 | 0.01456146 |

| Phosphorus                                                                    |            |            | Arsenic                                                                        |            |            |
|-------------------------------------------------------------------------------|------------|------------|--------------------------------------------------------------------------------|------------|------------|
| PH <sub>3</sub> F <sup>+</sup>                                                | 0.01109429 | 0.01962760 | AsH <sub>3</sub> F <sup>+</sup>                                                | 0.01098899 | 0.01973910 |
| PH <sub>3</sub> Cl <sup>+</sup>                                               | 0.00977562 | 0.02818503 | AsH <sub>3</sub> Cl <sup>+</sup>                                               | 0.00947635 | 0.02635618 |
| PH <sub>3</sub> Br <sup>+</sup>                                               | 0.00830403 | 0.02391464 | AsH <sub>3</sub> Br <sup>+</sup>                                               | 0.00841101 | 0.02304878 |
| PH <sub>3</sub> I <sup>+</sup>                                                | 0.00986833 | 0.02429335 | AsH <sub>3</sub> I <sup>+</sup>                                                | 0.00937801 | 0.02247257 |
| PH <sub>3</sub> (OH) <sup>+</sup>                                             | 0.01083589 | 0.02143819 | AsH <sub>3</sub> (OH) <sup>+</sup>                                             | 0.01074252 | 0.02263098 |
| PH <sub>3</sub> (NH <sub>2</sub> ) <sup>+</sup>                               | 0.00992520 | 0.01913185 | AsH <sub>3</sub> (NH <sub>2</sub> ) <sup>+</sup>                               | 0.01006418 | 0.01973047 |
| PH <sub>3</sub> (CH <sub>3</sub> ) <sup>+</sup>                               | 0.00994744 | 0.01358831 | AsH <sub>3</sub> (CN) <sup>+</sup>                                             | 0.01259943 | 0.02146373 |
| PH <sub>3</sub> (CN) <sup>+</sup>                                             | 0.01396638 | 0.02082534 | AsH <sub>3</sub> (CCH) <sup>+</sup>                                            | 0.01184296 | 0.01729212 |
| PH <sub>3</sub> (CCH) <sup>+</sup>                                            | 0.01306799 | 0.02006296 | AsH <sub>2</sub> F <sub>2</sub> <sup>+</sup> ( <i>cis</i> )                    | 0.01180258 | 0.01734932 |
| PH <sub>2</sub> F <sub>2</sub> <sup>+</sup> ( <i>cis</i> )                    | 0.01193306 | 0.01690552 | AsH <sub>2</sub> F <sub>2</sub> <sup>+</sup> ( <i>trans</i> )                  | 0.01180258 | 0.01823023 |
| PH <sub>2</sub> F <sub>2</sub> <sup>+</sup> ( <i>trans</i> )                  | 0.01193306 | 0.01794104 | AsH <sub>2</sub> Cl <sub>2</sub> <sup>+</sup> ( <i>cis</i> )                   | 0.00951192 | 0.01912430 |
| PH <sub>2</sub> Cl <sub>2</sub> <sup>+</sup> ( <i>cis</i> )                   | 0.01022198 | 0.02037292 | AsH <sub>2</sub> Cl <sub>2</sub> <sup>+</sup> ( <i>trans</i> )                 | 0.00951192 | 0.01937635 |
| PH <sub>2</sub> Cl <sub>2</sub> <sup>+</sup> ( <i>trans</i> )                 | 0.01022198 | 0.02058994 | AsH <sub>2</sub> Br <sub>2</sub> <sup>+</sup> ( <i>cis</i> )                   | 0.00792787 | 0.01565904 |
| PH <sub>2</sub> Br <sub>2</sub> <sup>+</sup> ( <i>cis</i> )                   | 0.00814333 | 0.01591829 | AsH <sub>2</sub> Br <sub>2</sub> <sup>+</sup> ( <i>trans</i> )                 | 0.00792787 | 0.01489648 |
| PH <sub>2</sub> Br <sub>2</sub> <sup>+</sup> ( <i>trans</i> )                 | 0.00814333 | 0.01527686 | AsH <sub>2</sub> I <sub>2</sub> <sup>+</sup> ( <i>cis</i> )                    | 0.00919272 | 0.01687348 |
| PH <sub>2</sub> I <sub>2</sub> <sup>+</sup> ( <i>cis</i> )                    | 0.00991292 | 0.01799801 | AsH <sub>2</sub> I <sub>2</sub> <sup>+</sup> ( <i>trans</i> )                  | 0.00919272 | 0.01545169 |
| PH <sub>2</sub> I <sub>2</sub> <sup>+</sup> ( <i>trans</i> )                  | 0.00991292 | 0.01615354 | AsH <sub>2</sub> (OH) <sub>2</sub> <sup>+</sup> ( <i>cis</i> )                 | 0.01156192 | 0.01888420 |
| PH <sub>2</sub> (OH) <sub>2</sub> <sup>+</sup> ( <i>cis</i> )                 | 0.01157556 | 0.01771646 | AsH <sub>2</sub> (OH) <sub>2</sub> <sup>+</sup> ( <i>trans</i> )               | 0.01156192 | 0.01921073 |
| PH <sub>2</sub> (OH) <sub>2</sub> <sup>+</sup> ( <i>trans</i> )               | 0.01157556 | 0.01777395 | AsH <sub>2</sub> (NH <sub>2</sub> ) <sub>2</sub> <sup>+</sup> ( <i>cis</i> )   | 0.01032579 | 0.01718927 |
| PH <sub>2</sub> (NH <sub>2</sub> ) <sub>2</sub> <sup>+</sup> ( <i>cis</i> )   | 0.01007938 | 0.01622979 | AsH <sub>2</sub> (NH <sub>2</sub> ) <sub>2</sub> <sup>+</sup> ( <i>trans</i> ) | 0.01032579 | 0.01688632 |
| PH <sub>2</sub> (NH <sub>2</sub> ) <sub>2</sub> <sup>+</sup> ( <i>trans</i> ) | 0.01007938 | 0.01545020 | AsH <sub>2</sub> (CH <sub>3</sub> ) <sub>2</sub> <sup>+</sup> ( <i>cis</i> )   | 0.00911176 | 0.01292634 |
| PH <sub>2</sub> (CH <sub>3</sub> ) <sub>2</sub> <sup>+</sup> ( <i>cis</i> )   | 0.00945489 | 0.01442860 | AsH <sub>2</sub> (CH <sub>3</sub> ) <sub>2</sub> <sup>+</sup> ( <i>trans</i> ) | 0.00911176 | 0.01371297 |
| PH <sub>2</sub> (CH <sub>3</sub> ) <sub>2</sub> <sup>+</sup> ( <i>trans</i> ) | 0.00945489 | 0.01444085 | AsH <sub>2</sub> (CN) <sub>2</sub> <sup>+</sup> ( <i>cis</i> )                 | 0.01379727 | 0.01782942 |
| PH <sub>2</sub> (CN) <sub>2</sub> <sup>+</sup> ( <i>cis</i> )                 | 0.01493802 | 0.02073279 | AsH <sub>2</sub> (CN) <sub>2</sub> <sup>+</sup> ( <i>trans</i> )               | 0.01379727 | 0.01807458 |
| PH <sub>2</sub> (CN) <sub>2</sub> <sup>+</sup> ( <i>trans</i> )               | 0.01493802 | 0.02127791 | AsH <sub>2</sub> (CCH) <sub>2</sub> <sup>+</sup> ( <i>cis</i> )                | 0.01244305 | 0.01660603 |
| PH <sub>2</sub> (CCH) <sub>2</sub> <sup>+</sup> ( <i>cis</i> )                | 0.01353375 | 0.01907630 | AsH <sub>2</sub> (CCH) <sub>2</sub> <sup>+</sup> ( <i>trans</i> )              | 0.01244305 | 0.01704198 |
| PH <sub>2</sub> (CCH) <sub>2</sub> <sup>+</sup> ( <i>trans</i> )              | 0.01353375 | 0.01976179 | AsHF <sub>3</sub> <sup>+</sup>                                                 | 0.01225826 | 0.01651519 |
| PHF <sub>3</sub> <sup>+</sup>                                                 | 0.01209319 | 0.01574186 | AsHCl <sub>3</sub> <sup>+</sup>                                                | 0.00977036 | 0.01662376 |
| PHCl <sub>3</sub> <sup>+</sup>                                                | 0.01072245 | 0.01743272 | AsHBr <sub>3</sub> <sup>+</sup>                                                | 0.00780520 | 0.01267796 |
| PHBr <sub>3</sub> <sup>+</sup>                                                | 0.00823046 | 0.01285853 | AsHI <sub>3</sub> <sup>+</sup>                                                 | 0.00920792 | 0.01366042 |
| PHI <sub>3</sub> <sup>+</sup>                                                 | 0.01004127 | 0.01438940 | AsH(OH) <sub>3</sub> <sup>+</sup>                                              | 0.01164764 | 0.01679144 |
| PH(OH) <sub>3</sub> <sup>+</sup>                                              | 0.01139100 | 0.01553363 | AsH(NH <sub>2</sub> ) <sub>3</sub> <sup>+</sup>                                | 0.01023062 | 0.01434619 |
| PH(NH <sub>2</sub> ) <sub>3</sub> <sup>+</sup>                                | 0.00993399 | 0.01321400 | AsH(CH <sub>3</sub> ) <sub>3</sub> <sup>+</sup>                                | 0.00878648 | 0.01254721 |
| PH(CH <sub>3</sub> ) <sub>3</sub> <sup>+</sup>                                | 0.00922436 | 0.01352094 | AsH(CN) <sub>3</sub> <sup>+</sup>                                              | 0.01460301 | 0.01819702 |
| PH(CN) <sub>3</sub> <sup>+</sup>                                              | 0.01548765 | 0.02050255 | AsH(CCH) <sub>3</sub> <sup>+</sup>                                             | 0.01275776 | 0.01622365 |
| PH(CCH) <sub>3</sub> <sup>+</sup>                                             | 0.01373466 | 0.01828347 | AsF <sub>4</sub> <sup>+</sup>                                                  | 0.01226979 | 0.01565288 |
| PF <sub>4</sub> <sup>+</sup>                                                  | 0.01151319 | 0.01432474 | AsCl <sub>4</sub> <sup>+</sup>                                                 | 0.00984911 | 0.01487170 |
| PCl <sub>4</sub> <sup>+</sup>                                                 | 0.01082095 | 0.01551362 | AsBr <sub>4</sub> <sup>+</sup>                                                 | 0.00771094 | 0.01094768 |
| PBr <sub>4</sub> <sup>+</sup>                                                 | 0.00821452 | 0.01123844 | AsI <sub>4</sub> <sup>+</sup>                                                  | 0.00916779 | 0.01206099 |
| PI <sub>4</sub> <sup>+</sup>                                                  | 0.01004701 | 0.01281314 | As(OH) <sub>4</sub> <sup>+</sup>                                               | 0.01153155 | 0.01539917 |
| P(OH) <sub>4</sub> <sup>+</sup>                                               | 0.01090809 | 0.01414399 | As(NH <sub>2</sub> ) <sub>4</sub> <sup>+</sup>                                 | 0.00993927 | 0.01304862 |
| P(NH <sub>2</sub> ) <sub>4</sub> <sup>+</sup>                                 | 0.00954831 | 0.01234834 | As(CH <sub>3</sub> ) <sub>4</sub> <sup>+</sup>                                 | 0.00857964 | 0.01171813 |
| P(CH <sub>3</sub> ) <sub>4</sub> <sup>+</sup>                                 | 0.00908654 | 0.01277140 | As(CN) <sub>4</sub> <sup>+</sup>                                               | 0.01521947 | 0.01854467 |
| P(CN) <sub>4</sub> <sup>+</sup>                                               | 0.01585233 | 0.02018824 | As(CCH) <sub>4</sub> <sup>+</sup>                                              | 0.01294368 | 0.01583818 |
| P(CCH) <sub>4</sub> <sup>+</sup>                                              | 0.01380563 | 0.01750091 |                                                                                |            |            |

## S4. Bond lengths

**Table S3:** Bond lengths of all considered  $ER_4^n$  with  $E^n = Al^-, Si, P^+, Ga^-, Ge, As^+$  and  $R = H, F, Cl, Br, I, OH, NH_2, CH_3, CN, CCH$  of the tetrahedral (GS) and the planar inversion transition structure (TS), calculated at the B97M-D3(BJ)/cc-pVTZ level of theory. In all cases, the bond lengths of the transition structure are longer than those of the ground state.

| Compound          | $R_{GS}$ [pm] | $R_{TS}$ [pm] | Difference [pm] | Compound         | $R_{GS}$ [pm] | $R_{TS}$ [pm] | Difference [pm] |
|-------------------|---------------|---------------|-----------------|------------------|---------------|---------------|-----------------|
| <b>Aluminum</b>   |               |               |                 | <b>Gallium</b>   |               |               |                 |
| $AlH_4^-$         | 164.56        | 170.50        | 5.94            | $GaH_4^-$        | 163.01        | 173.24        | 10.23           |
| $AlF_4^-$         | 169.03        | 172.26        | 3.23            | $GaF_4^-$        | 178.33        | 180.70        | 2.37            |
| $AlCl_4^-$        | 214.75        | 220.35        | 5.60            | $GaCl_4^-$       | 219.20        | 224.93        | 5.73            |
| $AlBr_4^-$        | 230.01        | 236.25        | 6.24            | $GaBr_4^-$       | 233.39        | 239.98        | 6.58            |
| $AlI_4^-$         | 250.66        | 257.92        | 7.26            | $GaI_4^-$        | 252.47        | 260.58        | 8.11            |
| $Al(OH)_4^-$      | 176.90        | 179.97        | 3.08            | $Ga(OH)_4^-$     | 185.36        | 188.01        | 2.66            |
| $Al(NH_2)_4^-$    | 186.49        | 188.55        | 2.05            | $Ga(NH_2)_4^-$   | 193.36        | 196.20        | 2.84            |
| $Al(CH_3)_4^-$    | 201.74        | 207.30        | 5.56            | $Ga(CH_3)_4^-$   | 203.95        | 212.07        | 8.12            |
| $Al(CN)_4^-$      | 196.49        | 199.94        | 3.45            | $Ga(CN)_4^-$     | 197.39        | 204.20        | 6.80            |
| $Al(CCH)_4^-$     | 196.23        | 199.46        | 3.23            | $Ga(CCH)_4^-$    | 197.29        | 203.59        | 6.30            |
| <b>Silicon</b>    |               |               |                 | <b>Germanium</b> |               |               |                 |
| $SiH_4$           | 148.19        | 154.60        | 6.41            | $GeH_4$          | 152.95        | 162.64        | 9.69            |
| $SiF_4$           | 156.37        | 160.06        | 3.69            | $GeF_4$          | 168.76        | 171.45        | 2.69            |
| $SiCl_4$          | 201.92        | 208.22        | 6.29            | $GeCl_4$         | 210.91        | 216.85        | 5.94            |
| $SiBr_4$          | 218.22        | 225.09        | 6.87            | $GeBr_4$         | 226.37        | 233.03        | 6.66            |
| $SiI_4$           | 240.17        | 247.92        | 7.75            | $GeI_4$          | 247.06        | 254.90        | 7.84            |
| $Si(OH)_4$        | 163.25        | 167.10        | 3.85            | $Ge(OH)_4$       | 175.25        | 178.27        | 3.02            |
| $Si(NH_2)_4$      | 171.83        | 173.90        | 2.06            | $Ge(NH_2)_4$     | 182.91        | 185.10        | 2.19            |
| $Si(CH_3)_4$      | 187.06        | 193.32        | 6.26            | $Ge(CH_3)_4$     | 195.12        | 203.02        | 7.90            |
| $Si(CN)_4$        | 181.91        | 185.14        | 3.23            | $Ge(CN)_4$       | 189.28        | 194.71        | 5.43            |
| $Si(CCH)_4$       | 181.04        | 184.05        | 3.02            | $Ge(CCH)_4$      | 188.36        | 193.26        | 4.91            |
| <b>Phosphorus</b> |               |               |                 | <b>Arsenic</b>   |               |               |                 |
| $PF_4^+$          | 148.50        | 152.94        | 4.44            | $AsF_4^+$        | 162.88        | 165.90        | 3.02            |
| $PCl_4^+$         | 194.35        | 201.72        | 7.37            | $AsCl_4^+$       | 205.93        | 212.26        | 6.34            |
| $PBr_4^+$         | 211.87        | 219.88        | 8.01            | $AsBr_4^+$       | 222.43        | 229.32        | 6.88            |
| $PI_4^+$          | 235.15        | 243.78        | 8.63            | $AsI_4^+$        | 244.24        | 251.92        | 7.69            |
| $P(OH)_4^+$       | 154.46        | 159.36        | 4.91            | $As(OH)_4^+$     | 168.72        | 172.32        | 3.59            |
| $P(NH_2)_4^+$     | 162.78        | 165.95        | 3.17            | $As(NH_2)_4^+$   | 176.28        | 177.61        | 1.33            |
| $P(CH_3)_4^+$     | 178.66        | 184.86        | 6.19            | $As(CH_3)_4^+$   | 190.30        | 197.24        | 6.93            |
| $P(CN)_4^+$       | 172.64        | 175.84        | 3.20            | $As(CN)_4^+$     | 183.80        | 188.38        | 4.58            |
| $P(CCH)_4^+$      | 170.92        | 174.15        | 3.23            | $As(CCH)_4^+$    | 181.77        | 186.04        | 4.27            |

## S5. Further comments on the structure optimizations and on the IRC calculations

### Structure optimizations

The transition structure optimizations for  $\text{GaH}_3\text{R}^-$ ,  $\text{R} = \text{Br}, \text{I}, \text{CN}$  converged to dissociative structures ( $\text{GaH}_3 + \text{R}^-$ ). In all three cases, the frequency analysis revealed a single imaginary frequency corresponding to an inversion process. However, due the significant structural differences, the data of  $\text{GaH}_3\text{R}^-$ ,  $\text{R} = \text{Br}, \text{I}, \text{CN}$  cannot be compared with that of all other compounds.

The lowest-energy square planar states of  $\text{PH}_4^+$  and  $\text{AsH}_4^+$  have an open-shell singlet electronic configuration. They are valid inversion transition states. Structure optimizations and frequency analyses for those two compounds were done on the CASSCF(8,8)/cc-pVTZ level of theory followed by single point calculations with NEVPT2/cc-pVQZ (see Chapter S1 for further details).

It was not possible to locate an inversion transition state of  $\text{AsH}_3(\text{CH}_3)^+$  with the applied DFT method. This is ascribed to the significant multiconfigurational character of the compound. For all other molecules of the type  $\text{AsH}_3\text{R}^+$ , the transition structure optimization with DFT was successful.

The frequency analysis of the optimized inversion transition structure of *trans*- $\text{GeH}_2(\text{CH}_3)_2$  consistently gave two imaginary frequencies – despite several structure optimizations: the inversion mode ( $1335i \text{ cm}^{-1}$ ) and an additional mode ( $29i \text{ cm}^{-1}$ ). The second imaginary vibration was considered negligible.

### IRC calculations

To further verify the located transition structures to correspond to true inversion transition state, IRC calculations were carried out as described in Chapter S1. In all cases, tetrahedral structures were obtained. It should be noted that the extreme tight convergence criteria mentioned above were not met by all calculations. However, the energies of the final IRC structures differed by less than  $1 \text{ kJ mol}^{-1}$  from the final single point energy of the B97M-D3(BJ)/cc-pVTZ structural optimizations. Only for the *trans*-inversion of  $\text{SiH}_2(\text{NH}_2)_2$  (both directions) and the *cis*-inversion of  $\text{SiH}_2(\text{OH})_2$  (both directions) larger deviations were obtained ( $5.0$  and  $4.5 \text{ kJ mol}^{-1}$ , respectively). Those were traced back to rotations around the Si-N and Si-O bond respectively and are hence not of relevance. Therefore, the IRC calculations verified the located first order saddle points as valid inversion transition states.

## S6. Influence of diffuse basis functions

The inversion barrier heights obtained on the DLPNO-CCSD(T)/cc-pVQZ level were compared to those from DLPNO-CCSD(T)/aug-cc-pVQZ for the elements of group 13 and 14 (Al, Ga, Si, Ge). For that, nine randomly chosen inversion barriers were recomputed by reoptimizing the structures on the B97M-D3(BJ)/aug-cc-pVTZ level and subsequent final single point energy calculation with DLPNO-CCSD(T)/aug-cc-pVQZ. The chosen cases are:  $\text{EH}_4^n$ ,  $\text{EF}_4^n$ ,  $\text{EHF}_3^n$ ,  $\text{EH}_2\text{Cl}_2^n$  (*cis* and *trans*),  $\text{EH}_3\text{Br}^n$ ,  $\text{EH}_2(\text{CN})_2^n$  (*cis* and *trans*),  $\text{EH}_3(\text{CCH})^n$ , with  $\text{E}^n = \text{Al}^-, \text{Si}, \text{Ga}^-, \text{Ge}$ . The dissociative structure of  $\text{GaH}_3\text{Br}^-$  was also found with the aug-basis set (see Chapter S5). In all cases, the barrier calculated with the aug-cc-pVQZ basis set was lower by an overall average value of  $2.2 \text{ kJ mol}^{-1}$ . This means that no significant influence of diffuse basis functions on the inversion barriers heights was found.

**Table S4:** Comparison of the inversion barrier heights with respect to the use of diffuse basis functions for a selected class of compounds.

| Compound                                       | Inversion barrier [ $\text{kJ mol}^{-1}$ ]         |                                                            | Difference in the inversion barrier height [ $\text{kJ mol}^{-1}$ ] |
|------------------------------------------------|----------------------------------------------------|------------------------------------------------------------|---------------------------------------------------------------------|
|                                                | DLPNO-CCSD(T)/<br>cc-pVQZ//B97M-D3(BJ)/<br>cc-pVTZ | DLPNO-CCSD(T)/<br>aug-cc-pVQZ//B97M-<br>D3(BJ)/aug-cc-pVTZ |                                                                     |
| <b>Aluminum</b>                                |                                                    |                                                            |                                                                     |
| $\text{AlH}_4^-$                               | 224.75                                             | 221.01                                                     | -3.74                                                               |
| $\text{AlF}_4^-$                               | 191.17                                             | 187.07                                                     | -4.10                                                               |
| $\text{AlHF}_3^-$                              | 176.60                                             | 172.95                                                     | -3.65                                                               |
| $\text{AlH}_2\text{Cl}_2^-$ ( <i>cis</i> )     | 179.76                                             | 177.16                                                     | -2.60                                                               |
| $\text{AlH}_2\text{Cl}_2^-$ ( <i>trans</i> )   | 144.83                                             | 142.35                                                     | -2.48                                                               |
| $\text{AlH}_3\text{Br}^-$                      | 172.82                                             | 170.01                                                     | -2.81                                                               |
| $\text{AlH}_2(\text{CN})_2^-$ ( <i>cis</i> )   | 196.63                                             | 194.81                                                     | -1.82                                                               |
| $\text{AlH}_2(\text{CN})_2^-$ ( <i>trans</i> ) | 182.23                                             | 180.29                                                     | -1.94                                                               |
| $\text{AlH}_3(\text{CCH})^-$                   | 210.33                                             | 207.77                                                     | -2.56                                                               |

| Gallium                                                          |        |        |       |
|------------------------------------------------------------------|--------|--------|-------|
| GaH <sub>4</sub> <sup>-</sup>                                    | 290.62 | 287.05 | -3.57 |
| GaF <sub>4</sub> <sup>-</sup>                                    | 161.07 | 157.13 | -3.94 |
| GaHF <sub>3</sub> <sup>-</sup>                                   | 163.21 | 159.59 | -3.62 |
| GaH <sub>2</sub> Cl <sub>2</sub> <sup>-</sup> ( <i>cis</i> )     | 202.91 | 199.94 | -2.97 |
| GaH <sub>2</sub> Cl <sub>2</sub> <sup>-</sup> ( <i>trans</i> )   | 137.28 | 133.33 | -3.95 |
| GaH <sub>3</sub> Br <sup>-</sup>                                 | 158.65 | 155.35 | -3.30 |
| GaH <sub>2</sub> (CN) <sub>2</sub> <sup>-</sup> ( <i>cis</i> )   | 258.82 | 257.79 | -1.03 |
| GaH <sub>2</sub> (CN) <sub>2</sub> <sup>-</sup> ( <i>trans</i> ) | 225.83 | 224.16 | -1.67 |
| GaH <sub>3</sub> (CCH) <sup>-</sup>                              | 271.25 | 269.68 | -1.57 |
| Silicon                                                          |        |        |       |
| SiH <sub>4</sub>                                                 | 380.08 | 379.07 | -1.01 |
| SiF <sub>4</sub>                                                 | 277.58 | 275.14 | -2.44 |
| SiHF <sub>3</sub>                                                | 251.78 | 249.69 | -2.09 |
| SiH <sub>2</sub> Cl <sub>2</sub> ( <i>cis</i> )                  | 276.29 | 274.86 | -1.43 |
| SiH <sub>2</sub> Cl <sub>2</sub> ( <i>trans</i> )                | 228.07 | 226.94 | -1.13 |
| SiH <sub>3</sub> Br                                              | 291.22 | 290.55 | -0.67 |
| SiH <sub>2</sub> (CN) <sub>2</sub> ( <i>cis</i> )                | 325.77 | 324.98 | -0.79 |
| SiH <sub>2</sub> (CN) <sub>2</sub> ( <i>trans</i> )              | 309.94 | 309.20 | -0.74 |
| SiH <sub>3</sub> (CCH)                                           | 347.47 | 346.92 | -0.55 |
| Germanium                                                        |        |        |       |
| GeH <sub>4</sub>                                                 | 426.93 | 426.91 | -0.02 |
| GeF <sub>4</sub>                                                 | 212.36 | 210.03 | -2.33 |
| GeHF <sub>3</sub>                                                | 216.32 | 214.06 | -2.26 |
| GeH <sub>2</sub> Cl <sub>2</sub> ( <i>cis</i> )                  | 281.23 | 277.62 | -3.61 |
| GeH <sub>2</sub> Cl <sub>2</sub> ( <i>trans</i> )                | 223.09 | 220.38 | -2.71 |
| GeH <sub>3</sub> Br                                              | 308.06 | 306.21 | -1.85 |
| GeH <sub>2</sub> (CN) <sub>2</sub> ( <i>cis</i> )                | 365.25 | 363.98 | -1.27 |
| GeH <sub>2</sub> (CN) <sub>2</sub> ( <i>trans</i> )              | 341.05 | 339.53 | -1.52 |
| GeH <sub>3</sub> (CCH)                                           | 391.77 | 390.48 | -1.29 |

## S7. Final single point energy benchmark

Various computational methods for the calculation of the final single point energies and hence of the inversion barrier heights were benchmarked against CCSD(T) data extrapolated toward the complete basis set limit. The two-point extrapolation was done with the cc-pVTZ and the cc-pVQZ basis set (Table S5). The extrapolated SCF ( ${}^{\infty}E_{SCF}$ ) and correlation energy ( ${}^{\infty}E_{corr}$ ) were calculated by

$${}^{\infty}E = {}^{\infty}E_{SCF} + {}^{\infty}E_{corr} = \frac{{}^X E_{SCF} \cdot e^{-\alpha\sqrt{Y}} - {}^Y E_{SCF} \cdot e^{-\alpha\sqrt{X}}}{e^{-\alpha\sqrt{Y}} - e^{-\alpha\sqrt{X}}} + \frac{{}^X E_{corr} \cdot X^{\beta} - {}^Y E_{corr} \cdot Y^{\beta}}{X^{\beta} - Y^{\beta}}, \quad (1)$$

with

$$X = 3, Y = 4, \alpha = 5.46, \beta = 3.05.^{13,32}$$

A subclass of all investigated molecules was used:  $\mathbf{EH}_{4-y}\mathbf{R}_y^n$ , with  $\mathbf{E}^n = \text{Al}^-, \text{Si}, \text{Ga}^-, \text{Ge}$  for  $y = 0$  and  $\text{Al}^-, \text{Si}, \text{P}^+, \text{Ga}^-, \text{Ge}, \text{As}^+$  for  $y = 4$  and  $\mathbf{R} = \text{F}, \text{CN}$ .

Data evaluation was done with respect to the mean signed (relative) deviation (MSD and  $\text{MSD}_{rel}$ ) and the mean absolute (relative) deviation (MAD and  $\text{MAD}_{rel}$ ). "IB" stands for inversion barrier in the following formulas. The number of considered barriers is given by  $n$  ( $n = 16$ ).



$$MSD = \frac{1}{n} \cdot \sum_{i=0}^n IB_i - {}^{\infty}IB \quad (2)$$

$$MSD_{rel} = \frac{1}{n} \cdot \sum_{i=0}^n \frac{IB_i - {}^{\infty}IB}{{}^{\infty}IB} \quad (3)$$

$$MAD = \frac{1}{n} \cdot \sum_{i=0}^n |IB_i - {}^{\infty}IB| \quad (4)$$

$$MAD_{rel} = \frac{1}{n} \cdot \sum_{i=0}^n \left| \frac{IB_i - {}^{\infty}IB}{{}^{\infty}IB} \right| \quad (5)$$



**Table S6:** Selected inversion barrier heights calculated at various levels of theory and their deviations to the CCSD(T)/CBS data given in Table S5.

|                                              | CCSD(T)/<br>cc-pVTZ                      |                                    | CCSD(T)/<br>cc-pVQZ                      |                                    | DLPNO-<br>CCSD(T)/<br>cc-pVQZ            |                                    | B97M-D3(BJ)/<br>cc-pVTZ                  |                                    | B97M-D3(BJ)/<br>cc-pVQZ                  |                                    | B3LYP-<br>D3(BJ)/cc-pVQZ                 |                                    | PW6B95-<br>D3(BJ)/cc-pVQZ                |                                    | TPSS-D3(BJ)/<br>cc-pVQZ                  |                                    | DSD-BLYP/<br>cc-pVQZ                     |                                    |
|----------------------------------------------|------------------------------------------|------------------------------------|------------------------------------------|------------------------------------|------------------------------------------|------------------------------------|------------------------------------------|------------------------------------|------------------------------------------|------------------------------------|------------------------------------------|------------------------------------|------------------------------------------|------------------------------------|------------------------------------------|------------------------------------|------------------------------------------|------------------------------------|
|                                              | I. barrier<br>[kJ<br>mol <sup>-1</sup> ] | Dev.<br>[kJ<br>mol <sup>-1</sup> ] | I. barrier<br>[kJ<br>mol <sup>-1</sup> ] | Dev.<br>[kJ<br>mol <sup>-1</sup> ] | I. barrier<br>[kJ<br>mol <sup>-1</sup> ] | Dev.<br>[kJ<br>mol <sup>-1</sup> ] | I. barrier<br>[kJ<br>mol <sup>-1</sup> ] | Dev.<br>[kJ<br>mol <sup>-1</sup> ] | I. barrier<br>[kJ<br>mol <sup>-1</sup> ] | Dev.<br>[kJ<br>mol <sup>-1</sup> ] | I. barrier<br>[kJ<br>mol <sup>-1</sup> ] | Dev.<br>[kJ<br>mol <sup>-1</sup> ] | I. barrier<br>[kJ<br>mol <sup>-1</sup> ] | Dev.<br>[kJ<br>mol <sup>-1</sup> ] | I. barrier<br>[kJ<br>mol <sup>-1</sup> ] | Dev.<br>[kJ<br>mol <sup>-1</sup> ] | I. barrier<br>[kJ<br>mol <sup>-1</sup> ] | Dev.<br>[kJ<br>mol <sup>-1</sup> ] |
| <b>AlH<sub>4</sub><sup>-</sup></b>           | 225.46                                   | 1.17                               | 224.75                                   | 0.46                               | 224.75                                   | 0.46                               | 219.14                                   | -5.15                              | 219.94                                   | -4.35                              | 221.06                                   | -3.23                              | 221.38                                   | -2.91                              | 218.28                                   | -6.01                              | 226.75                                   | 2.46                               |
| <b>AlF<sub>4</sub><sup>-</sup></b>           | 184.20                                   | -7.51                              | 190.67                                   | -1.03                              | 191.17                                   | -0.53                              | 180.52                                   | -11.19                             | 185.34                                   | -6.36                              | 185.25                                   | -6.45                              | 180.09                                   | -11.62                             | 174.20                                   | -17.50                             | 189.13                                   | -2.57                              |
| <b>Al(CN)<sub>4</sub><sup>-</sup></b>        | 175.99                                   | 1.68                               | 175.39                                   | 1.07                               | 175.86                                   | 1.54                               | 173.03                                   | -1.28                              | 172.69                                   | -1.62                              | 173.44                                   | -0.88                              | 170.19                                   | -4.13                              | 164.60                                   | -9.71                              | 175.87                                   | 1.55                               |
| <b>GaH<sub>4</sub><sup>-</sup></b>           | 292.96                                   | 3.85                               | 290.49                                   | 1.38                               | 290.62                                   | 1.50                               | 261.95                                   | -27.17                             | 262.27                                   | -26.85                             | 268.15                                   | -20.97                             | 270.34                                   | -18.78                             | 264.92                                   | -24.20                             | 289.72                                   | 0.60                               |
| <b>GaF<sub>4</sub><sup>-</sup></b>           | 160.75                                   | 2.09                               | 160.44                                   | 1.79                               | 161.07                                   | 2.42                               | 142.44                                   | -16.21                             | 141.94                                   | -16.71                             | 145.96                                   | -12.70                             | 144.68                                   | -13.97                             | 135.28                                   | -23.38                             | 156.40                                   | -2.26                              |
| <b>Ga(CN)<sub>4</sub><sup>-</sup></b>        | 231.64                                   | -4.63                              | 234.73                                   | -1.53                              | 235.08                                   | -1.19                              | 212.04                                   | -24.23                             | 212.37                                   | -23.90                             | 214.39                                   | -21.88                             | 213.49                                   | -22.77                             | 204.89                                   | -31.38                             | 230.71                                   | -5.55                              |
| <b>SiH<sub>4</sub></b>                       | 380.02                                   | -0.33                              | 380.00                                   | -0.34                              | 380.08                                   | -0.26                              | 364.28                                   | -16.06                             | 363.61                                   | -16.73                             | 374.32                                   | -6.02                              | 378.48                                   | -1.86                              | 375.29                                   | -5.06                              | 383.89                                   | 3.55                               |
| <b>SiF<sub>4</sub></b>                       | 266.15                                   | -12.47                             | 276.79                                   | -1.83                              | 277.58                                   | -1.04                              | 258.26                                   | -20.36                             | 268.04                                   | -10.57                             | 264.50                                   | -14.12                             | 261.02                                   | -17.60                             | 249.11                                   | -29.51                             | 274.15                                   | -4.47                              |
| <b>Si(CN)<sub>4</sub></b>                    | 281.24                                   | -0.48                              | 281.97                                   | 0.24                               | 283.52                                   | 1.79                               | 260.03                                   | -21.69                             | 261.39                                   | -20.33                             | 268.20                                   | -13.52                             | 268.38                                   | -13.34                             | 253.06                                   | -28.66                             | 280.86                                   | -0.86                              |
| <b>GeH<sub>4</sub></b>                       | 423.33                                   | -5.91                              | 426.73                                   | -2.51                              | 426.93                                   | -2.30                              | 394.14                                   | -35.10                             | 393.36                                   | -35.88                             | 402.30                                   | -26.94                             | 406.39                                   | -22.85                             | 398.52                                   | -30.72                             | 429.02                                   | -0.22                              |
| <b>GeF<sub>4</sub></b>                       | 207.01                                   | -5.28                              | 211.62                                   | -0.66                              | 212.36                                   | 0.08                               | 185.76                                   | -26.52                             | 188.45                                   | -23.84                             | 190.42                                   | -21.86                             | 190.63                                   | -21.65                             | 175.15                                   | -37.13                             | 205.87                                   | -6.42                              |
| <b>Ge(CN)<sub>4</sub></b>                    | 307.39                                   | -8.00                              | 312.43                                   | -2.95                              | 313.95                                   | -1.44                              | 275.20                                   | -40.19                             | 276.22                                   | -39.17                             | 283.73                                   | -31.66                             | 286.87                                   | -28.52                             | 265.66                                   | -49.73                             | 307.76                                   | -7.63                              |
| <b>PF<sub>4</sub><sup>+</sup></b>            | 353.14                                   | -13.30                             | 364.14                                   | -2.30                              | 365.73                                   | -0.71                              | 337.21                                   | -29.23                             | 348.42                                   | -18.03                             | 342.22                                   | -24.22                             | 343.82                                   | -22.62                             | 318.87                                   | -47.57                             | 360.66                                   | -5.78                              |
| <b>P(CN)<sub>4</sub><sup>+</sup></b>         | 365.24                                   | -0.90                              | 365.74                                   | -0.41                              | 369.69                                   | 3.55                               | 316.55                                   | -49.60                             | 317.70                                   | -48.45                             | 329.60                                   | -36.54                             | 335.12                                   | -31.02                             | 297.19                                   | -68.96                             | 363.25                                   | -2.90                              |
| <b>AsF<sub>4</sub><sup>+</sup></b>           | 251.03                                   | -6.16                              | 256.25                                   | -0.94                              | 257.95                                   | 0.76                               | 225.55                                   | -31.64                             | 229.31                                   | -27.88                             | 228.83                                   | -28.36                             | 232.70                                   | -24.49                             | 207.63                                   | -49.56                             | 249.14                                   | -8.06                              |
| <b>As(CN)<sub>4</sub><sup>+</sup></b>        | 362.04                                   | -5.86                              | 365.88                                   | -2.01                              | 369.80                                   | 1.91                               | 303.12                                   | -64.77                             | 304.82                                   | -63.07                             | 318.23                                   | -49.67                             | 810.84                                   | 442.95                             | 657.23                                   | 289.33                             | 359.15                                   | -8.75                              |
| <b><i>MSD</i></b><br>[kJ mol <sup>-1</sup> ] | <b>-3.88</b>                             |                                    | <b>-0.72</b>                             |                                    | <b>0.42</b>                              |                                    | <b>-26.27</b>                            |                                    | <b>-23.98</b>                            |                                    | <b>-19.94</b>                            |                                    | <b>11.55</b>                             |                                    | <b>-10.61</b>                            |                                    | <b>-2.96</b>                             |                                    |
| <b><i>MSD<sub>rel</sub></i></b>              | <b>-0.0130</b>                           |                                    | <b>-0.0018</b>                           |                                    | <b>0.0020</b>                            |                                    | <b>-0.0893</b>                           |                                    | <b>-0.0810</b>                           |                                    | <b>-0.0681</b>                           |                                    | <b>0.0159</b>                            |                                    | <b>-0.0554</b>                           |                                    | <b>-0.0108</b>                           |                                    |
| <b><i>MAD</i></b><br>[kJ mol <sup>-1</sup> ] | <b>4.97</b>                              |                                    | <b>1.34</b>                              |                                    | <b>1.34</b>                              |                                    | <b>26.27</b>                             |                                    | <b>23.98</b>                             |                                    | <b>19.94</b>                             |                                    | <b>43.82</b>                             |                                    | <b>46.78</b>                             |                                    | <b>3.98</b>                              |                                    |
| <b><i>MAD<sub>rel</sub></i></b>              | <b>0.0181</b>                            |                                    | <b>0.0050</b>                            |                                    | <b>0.0050</b>                            |                                    | <b>0.0893</b>                            |                                    | <b>0.0810</b>                            |                                    | <b>0.0681</b>                            |                                    | <b>0.1346</b>                            |                                    | <b>0.1538</b>                            |                                    | <b>0.0147</b>                            |                                    |

## S8. *Cis/trans*-isomerism for the inversion transition states of $\text{EH}_2\text{R}_2^n$

The disubstituted compounds  $\text{EH}_2\text{R}_2^n$  can invert through two diastereomeric transition states – either through the (effectively)  $C_{2v}$  symmetric *cis*- or the corresponding *trans*-form, which is of (effective)  $D_{2h}$  symmetry. For all considered compounds, both isomers were identified as valid inversion transition states. In all cases, the *trans*-inversion transition state is energetically more favorable. The largest difference was found for  $\text{PH}_2(\text{NH}_2)_2^+$  (82 kJ mol<sup>-1</sup>), the smallest for  $\text{GaH}_2(\text{CH}_3)_2^-$  (4 kJ mol<sup>-1</sup>).

**Table S7:** Energies of the *cis*-configured inversion transition states of  $\text{EH}_2\text{R}_2^n$  relative to the *trans*-isomers with  $\text{E}^n = \text{Al}^-, \text{Si}, \text{P}^+, \text{Ga}^-, \text{Ge}, \text{As}^+$  and  $\text{R} = \text{F}, \text{Cl}, \text{Br}, \text{I}, \text{OH}, \text{NH}_2, \text{CH}_3, \text{CN}, \text{CCH}$ .

| Compound                        | Energy of the <i>cis</i> - versus the <i>trans</i> -inversion transition state [kJ mol <sup>-1</sup> ] | Compound                      | Energy of the <i>cis</i> - versus the <i>trans</i> -inversion transition state [kJ mol <sup>-1</sup> ] | Compound                        | Energy of the <i>cis</i> - versus the <i>trans</i> -inversion transition state [kJ mol <sup>-1</sup> ] |
|---------------------------------|--------------------------------------------------------------------------------------------------------|-------------------------------|--------------------------------------------------------------------------------------------------------|---------------------------------|--------------------------------------------------------------------------------------------------------|
| <b>Aluminum</b>                 |                                                                                                        | <b>Silicon</b>                |                                                                                                        | <b>Phosphorus</b>               |                                                                                                        |
| $\text{AlH}_2\text{F}_2^-$      | 18.04                                                                                                  | $\text{SiH}_2\text{F}_2$      | 42.44                                                                                                  | $\text{PH}_2\text{F}_2^+$       | 79.97                                                                                                  |
| $\text{AlH}_2\text{Cl}_2^-$     | 34.93                                                                                                  | $\text{SiH}_2\text{Cl}_2$     | 48.22                                                                                                  | $\text{PH}_2\text{Cl}_2^+$      | 68.86                                                                                                  |
| $\text{AlH}_2\text{Br}_2^-$     | 41.12                                                                                                  | $\text{SiH}_2\text{Br}_2$     | 47.03                                                                                                  | $\text{PH}_2\text{Br}_2^+$      | 61.15                                                                                                  |
| $\text{AlH}_2\text{I}_2^-$      | 45.71                                                                                                  | $\text{SiH}_2\text{I}_2$      | 42.32                                                                                                  | $\text{PH}_2\text{I}_2^+$       | 46.7                                                                                                   |
| $\text{AlH}_2(\text{OH})_2^-$   | 12.74                                                                                                  | $\text{SiH}_2(\text{OH})_2$   | 31.81                                                                                                  | $\text{PH}_2(\text{OH})_2^+$    | 68.11                                                                                                  |
| $\text{AlH}_2(\text{NH}_2)_2^-$ | 22.76                                                                                                  | $\text{SiH}_2(\text{NH}_2)_2$ | 44.24                                                                                                  | $\text{PH}_2(\text{NH}_2)_2^+$  | 81.66                                                                                                  |
| $\text{AlH}_2(\text{CH}_3)_2^-$ | 3.9                                                                                                    | $\text{SiH}_2(\text{CH}_3)_2$ | 8.21                                                                                                   | $\text{PH}_2(\text{CH}_3)_2^+$  | 20.67                                                                                                  |
| $\text{AlH}_2(\text{CN})_2^-$   | 14.4                                                                                                   | $\text{SiH}_2(\text{CN})_2$   | 15.83                                                                                                  | $\text{PH}_2(\text{CN})_2^+$    | 21.83                                                                                                  |
| $\text{AlH}_2(\text{CCH})_2^-$  | 6.62                                                                                                   | $\text{SiH}_2(\text{CCH})_2$  | 9.04                                                                                                   | $\text{PH}_2(\text{CCH})_2^+$   | 20.72                                                                                                  |
| <b>average</b>                  | 22.2                                                                                                   | <b>average</b>                | 32.1                                                                                                   | <b>average</b>                  | 52.2                                                                                                   |
| <b>Gallium</b>                  |                                                                                                        | <b>Germanium</b>              |                                                                                                        | <b>Arsenic</b>                  |                                                                                                        |
| $\text{GaH}_2\text{F}_2^-$      | 32.51                                                                                                  | $\text{GeH}_2\text{F}_2$      | 50.04                                                                                                  | $\text{AsH}_2\text{F}_2^+$      | 71.61                                                                                                  |
| $\text{GaH}_2\text{Cl}_2^-$     | 65.63                                                                                                  | $\text{GeH}_2\text{Cl}_2$     | 58.14                                                                                                  | $\text{AsH}_2\text{Cl}_2^+$     | 61.99                                                                                                  |
| $\text{GaH}_2\text{Br}_2^-$     | 72.22                                                                                                  | $\text{GeH}_2\text{Br}_2$     | 55.85                                                                                                  | $\text{AsH}_2\text{Br}_2^+$     | 54.3                                                                                                   |
| $\text{GaH}_2\text{I}_2^-$      | 76.98                                                                                                  | $\text{GeH}_2\text{I}_2$      | 48.67                                                                                                  | $\text{AsH}_2\text{I}_2^+$      | 40.07                                                                                                  |
| $\text{GaH}_2(\text{OH})_2^-$   | 12.12                                                                                                  | $\text{GeH}_2(\text{OH})_2$   | 27.76                                                                                                  | $\text{AsH}_2(\text{OH})_2^+$   | 51.94                                                                                                  |
| $\text{GaH}_2(\text{NH}_2)_2^-$ | 16.83                                                                                                  | $\text{GeH}_2(\text{NH}_2)_2$ | 34.84                                                                                                  | $\text{AsH}_2(\text{NH}_2)_2^+$ | 61.08                                                                                                  |
| $\text{GaH}_2(\text{CH}_3)_2^-$ | 3.58                                                                                                   | $\text{GeH}_2(\text{CH}_3)_2$ | 6.86                                                                                                   | $\text{AsH}_2(\text{CH}_3)_2^+$ | 13.38                                                                                                  |
| $\text{GaH}_2(\text{CN})_2^-$   | 32.99                                                                                                  | $\text{GeH}_2(\text{CN})_2$   | 24.2                                                                                                   | $\text{AsH}_2(\text{CN})_2^+$   | 23.28                                                                                                  |
| $\text{GaH}_2(\text{CCH})_2^-$  | 15.67                                                                                                  | $\text{GeH}_2(\text{CCH})_2$  | 12.01                                                                                                  | $\text{AsH}_2(\text{CCH})_2^+$  | 18.42                                                                                                  |
| <b>average</b>                  | 36.5                                                                                                   | <b>average</b>                | 35.4                                                                                                   | <b>average</b>                  | 44.0                                                                                                   |

## S9. Trends in the inversion barrier height along the degree of substitution

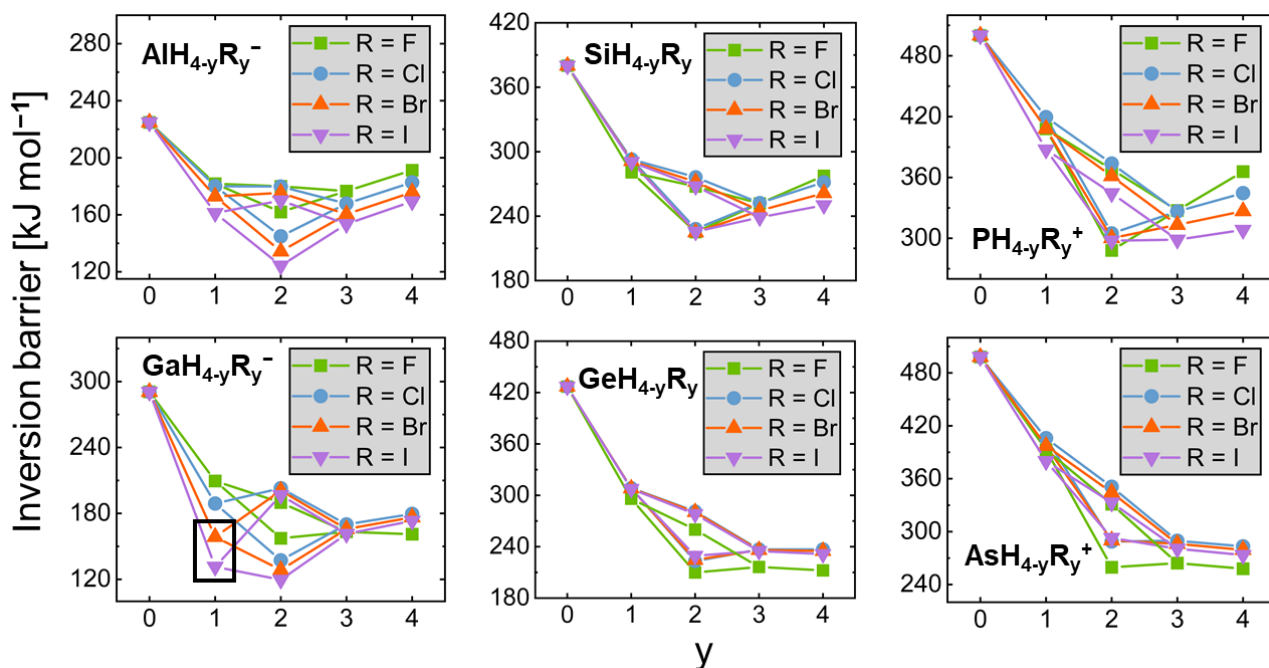

**Figure S2:** Trends in the inversion barrier height for  $\text{EH}_{4-y}\text{R}_y^n$  with  $\text{E}^n = \text{Al}^-, \text{Si}, \text{P}^+, \text{Ga}^-, \text{Ge}, \text{As}^+$  and  $y = 0, 1, 2, 3, 4$ ,  $\text{R} = \text{F}, \text{Cl}, \text{Br}, \text{I}$ . The transition structure optimization of  $\text{GaH}_3\text{Br}^-$  and  $\text{GaH}_3\text{I}^-$  converged to a dissociative structure ( $\text{GaH}_3 + \text{Br/I}^-$ ) and can thus not be compared with the other data points (marked with black box).

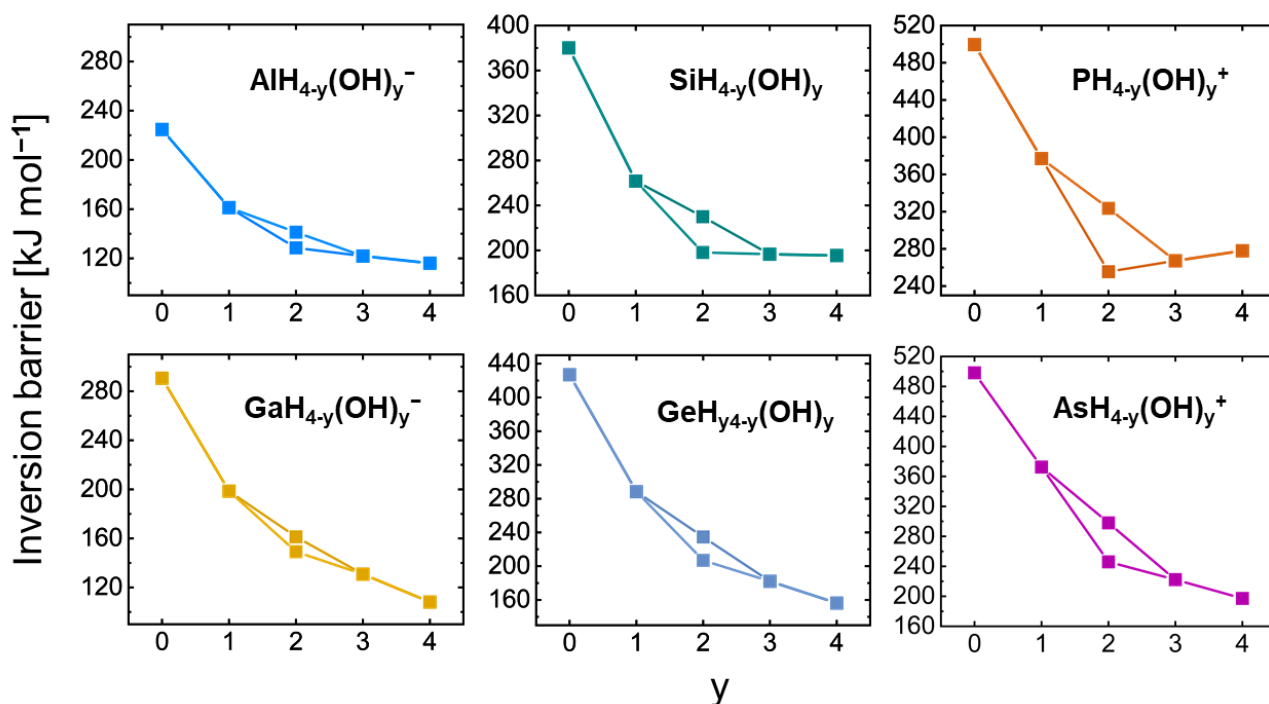

**Figure S3:** Trends in the inversion barrier height for  $\text{EH}_{4-y}(\text{OH})_y^n$  with  $\text{E}^n = \text{Al}^-, \text{Si}, \text{P}^+, \text{Ga}^-, \text{Ge}, \text{As}^+$  and  $y = 0, 1, 2, 3, 4$ ,  $\text{R} = \text{OH}$ .

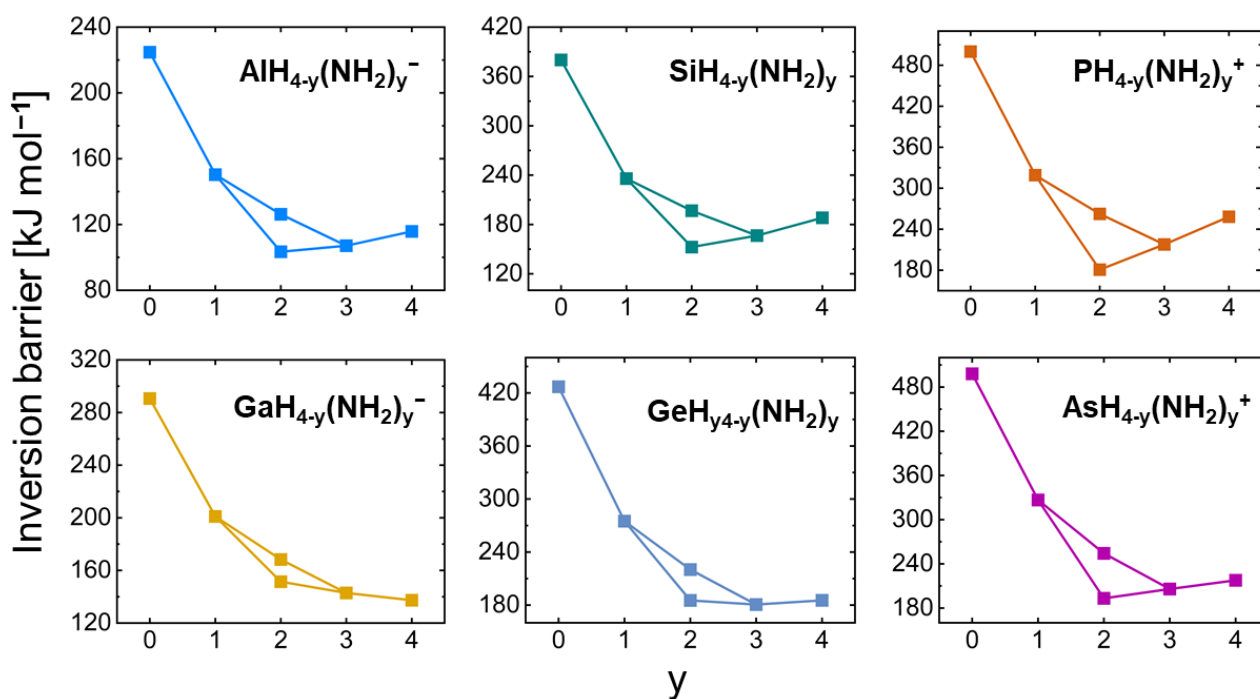

Figure S4: Trends in the inversion barrier height for  $\text{EH}_{4-y}\text{R}_y^n$  with  $\text{E}^n = \text{Al}^-, \text{Si}, \text{P}^+, \text{Ga}^-, \text{Ge}, \text{As}^+$  and  $y = 0, 1, 2, 3, 4$ ,  $\text{R} = \text{NH}_2$ .

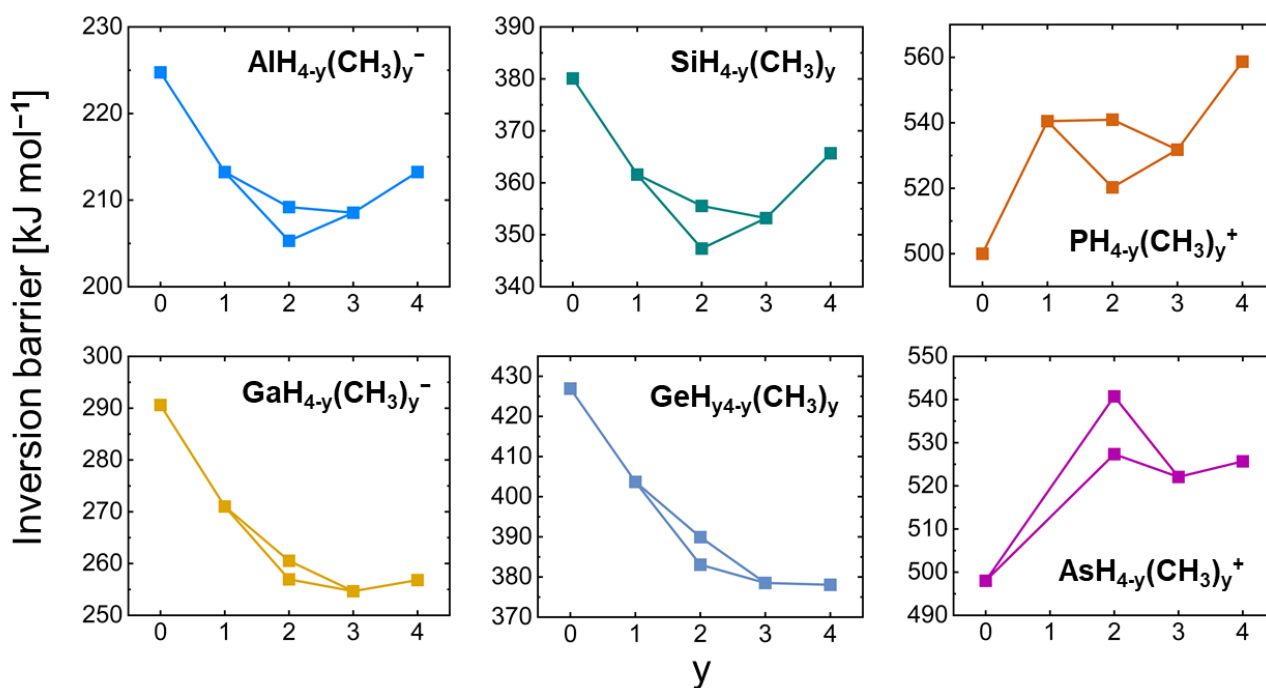

Figure S5: Trends in the inversion barrier height for  $\text{EH}_{4-y}\text{R}_y^n$  with  $\text{E}^n = \text{Al}^-, \text{Si}, \text{P}^+, \text{Ga}^-, \text{Ge}, \text{As}^+$  and  $y = 0, 1, 2, 3, 4$ ,  $\text{R} = \text{CH}_3$ . For  $\text{AsH}_3(\text{CH}_3)^+$ , no inversion transition state was found with the applied computational methodology.

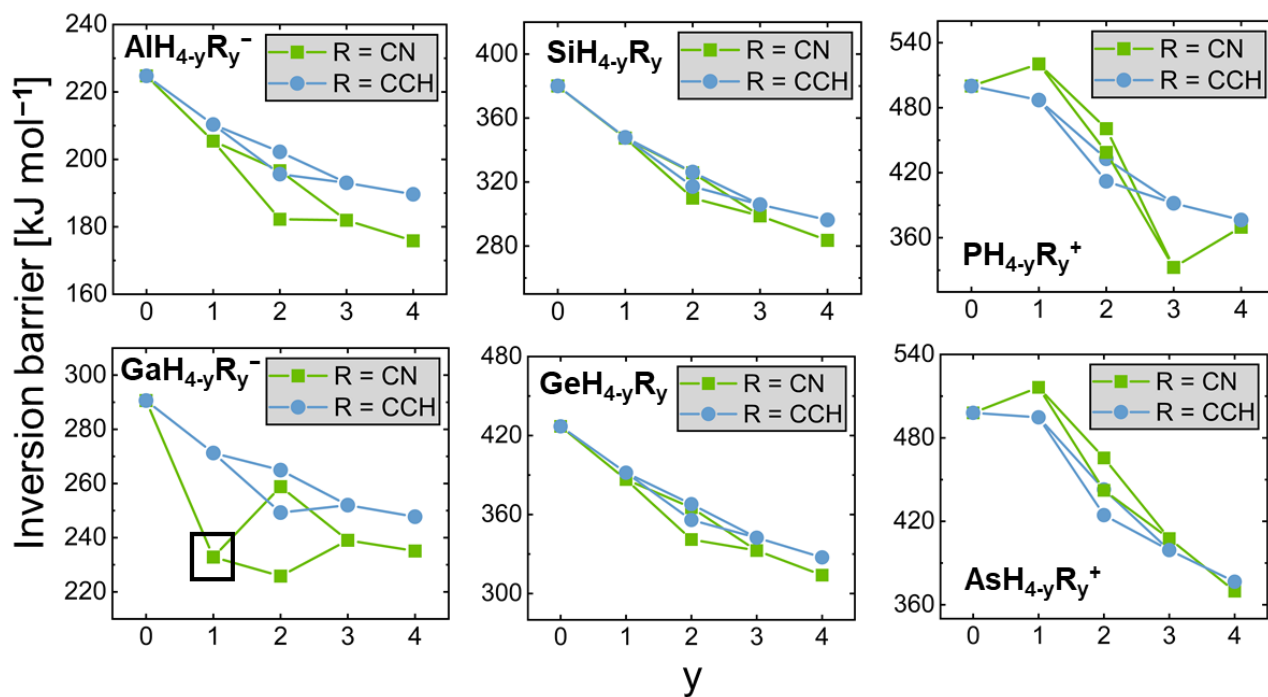

**Figure S6:** Trends in the inversion barrier height for  $\text{EH}_{4-y}\text{R}_y^n$  with  $\text{E}^n = \text{Al}^-, \text{Si}, \text{P}^+, \text{Ga}^-, \text{Ge}, \text{As}^+$  and  $y = 0, 1, 2, 3, 4$ ,  $\text{R} = \text{CN}, \text{CCH}$ . The transition structure optimization of  $\text{GaH}_3\text{CN}^-$  converged to a dissociative structure ( $\text{GaH}_3 + \text{CN}^-$ ) and can thus not be compared with the other data points (marked with black box).

## S10. Trends in the inversion barrier height with respect to the central element

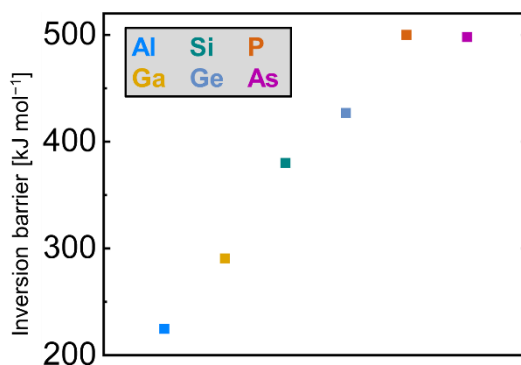

**Figure S7:** Trend in the inversion barrier height for  $\text{EH}_4^n$  with  $\text{E}^n = \text{Al}^-, \text{Si}, \text{P}^+, \text{Ga}^-, \text{Ge}, \text{As}^+$ . The transition states of  $\text{PH}_4^+$  and  $\text{AsH}_4^+$  were calculated on the NEVPT2/cc-pVQZ//CASSCF(8,8)/cc-pVTZ level of theory. They have an open-shell singlet electronic configuration ( $^1\text{B}_{2u}$  state).

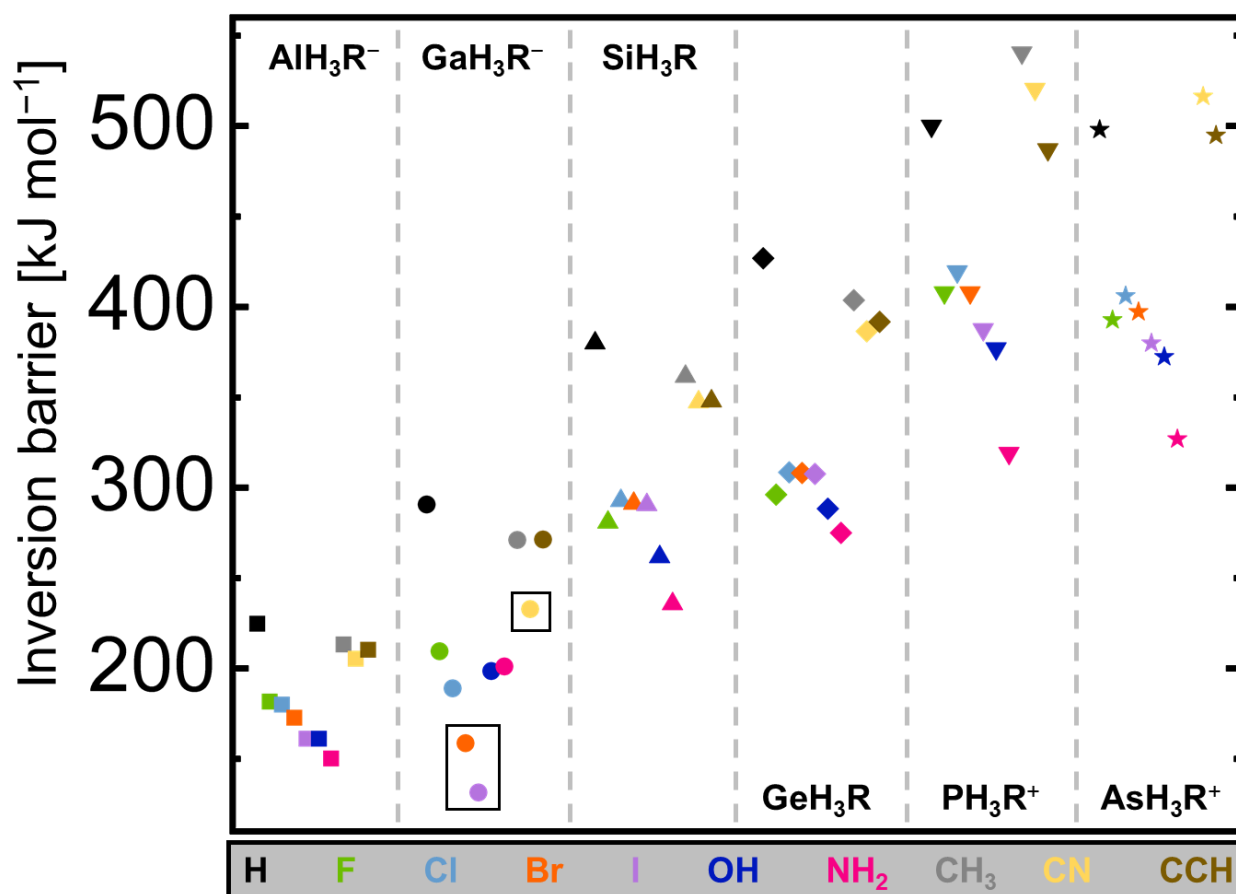

**Figure S8:** Trends in the inversion barrier height for  $\text{EH}_3\text{R}^n$  with  $\text{E}^n = \text{Al}^-, \text{Si}, \text{P}^+, \text{Ga}^-, \text{Ge}, \text{As}^+$  and  $\text{R} = \text{H}, \text{F}, \text{Cl}, \text{Br}, \text{I}, \text{OH}, \text{NH}_2, \text{CH}_3, \text{CN}, \text{CCH}$ . The transition structure optimization of  $\text{GaH}_3\text{Br}^-$ ,  $\text{GaH}_3\text{I}^-$ , and  $\text{GaH}_3\text{CN}^-$  converged to a dissociative structure ( $\text{GaH}_3 + \text{Br}^-/\text{I}^-/\text{CN}^-$ ) and can thus not be compared with the other data points (marked with black box).



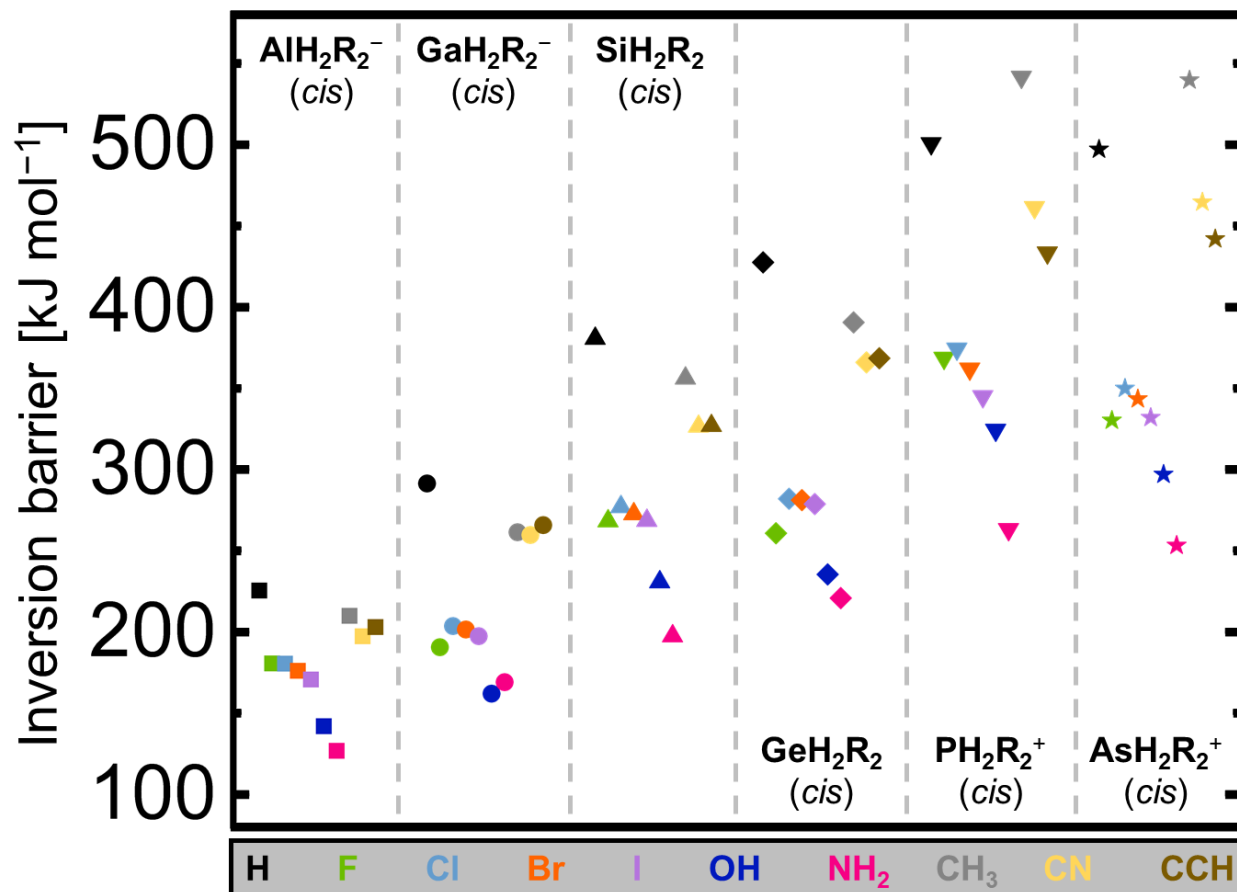

**Figure S9:** Trends in the inversion barrier height for  $\text{EH}_2\text{R}_2^n$  with  $\text{E}^n = \text{Al}^-$ , Si, P<sup>+</sup>, Ga<sup>-</sup>, Ge, As<sup>+</sup> and R = H, F, Cl, Br, I, OH,  $\text{NH}_2$ ,  $\text{CH}_3$ , CN, CCH considering the *cis*-configured inversion transition states.

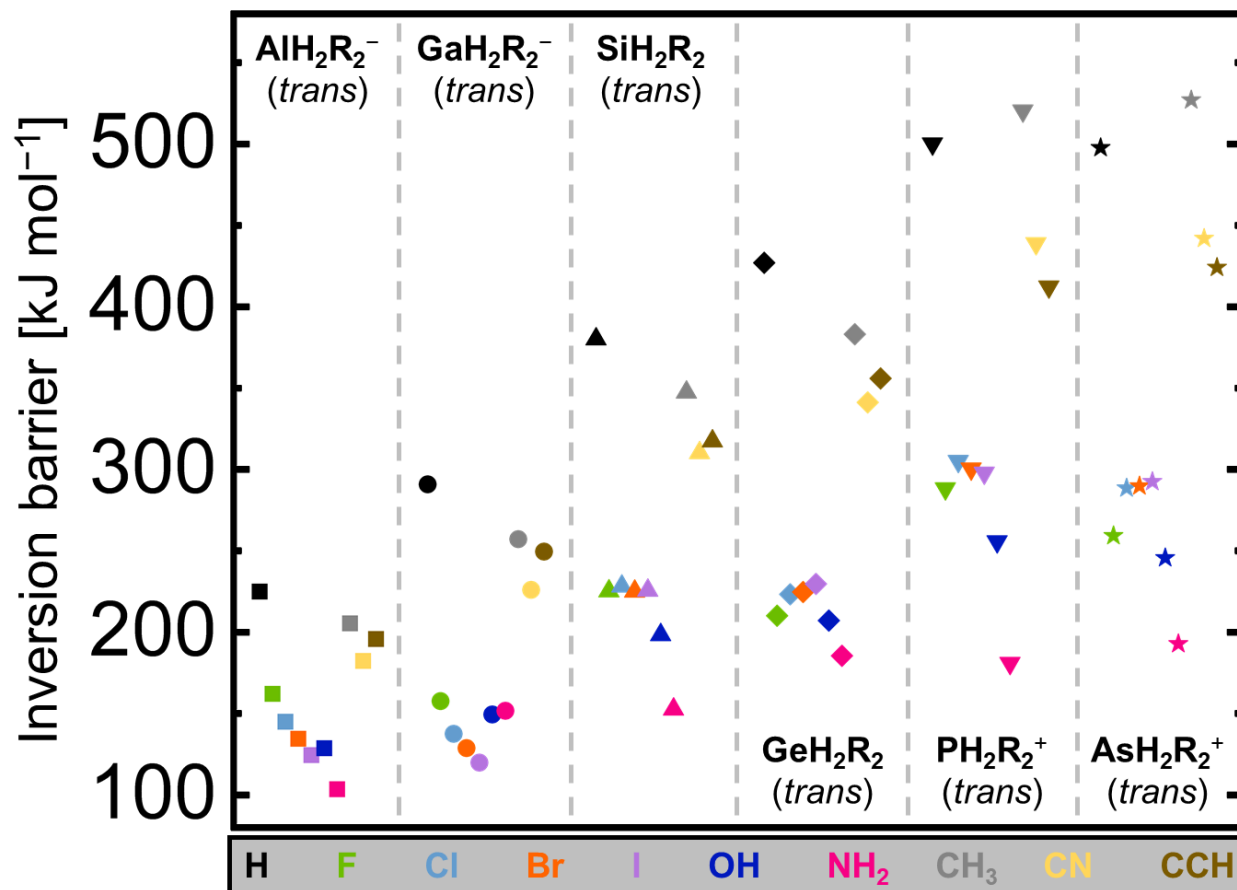

**Figure S10:** Trends in the inversion barrier height for  $\text{EH}_2\text{R}_2^n$  with  $\text{E}^n = \text{Al}^-$ , Si,  $\text{P}^+$ ,  $\text{Ga}^-$ , Ge,  $\text{As}^+$  and  $\text{R} = \text{H}$ , F, Cl, Br, I, OH,  $\text{NH}_2$ ,  $\text{CH}_3$ , CN, CCH considering the *trans*-configured inversion transition states.

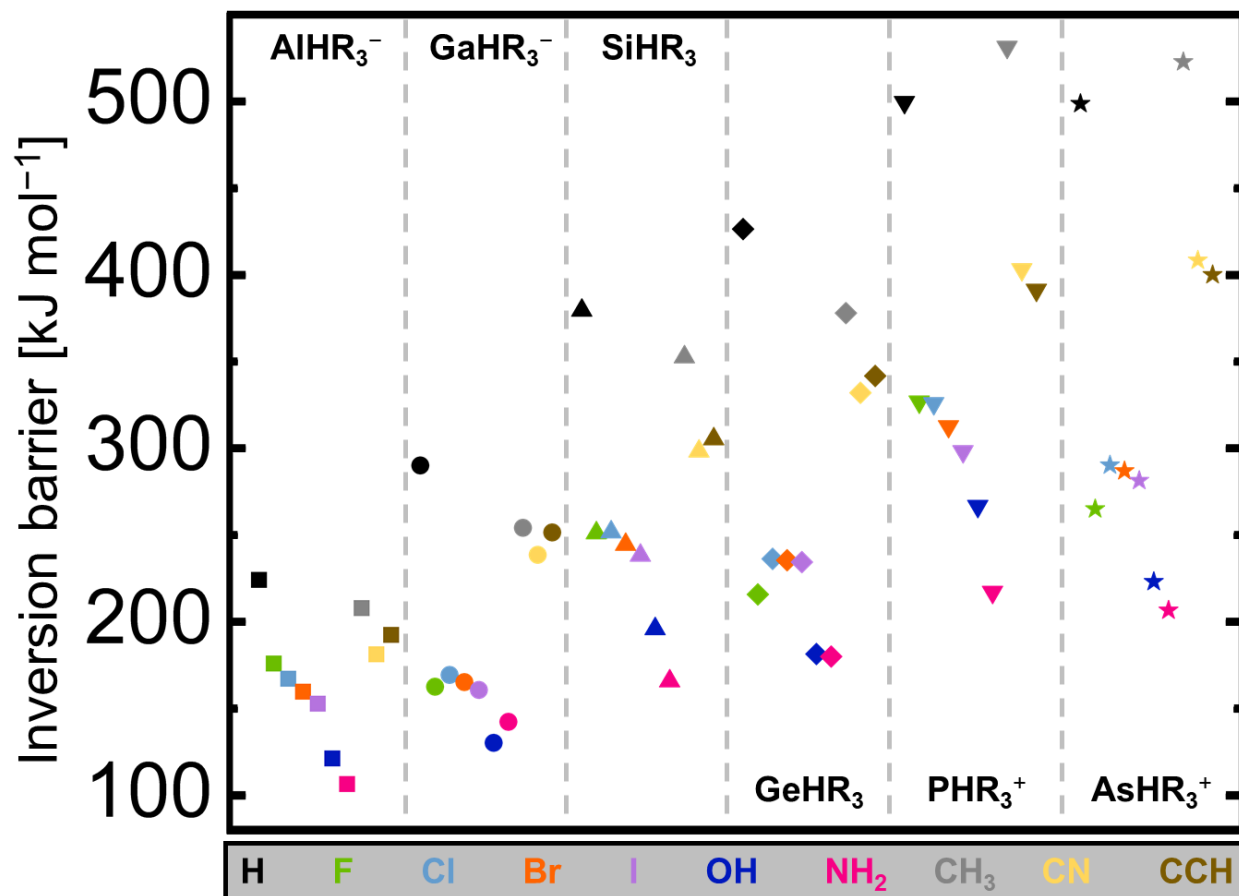

Figure S11: Trends in the inversion barrier height for  $\text{EHR}_3^n$  with  $\text{E} = \text{Al}^-, \text{Si}, \text{P}^+, \text{Ga}^-, \text{Ge}, \text{As}^+$  and  $\text{R} = \text{H}, \text{F}, \text{Cl}, \text{Br}, \text{I}, \text{OH}, \text{NH}_2, \text{CH}_3, \text{CN}, \text{CCH}$ .

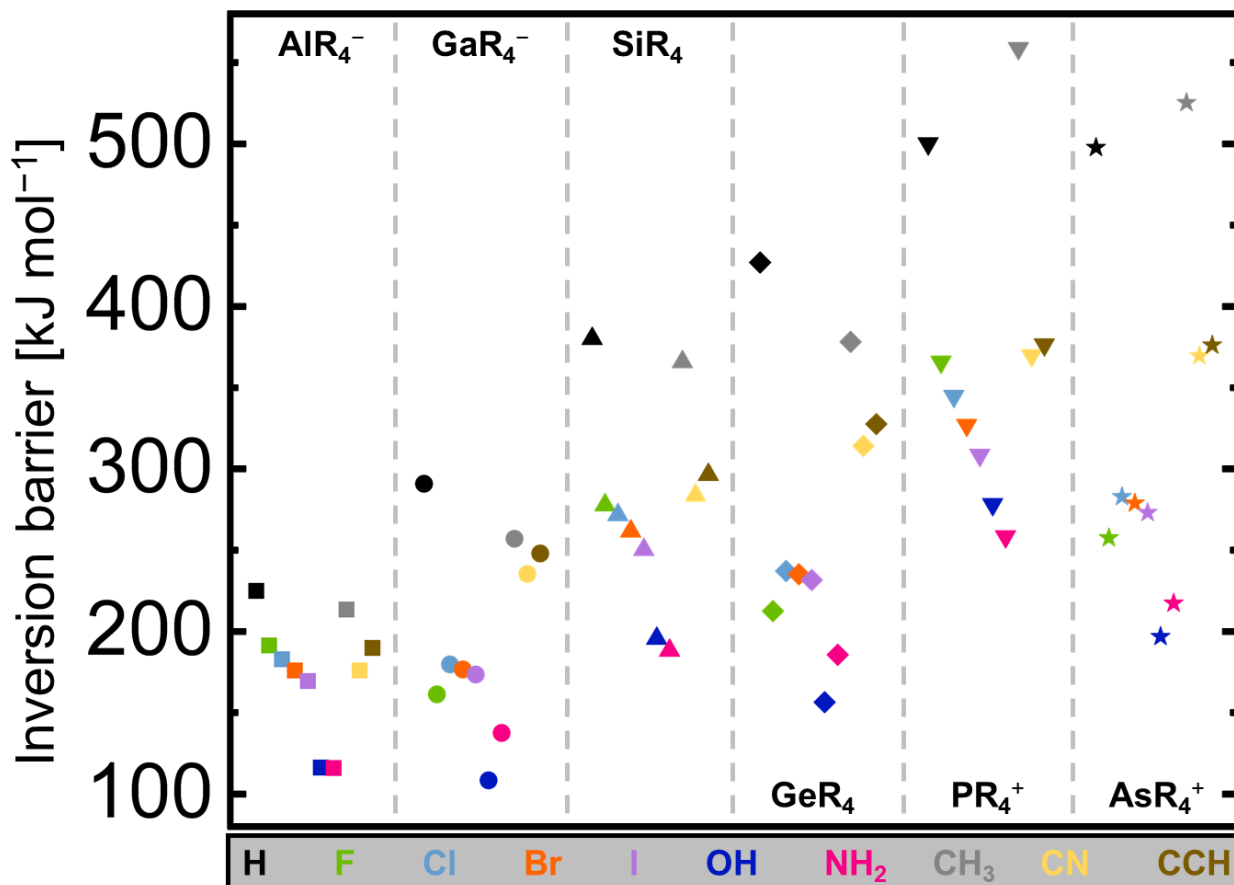

Figure S12: Trends in the inversion barrier height for  $ER_4^n$  with  $E^n = Al^-, Si, P^+, Ga^-, Ge, As^+$  and  $R = H, F, Cl, Br, I, OH, NH_2, CH_3, CN, CCH$ .

### S11. Inversion transition structures of $EH_{4-y}(OH)_y^n$

The isomeric inversion transition structures of  $EH_{4-y}(OH)_y^n$  with  $E^n = Al^-, Si, P^+, Ga^-, Ge, As^+$  and  $y = 0, 1, 2, 3, 4$  were investigated. For the transition structures of  $EH_{4-y}(OH)_y^n$  with *cis*-configuration, three conformers were considered (Figure S13A) whereas for the corresponding *trans*-isomers, two conformers were of relevance (Figure S13B). Regarding  $EH_{4-y}(OH)_y^n$ , four different transition structures were investigated (Figure S13C). All conformers were obtained through transition structure optimization and were confirmed as valid inversion transition states by frequency calculations.

The two possible *trans*-structures are essentially isoenergetic (Table S8). The *cis*-structures which possess a hydrogen bond (*cis*-TS1- $EH_2(OH)_2^n$ ) are favored over the two others without a hydrogen bond (Table S8). Comparing *cis* and *trans*-transition states, the *trans*-version is favored, as it is for all other substituents, too (see Table S7). To estimate the influence of hydrogen bonding, the  $EH(OH)_3^n$  class of compounds was used. TS1- $EH(OH)_3^n$  was compared with TS2- $EH(OH)_3^n$  and TS3- $EH(OH)_3^n$  with TS4- $EH(OH)_3^n$ . It was found that the two energy differences are of comparable size (Table S9). Their mean was thus interpreted as the energetically stabilizing influence of one hydrogen bond.

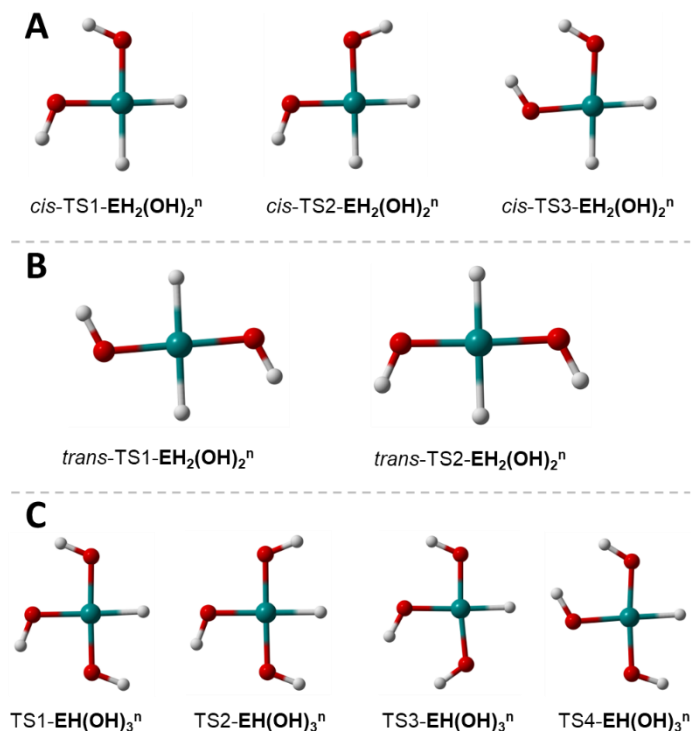

**Figure S13:** Molecular representations of the possible inversion transition structures of **A, B**)  $\text{EH}_2(\text{OH})_2^n$  and of **C**)  $\text{EH}(\text{OH})_3^n$ , with  $\text{E}^n = \text{Al}^-, \text{Si}, \text{P}^+, \text{Ga}^-, \text{Ge}, \text{As}^+$ .

**Table S8:** Inversion transition state energies of the *cis/trans*- $\text{EH}_2(\text{OH})_2^n$  class of compounds relative to *trans*-TS1- $\text{EH}_2(\text{OH})_2^n$  and *cis*-TS1- $\text{EH}_2(\text{OH})_2^n$ , with  $\text{E}^n = \text{Al}^-, \text{Si}, \text{P}^+, \text{Ga}^-, \text{Ge}, \text{As}^+$ .

| Element                                                                       | Compound                                                       | Relative energy [kJ mol <sup>-1</sup> ] |
|-------------------------------------------------------------------------------|----------------------------------------------------------------|-----------------------------------------|
| <b><i>trans</i>-TS-[<math>\text{EH}_2(\text{OH})_2</math>]<sup>-0/+</sup></b> |                                                                |                                         |
| Al                                                                            | <i>trans</i> -TS1-[ $\text{AlH}_2(\text{OH})_2$ ] <sup>-</sup> | 0.0                                     |
|                                                                               | <i>trans</i> -TS2-[ $\text{AlH}_2(\text{OH})_2$ ] <sup>-</sup> | -0.3                                    |
| Ga                                                                            | <i>trans</i> -TS1-[ $\text{GaH}_2(\text{OH})_2$ ] <sup>-</sup> | 0.0                                     |
|                                                                               | <i>trans</i> -TS2-[ $\text{GaH}_2(\text{OH})_2$ ] <sup>-</sup> | -0.5                                    |
| Si                                                                            | <i>trans</i> -TS1-[ $\text{SiH}_2(\text{OH})_2$ ]              | 0.0                                     |
|                                                                               | <i>trans</i> -TS2-[ $\text{SiH}_2(\text{OH})_2$ ]              | 0.9                                     |
| Ge                                                                            | <i>trans</i> -TS1-[ $\text{GeH}_2(\text{OH})_2$ ]              | 0.0                                     |
|                                                                               | <i>trans</i> -TS2-[ $\text{GeH}_2(\text{OH})_2$ ]              | 0.7                                     |
| P                                                                             | <i>trans</i> -TS1-[ $\text{PH}_2(\text{OH})_2$ ] <sup>+</sup>  | 0.0                                     |
|                                                                               | <i>trans</i> -TS2-[ $\text{PH}_2(\text{OH})_2$ ] <sup>+</sup>  | 1.7                                     |
| As                                                                            | <i>trans</i> -TS1-[ $\text{AsH}_2(\text{OH})_2$ ] <sup>+</sup> | 0.0                                     |
|                                                                               | <i>trans</i> -TS2-[ $\text{AsH}_2(\text{OH})_2$ ] <sup>+</sup> | 1.2                                     |
| <b><i>cis</i>-TS-[<math>\text{EH}_2(\text{OH})_2</math>]<sup>-0/+</sup></b>   |                                                                |                                         |
| Al                                                                            | <i>cis</i> -TS1-[ $\text{AlH}_2(\text{OH})_2$ ] <sup>-</sup>   | 0.0                                     |
|                                                                               | <i>cis</i> -TS2-[ $\text{AlH}_2(\text{OH})_2$ ] <sup>-</sup>   | 3.1                                     |
|                                                                               | <i>cis</i> -TS3-[ $\text{AlH}_2(\text{OH})_2$ ] <sup>-</sup>   | 19.6                                    |
| Ga                                                                            | <i>cis</i> -TS1-[ $\text{GaH}_2(\text{OH})_2$ ] <sup>-</sup>   | 0.0                                     |
|                                                                               | <i>cis</i> -TS2-[ $\text{GaH}_2(\text{OH})_2$ ] <sup>-</sup>   | 8.9                                     |
|                                                                               | <i>cis</i> -TS3-[ $\text{GaH}_2(\text{OH})_2$ ] <sup>-</sup>   | 16.3                                    |
| Si                                                                            | <i>cis</i> -TS1-[ $\text{SiH}_2(\text{OH})_2$ ]                | 0.0                                     |
|                                                                               | <i>cis</i> -TS2-[ $\text{SiH}_2(\text{OH})_2$ ]                | 8.8                                     |
|                                                                               | <i>cis</i> -TS3-[ $\text{SiH}_2(\text{OH})_2$ ]                | 18.6                                    |
| Ge                                                                            | <i>cis</i> -TS1-[ $\text{GeH}_2(\text{OH})_2$ ]                | 0.0                                     |

|    |                                                                    |      |
|----|--------------------------------------------------------------------|------|
|    | <i>cis</i> -TS2-[GeH <sub>2</sub> (OH) <sub>2</sub> ]              | 13.7 |
|    | <i>cis</i> -TS3-[GeH <sub>2</sub> (OH) <sub>2</sub> ]              | 13.7 |
| P  | <i>cis</i> -TS1-[PH <sub>2</sub> (OH) <sub>2</sub> ] <sup>+</sup>  | 0.0  |
|    | <i>cis</i> -TS2-[PH <sub>2</sub> (OH) <sub>2</sub> ] <sup>+</sup>  | 14.9 |
|    | <i>cis</i> -TS3-[PH <sub>2</sub> (OH) <sub>2</sub> ] <sup>+</sup>  | 17.1 |
| As | <i>cis</i> -TS1-[AsH <sub>2</sub> (OH) <sub>2</sub> ] <sup>+</sup> | 0.0  |
|    | <i>cis</i> -TS2-[AsH <sub>2</sub> (OH) <sub>2</sub> ] <sup>+</sup> | 18.4 |
|    | <i>cis</i> -TS3-[AsH <sub>2</sub> (OH) <sub>2</sub> ] <sup>+</sup> | 11.5 |

**Table S9:** Inversion transition state energies of the **EH(OH)<sub>3</sub><sup>n</sup>** class of compounds relative to TS1-**EH(OH)<sub>3</sub><sup>n</sup>**, with **E<sup>n</sup>** = Al<sup>-</sup>, Si, P<sup>+</sup>, Ga<sup>-</sup>, Ge, As<sup>+</sup>. The last column gives the difference in energy between TS1 compared to TS2 and TS3 compared to TS4 which was used to estimate the influence of hydrogen bonding.

| Element                                        | Compound                                               | Relative energy [kJ mol <sup>-1</sup> ] | Energy difference between TS1/2 and TS3/4 [kJ mol <sup>-1</sup> ] |
|------------------------------------------------|--------------------------------------------------------|-----------------------------------------|-------------------------------------------------------------------|
| <b>TS-[EH(OH)<sub>3</sub>]<sup>-/0/+</sup></b> |                                                        |                                         |                                                                   |
| Al                                             | <i>trans</i> -TS1-[AlH(OH) <sub>3</sub> ] <sup>-</sup> | 0.0                                     | 5.2                                                               |
|                                                | <i>trans</i> -TS2-[AlH(OH) <sub>3</sub> ] <sup>-</sup> | 5.2                                     |                                                                   |
|                                                | <i>trans</i> -TS3-[AlH(OH) <sub>3</sub> ] <sup>-</sup> | 17.9                                    |                                                                   |
|                                                | <i>trans</i> -TS4-[AlH(OH) <sub>3</sub> ] <sup>-</sup> | 22.6                                    |                                                                   |
| Ga                                             | <i>trans</i> -TS1-[GaH(OH) <sub>3</sub> ] <sup>-</sup> | 0.0                                     | 10.3                                                              |
|                                                | <i>trans</i> -TS2-[GaH(OH) <sub>3</sub> ] <sup>-</sup> | 10.3                                    |                                                                   |
|                                                | <i>trans</i> -TS3-[GaH(OH) <sub>3</sub> ] <sup>-</sup> | 13.2                                    |                                                                   |
|                                                | <i>trans</i> -TS4-[GaH(OH) <sub>3</sub> ] <sup>-</sup> | 23.5                                    |                                                                   |
| Si                                             | <i>trans</i> -TS1-[SiH(OH) <sub>3</sub> ]              | 0.0                                     | 13.0                                                              |
|                                                | <i>trans</i> -TS2-[SiH(OH) <sub>3</sub> ]              | 13.0                                    |                                                                   |
|                                                | <i>trans</i> -TS3-[SiH(OH) <sub>3</sub> ]              | 17.8                                    |                                                                   |
|                                                | <i>trans</i> -TS4-[SiH(OH) <sub>3</sub> ]              | 28.7                                    |                                                                   |
| Ge                                             | <i>trans</i> -TS1-[GeH(OH) <sub>3</sub> ]              | 0.0                                     | 16.1                                                              |
|                                                | <i>trans</i> -TS2-[GeH(OH) <sub>3</sub> ]              | 16.1                                    |                                                                   |
|                                                | <i>trans</i> -TS3-[GeH(OH) <sub>3</sub> ]              | 12.3                                    |                                                                   |
|                                                | <i>trans</i> -TS4-[GeH(OH) <sub>3</sub> ]              | 26.9                                    |                                                                   |
| P                                              | <i>trans</i> -TS1-[PH(OH) <sub>3</sub> ] <sup>+</sup>  | 0.0                                     | 22.3                                                              |
|                                                | <i>trans</i> -TS2-[PH(OH) <sub>3</sub> ] <sup>+</sup>  | 22.3                                    |                                                                   |
|                                                | <i>trans</i> -TS3-[PH(OH) <sub>3</sub> ] <sup>+</sup>  | 16.0                                    |                                                                   |
|                                                | <i>trans</i> -TS4-[PH(OH) <sub>3</sub> ] <sup>+</sup>  | 34.8                                    |                                                                   |
| As                                             | <i>trans</i> -TS1-[AsH(OH) <sub>3</sub> ] <sup>+</sup> | 0.0                                     | 22.7                                                              |
|                                                | <i>trans</i> -TS1-[AsH(OH) <sub>3</sub> ] <sup>+</sup> | 22.7                                    |                                                                   |
|                                                | <i>trans</i> -TS1-[AsH(OH) <sub>3</sub> ] <sup>+</sup> | 10.1                                    |                                                                   |
|                                                | <i>trans</i> -TS1-[AsH(OH) <sub>3</sub> ] <sup>+</sup> | 30.2                                    |                                                                   |

## S12. Comparison of HOMO-LUMO gaps and TDDFT data

TDDFT calculations were carried out as described in Chapter S1. The energy differences between the highest occupied and lowest unoccupied molecular orbital obtained from the B97M-D3(BJ)/cc-pVTZ level were compared to the first vertical excitation energies from TDDFT calculations using the same computational method. This was done for a subset of the investigated inversion transition states, namely for  $\text{EH}_4^n$  (4 structures),  $\text{EH}_{4-y}\text{F}_y^n$ , with  $y = 1, 4$  (12 structures), and  $\text{EH}_{4-y}(\text{CN})_y^n$ , with  $y = 1, 2, 3, 4$  (30 structures). In all cases, the lowest vertical excitation corresponded to more than 95% to the HOMO-LUMO transition. The HOMO-LUMO gaps were found to correlate well with the first vertical excitation energies, and therefore the former were used to analyze the entire set of molecules.

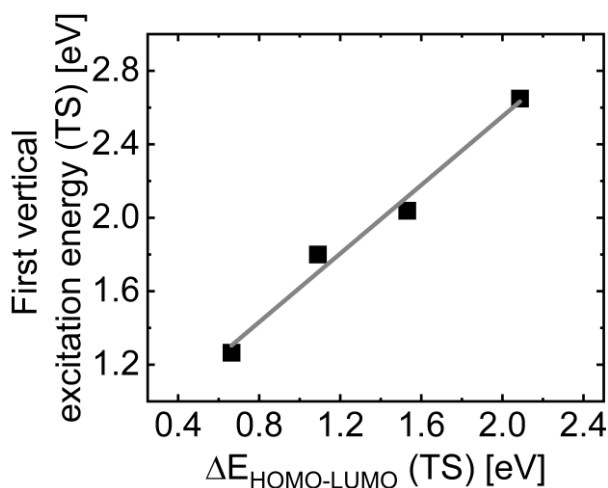

**Figure S14:** Correlation plot ( $R^2 = 0.9827$ ) for the first vertical excitation energy versus the HOMO-LUMO gap of the inversion transition states of  $\text{EH}_4^n$ , with  $E^n = \text{Al}^+, \text{Si}, \text{Ga}^-, \text{Ge}$ .

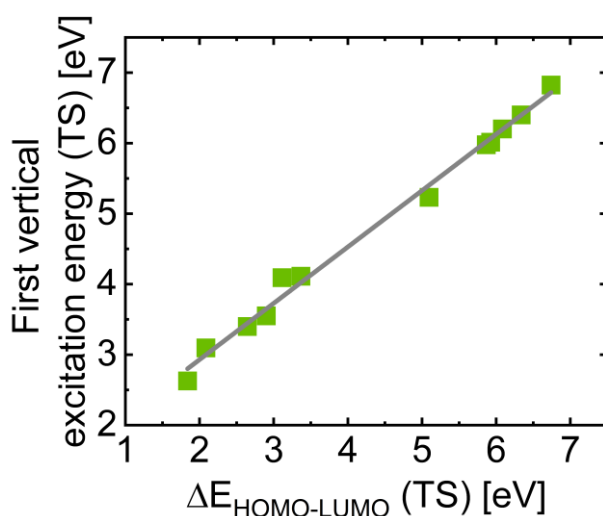

**Figure S15:** Correlation plot ( $R^2 = 0.9924$ ) for the first vertical excitation energy versus the HOMO-LUMO gap of the inversion transition states of  $\text{EH}_{4-y}\text{F}_y^n$ , with  $E^n = \text{Al}^+, \text{Si}, \text{P}^+, \text{Ga}^-, \text{Ge}, \text{As}^+$  and  $y = 1, 4$ .

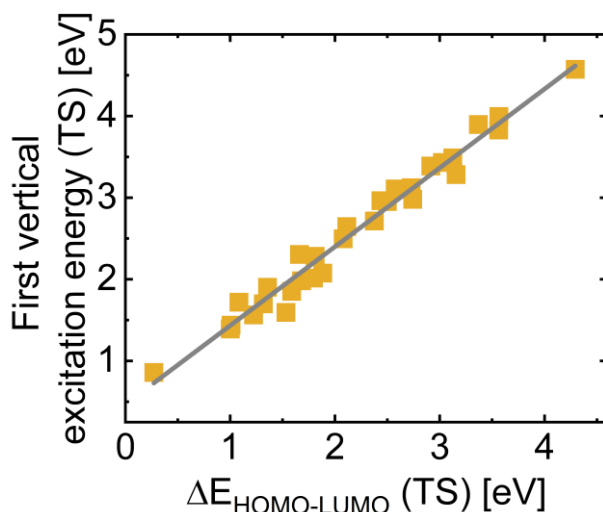

**Figure S16:** Correlation plot ( $R^2 = 0.9761$ ) for the first vertical excitation energy *versus* the HOMO-LUMO gap of the inversion transition states of  $\text{EH}_{4-y}(\text{CN})_y^n$ , with  $\text{E}^n = \text{Al}^-, \text{Si}, \text{P}^+, \text{Ga}^-, \text{Ge}, \text{As}^+$  and  $y = 1, 2, 3, 4$ .

### S13. Correlation plots of inversion barrier heights against transition state HOMO-LUMO gaps

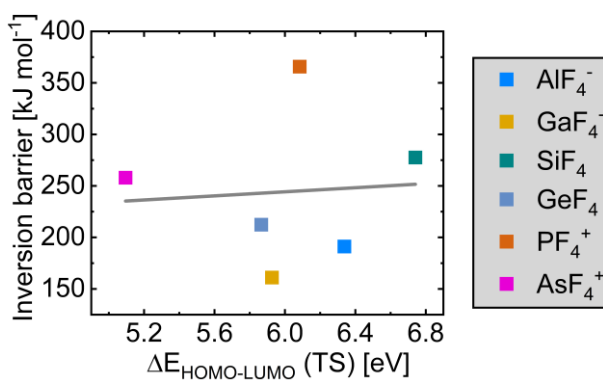

**Figure S17:** Correlation plot ( $R^2 = 0.0055$ ) of the inversion barrier heights *versus* the HOMO-LUMO gap in the inversion transition state for  $\text{EF}_4^n$ ,  $\text{E}^n = \text{Al}^-, \text{Si}, \text{P}^+, \text{Ga}^-, \text{Ge}, \text{As}^+$ .

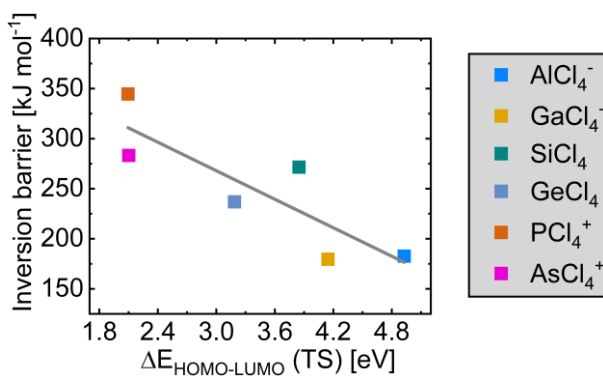

**Figure S18:** Correlation plot ( $R^2 = 0.7279$ ) of the inversion barrier heights *versus* the HOMO-LUMO gap in the inversion transition state for  $\text{ECl}_4^n$ ,  $\text{E}^n = \text{Al}^-, \text{Si}, \text{P}^+, \text{Ga}^-, \text{Ge}, \text{As}^+$ .



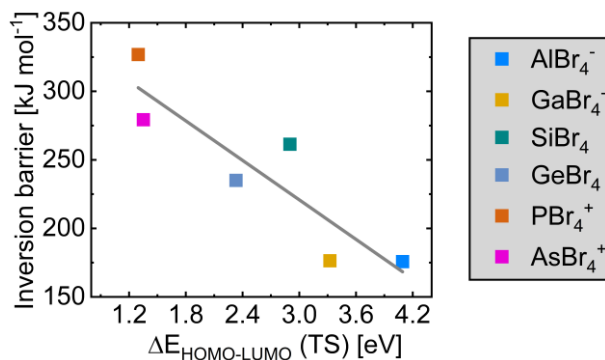

**Figure S19:** Correlation plot ( $R^2 = 0.8018$ ) of the inversion barrier heights *versus* the HOMO-LUMO gap in the inversion transition state for  $\text{EBr}_4^n$ ,  $\text{E}^n = \text{Al}^-, \text{Si}, \text{P}^+, \text{Ga}^-, \text{Ge}, \text{As}^+$ .

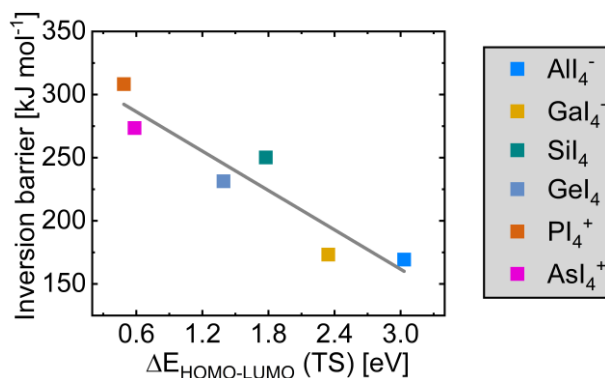

**Figure S20:** Correlation plot ( $R^2 = 0.8782$ ) of the inversion barrier heights *versus* the HOMO-LUMO gap in the inversion transition state for  $\text{EI}_4^n$ ,  $\text{E}^n = \text{Al}^-, \text{Si}, \text{P}^+, \text{Ga}^-, \text{Ge}, \text{As}^+$ .

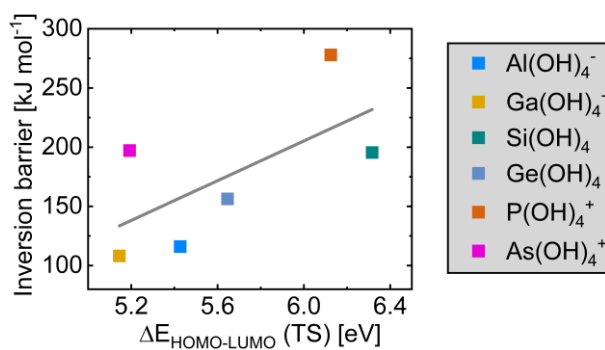

**Figure S21:** Correlation plot ( $R^2 = 0.4210$ ) of the inversion barrier heights *versus* the HOMO-LUMO gap in the inversion transition state for  $\text{E(OH)}_4^n$ ,  $\text{E}^n = \text{Al}^-, \text{Si}, \text{P}^+, \text{Ga}^-, \text{Ge}, \text{As}^+$ .

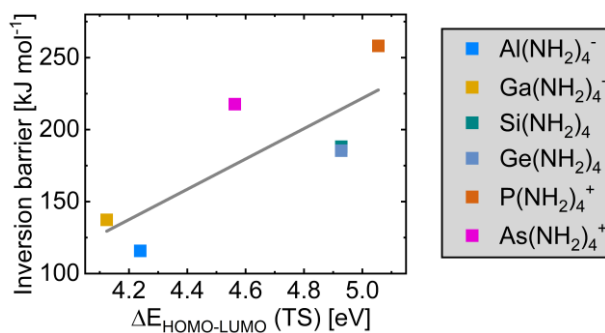

**Figure S22:** Correlation plot ( $R^2 = 0.6344$ ) of the inversion barrier heights *versus* the HOMO-LUMO gap in the inversion transition state for  $\text{E(NH}_2)_4^n$ ,  $\text{E}^n = \text{Al}^-, \text{Si}, \text{P}^+, \text{Ga}^-, \text{Ge}, \text{As}^+$ .

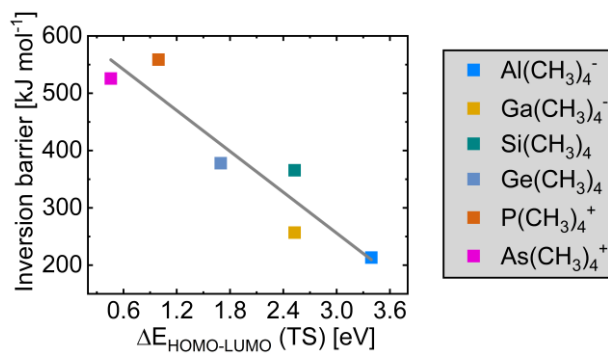

**Figure S23:** Correlation plot ( $R^2 = 0.8732$ ) of the inversion barrier heights versus the HOMO-LUMO gap in the inversion transition state for  $\text{E}(\text{CH}_3)_4^n$ ,  $\text{E}^n = \text{Al}^-, \text{Si}, \text{P}^+, \text{Ga}^-, \text{Ge}, \text{As}^+$ .

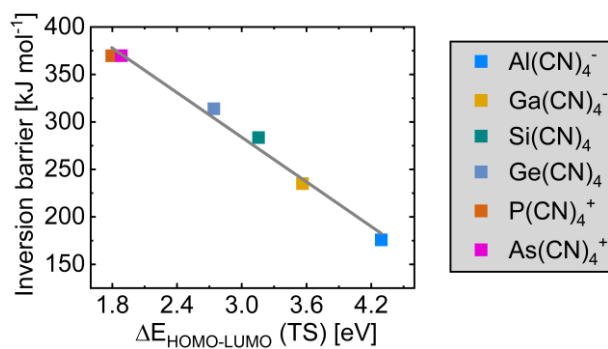

**Figure S24:** Correlation plot ( $R^2 = 0.9870$ ) of the inversion barrier heights versus the HOMO-LUMO gap in the inversion transition state for  $\text{E}(\text{CN})_4^n$ ,  $\text{E}^n = \text{Al}^-, \text{Si}, \text{P}^+, \text{Ga}^-, \text{Ge}, \text{As}^+$ .

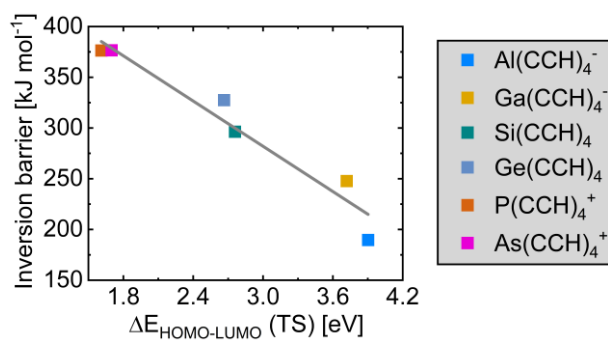

**Figure S25:** Correlation plot ( $R^2 = 0.9442$ ) of the inversion barrier heights versus the HOMO-LUMO gap in the inversion transition state for  $\text{E}(\text{CCH})_4^n$ ,  $\text{E}^n = \text{Al}^-, \text{Si}, \text{P}^+, \text{Ga}^-, \text{Ge}, \text{As}^+$ .

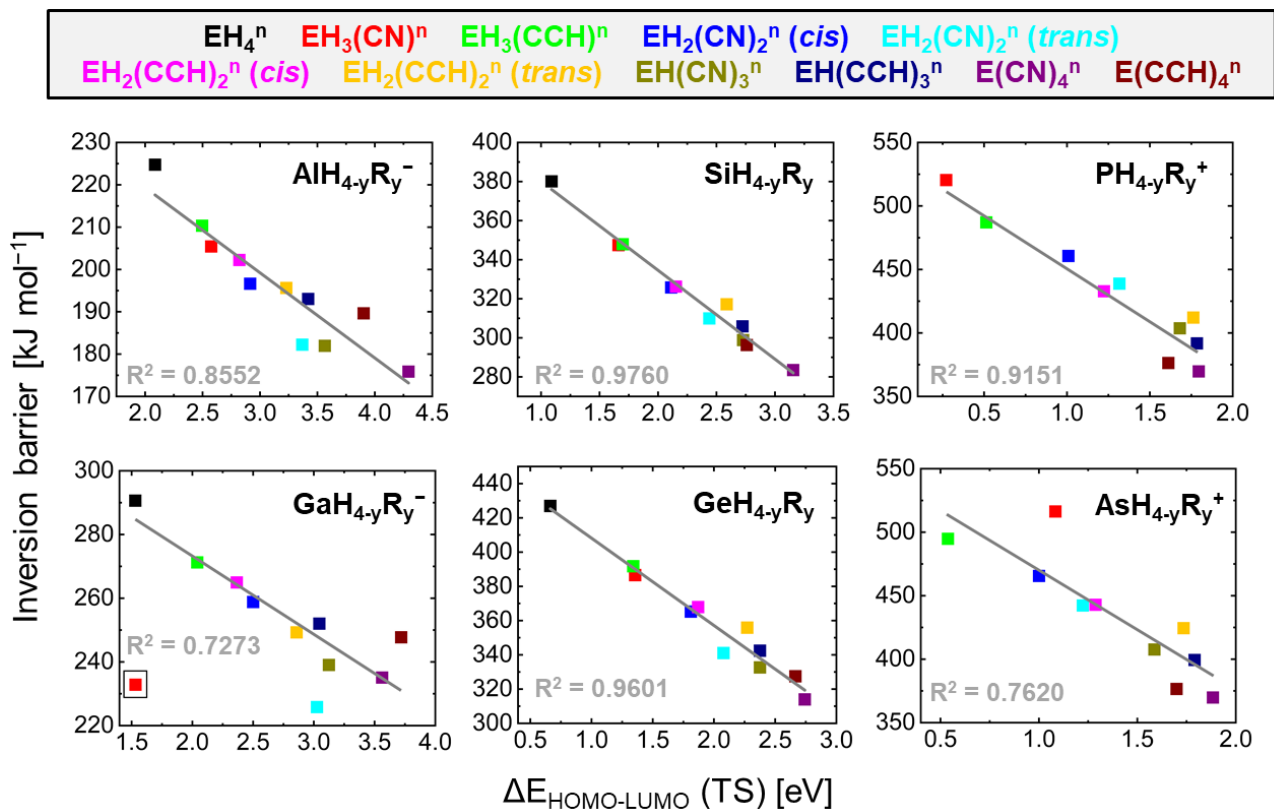

**Figure S26:** Correlation plots of the inversion barrier height versus the Kohn-Sham HOMO-LUMO gap in the inversion transition state for  $\text{EH}_{4-y}\text{R}_y^n$ ,  $\text{E}^n = \text{Al}^-, \text{Si}, \text{P}^+, \text{Ga}^-, \text{Ge}, \text{As}^+$  and  $\text{R} = \text{CN}, \text{CCH}$ ,  $y = 0, 1, 2, 3, 4$ . The data point for  $\text{GaH}_3\text{CN}^-$  (marked with a box) was not included in the linear regression as the transition structure optimization converged to a dissociative structure.

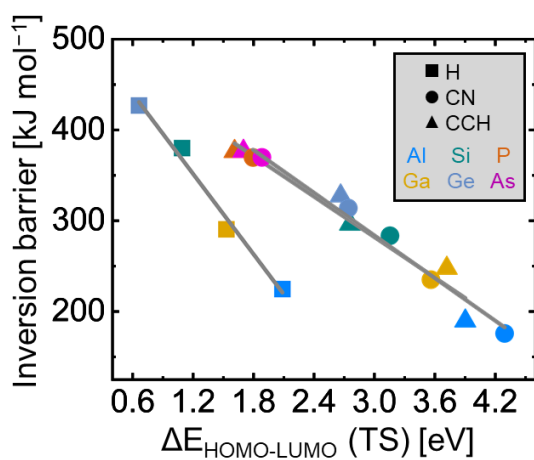

**Figure S27:** Comparison of the correlation of the inversion barrier height versus the Kohn-Sham HOMO-LUMO gap in the inversion transition state for  $\text{ER}_4^n$ ,  $\text{E}^n = \text{Al}^-, \text{Si}, \text{P}^+, \text{Ga}^-, \text{Ge}, \text{As}^+$  and  $\text{R} = \text{H}, \text{CN}, \text{CCH}$ .

## S14. Natural bond orbital analyses

Natural bond orbital (NBO) analyses were carried out as described in Chapter S1.

**Table S10:** Natural charges of the central element of the ground and inversion transition state of  $ER_4^n$  with  $E^n = Al^-, Si, P^+, Ga^-, Ge, As^+$  and  $R = H, F, Cl, Br, I, OH, NH_2, CH_3, CN, CCH$ .

| Compound         | Natural charge of the central element |                  |            |
|------------------|---------------------------------------|------------------|------------|
|                  | Ground state                          | Transition state | Difference |
| <b>Aluminum</b>  |                                       |                  |            |
| $AlH_4^-$        | 0.57049                               | 0.96899          | 0.3985     |
| $AlF_4^-$        | 2.10855                               | 2.1281           | 0.01955    |
| $AlCl_4^-$       | 1.38572                               | 1.46609          | 0.08037    |
| $AlBr_4^-$       | 1.1422                                | 1.23628          | 0.09408    |
| $AlI_4^-$        | 0.74907                               | 0.86158          | 0.11251    |
| $Al(OH)_4^-$     | 1.99348                               | 2.00423          | 0.01075    |
| $Al(NH_2)_4^-$   | 1.82311                               | 1.88261          | 0.0595     |
| $Al(CH_3)_4^-$   | 1.58578                               | 1.80524          | 0.21946    |
| $Al(CN)_4^-$     | 1.18313                               | 1.39893          | 0.2158     |
| $Al(CCH)_4^-$    | 1.35394                               | 1.55337          | 0.19943    |
| <b>Gallium</b>   |                                       |                  |            |
| $GaH_4^-$        | 0.23335                               | 0.79667          | 0.56332    |
| $GaF_4^-$        | 2.04399                               | 2.04423          | 0.00024    |
| $GaCl_4^-$       | 1.27626                               | 1.33871          | 0.06245    |
| $GaBr_4^-$       | 0.98371                               | 1.06552          | 0.08181    |
| $GaI_4^-$        | 0.53686                               | 0.6577           | 0.12084    |
| $Ga(OH)_4^-$     | 1.9008                                | 1.91452          | 0.01372    |
| $Ga(NH_2)_4^-$   | 1.69451                               | 1.79243          | 0.09792    |
| $Ga(CH_3)_4^-$   | 1.39484                               | 1.65266          | 0.25782    |
| $Ga(CN)_4^-$     | 0.95944                               | 1.28117          | 0.32173    |
| $Ga(CCH)_4^-$    | 1.14169                               | 1.44644          | 0.30475    |
| <b>Silicon</b>   |                                       |                  |            |
| $SiH_4$          | 0.55975                               | 1.13747          | 0.57772    |
| $SiF_4$          | 2.53116                               | 2.52241          | -0.00875   |
| $SiCl_4$         | 1.29647                               | 1.34103          | 0.04456    |
| $SiBr_4$         | 0.92104                               | 0.97732          | 0.05628    |
| $SiI_4$          | 0.41609                               | 0.17381          | -0.24228   |
| $Si(OH)_4$       | 2.36362                               | 2.33136          | -0.03226   |
| $Si(NH_2)_4$     | 2.08901                               | 2.08797          | -0.00104   |
| $Si(CH_3)_4$     | 1.60607                               | 1.93719          | 0.33112    |
| $Si(CN)_4$       | 1.36167                               | 1.57971          | 0.21804    |
| $Si(CCH)_4$      | 1.50369                               | 1.68529          | 0.1816     |
| <b>Germanium</b> |                                       |                  |            |
| $GeH_4$          | 0.43832                               | 1.10654          | 0.66822    |
| $GeF_4$          | 2.56446                               | 2.55051          | -0.01395   |
| $GeCl_4$         | 1.39267                               | 1.41089          | 0.01822    |
| $GeBr_4$         | 0.96708                               | 1.00118          | 0.0341     |
| $GeI_4$          | 0.41058                               | 0.4718           | 0.06122    |
| $Ge(OH)_4$       | 2.3855                                | 2.36829          | -0.01721   |
| $Ge(NH_2)_4$     | 2.09243                               | 2.14433          | 0.0519     |
| $Ge(CH_3)_4$     | 1.61307                               | 1.90953          | 0.29646    |

|                                                |         |          |          |
|------------------------------------------------|---------|----------|----------|
| Ge(CN) <sub>4</sub>                            | 1.33518 | 1.61143  | 0.27625  |
| Ge(CCH) <sub>4</sub>                           | 1.49235 | 1.73036  | 0.23801  |
| <b>Phosphorus</b>                              |         |          |          |
| PF <sub>4</sub> <sup>+</sup>                   | 2.78457 | 2.70771  | -0.07686 |
| PCl <sub>4</sub> <sup>+</sup>                  | 1.13791 | 1.08996  | -0.04795 |
| PBr <sub>4</sub> <sup>+</sup>                  | 0.67458 | 0.62727  | -0.04731 |
| PI <sub>4</sub> <sup>+</sup>                   | 0.11388 | 0.07536  | -0.03852 |
| P(OH) <sub>4</sub> <sup>+</sup>                | 2.57103 | 2.44756  | -0.12347 |
| P(NH <sub>2</sub> ) <sub>4</sub> <sup>+</sup>  | 2.20486 | 2.09288  | -0.11198 |
| P(CH <sub>3</sub> ) <sub>4</sub> <sup>+</sup>  | 1.5881  | 1.93523  | 0.34713  |
| P(CN) <sub>4</sub> <sup>+</sup>                | 1.4611  | 1.49097  | 0.02987  |
| P(CCH) <sub>4</sub> <sup>+</sup>               | 1.59122 | 1.57401  | -0.01721 |
| <b>Arsenic</b>                                 |         |          |          |
| AsF <sub>4</sub> <sup>+</sup>                  | 2.88387 | 2.83098  | -0.05289 |
| AsCl <sub>4</sub> <sup>+</sup>                 | 1.37078 | 1.31534  | -0.05544 |
| AsBr <sub>4</sub> <sup>+</sup>                 | 0.87939 | 0.82546  | -0.05393 |
| AsI <sub>4</sub> <sup>+</sup>                  | 0.28951 | -0.00365 | -0.29316 |
| As(OH) <sub>4</sub> <sup>+</sup>               | 2.64632 | 2.56573  | -0.08059 |
| As(NH <sub>2</sub> ) <sub>4</sub> <sup>+</sup> | 2.26846 | 2.237    | -0.03146 |
| As(CH <sub>3</sub> ) <sub>4</sub> <sup>+</sup> | 1.64475 | 2.00717  | 0.36242  |
| As(CN) <sub>4</sub> <sup>+</sup>               | 1.55569 | 1.64065  | 0.08496  |
| As(CCH) <sub>4</sub> <sup>+</sup>              | 1.70869 | 1.73272  | 0.02403  |

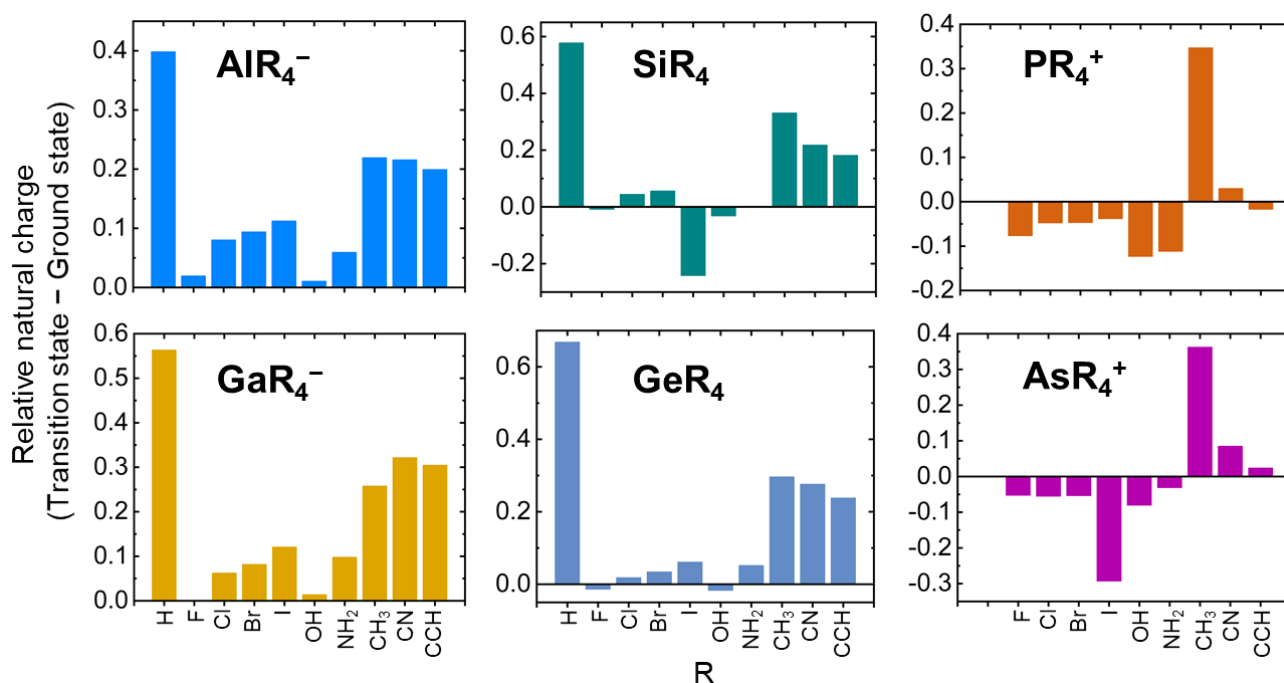

**Figure S28:** Relative natural charges (Transition state – Ground state) of the central element of  $ER_4^n$  with  $E^n = Al^-, Si, P^+, Ga^-, Ge, As^+$  and  $R = H, F, Cl, Br, I, OH, NH_2, CH_3, CN, CCH$ .

**Table S11:** Natural electron configuration of the central element of the ground and inversion transition state of  $ER_4^n$  with  $E^n = Al^-, Si, P^+, Ga^-, Ge, As^+$  and  $R = H, F, Cl, Br, I, OH, NH_2, CH_3, CN, CCH$ .

| Compound          | Natural electron configuration of the central element |          |          |                  |          |          |
|-------------------|-------------------------------------------------------|----------|----------|------------------|----------|----------|
|                   | Ground state                                          |          |          | Transition state |          |          |
| <b>Aluminum</b>   |                                                       |          |          |                  |          |          |
| $AlH_4^-$         | 3s 1.000                                              | 3p 1.904 | 3d 0.012 | 3s 1.000         | 3p 1.284 | 3d 0.023 |
| $AlF_4^-$         | 3s 1.000                                              | 3p 2.000 | 3d 0.143 | 3s 1.000         | 3p 1.893 | 3d 0.143 |
| $AlCl_4^-$        | 3s 1.000                                              | 3p 1.800 | 3d 0.091 | 3s 1.000         | 3p 1.636 | 3d 0.091 |
| $AlBr_4^-$        | 3s 1.000                                              | 3p 1.723 | 3d 0.077 | 3s 1.000         | 3p 1.569 | 3d 0.077 |
| $AlI_4^-$         | 3s 1.000                                              | 3p 1.688 | 3d 0.062 | 3s 1.000         | 3p 1.519 | 3d 0.074 |
| $Al(OH)_4^-$      | 3s 1.000                                              | 3p 1.939 | 4p 0.030 | 3s 1.000         | 3p 2.065 | 4p 0.032 |
| $Al(NH_2)_4^-$    | 3s 1.000                                              | 3p 1.850 | 3d 0.025 | 3s 1.000         | 3p 2.028 | 3d 0.028 |
| $Al(CH_3)_4^-$    | 3s 1.000                                              | 3p 1.593 | 3d 0.019 | 3s 1.000         | 3p 1.089 | 3d 0.018 |
| $Al(CN)_4^-$      | 3s 1.000                                              | 3p 1.857 | 4d 0.016 | 3s 1.000         | 3p 1.678 | 3d 0.017 |
| $Al(CCH)_4^-$     | 3s 1.000                                              | 3p 2.019 | 3d 0.019 | 3s 1.000         | 3p 1.860 | 3d 0.040 |
| <b>Gallium</b>    |                                                       |          |          |                  |          |          |
| $GaH_4^-$         | 4s 1.000                                              | 4p 1.936 | 4d 0.000 | 4s 1.000         | 4p 1.095 | 4d 0.000 |
| $GaF_4^-$         | 4s 1.000                                              | 4p 1.385 | 4d 0.026 | 4s 1.000         | 4p 1.114 | 4d 0.045 |
| $GaCl_4^-$        | 4s 1.000                                              | 4p 1.400 | 4d 0.029 | 4s 1.000         | 4p 1.176 | 4d 0.027 |
| $GaBr_4^-$        | 4s 1.000                                              | 4p 1.420 | 4d 0.025 | 4s 1.000         | 4p 1.186 | 4d 0.023 |
| $GaI_4^-$         | 4s 1.000                                              | 4p 1.474 | 4d 0.021 | 4s 1.000         | 4p 1.235 | 4d 0.020 |
| $Ga(OH)_4^-$      | 4s 1.000                                              | 4p 1.400 | 5p 0.022 | 4s 1.000         | 4p 1.208 | 5p 0.021 |
| $Ga(NH_2)_4^-$    | 4s 1.000                                              | 4p 1.415 | 4d 0.019 | 4s 1.000         | 4p 1.204 | 4d 0.019 |
| $Ga(CH_3)_4^-$    | 4s 1.000                                              | 4p 1.409 | 4d 0.015 | 4s 1.000         | 4p 0.773 | 4d 0.013 |
| $Ga(CN)_4^-$      | 4s 1.000                                              | 4p 1.833 | 4d 0.000 | 4s 1.000         | 4p 1.293 | 4d 0.000 |
| $Ga(CCH)_4^-$     | 4s 1.000                                              | 4p 1.937 | 4d 0.000 | 4s 1.000         | 4p 1.385 | 4d 0.000 |
| <b>Silicon</b>    |                                                       |          |          |                  |          |          |
| $SiH_4$           | 3s 1.000                                              | 3p 2.109 | 3d 0.018 | 3s 1.000         | 3p 1.398 | 3d 0.025 |
| $SiF_4$           | 3s 1.000                                              | 3p 2.045 | 3d 0.205 | 3s 1.000         | 3p 1.957 | 3d 0.196 |
| $SiCl_4$          | 3s 1.000                                              | 3p 2.012 | 3d 0.129 | 3s 1.000         | 3p 1.864 | 3d 0.125 |
| $SiBr_4$          | 3s 1.000                                              | 3p 1.920 | 3d 0.110 | 3s 1.000         | 3p 1.786 | 3d 0.107 |
| $SiI_4$           | 3s 1.000                                              | 3p 1.882 | 3d 0.092 | 3s 1.000         | 3p 0.877 | 4s 0.015 |
| $Si(OH)_4$        | 3s 1.000                                              | 3p 2.163 | 3d 0.143 | 3s 1.000         | 3p 2.224 | 3d 0.143 |
| $Si(NH_2)_4$      | 3s 1.000                                              | 3p 2.246 | 3d 0.070 | 3s 1.000         | 3p 2.577 | 3d 0.096 |
| $Si(CH_3)_4$      | 3s 1.000                                              | 3p 2.078 | 3d 0.026 | 3s 1.000         | 3p 1.446 | 3d 0.036 |
| $Si(CN)_4$        | 3s 1.000                                              | 3p 2.171 | 3d 0.037 | 3s 1.000         | 3p 2.000 | 3d 0.051 |
| $Si(CCH)_4$       | 3s 1.000                                              | 3p 2.356 | 3d 0.041 | 3s 1.000         | 3p 2.290 | 3d 0.058 |
| <b>Germanium</b>  |                                                       |          |          |                  |          |          |
| $GeH_4$           | 4s 1.000                                              | 4p 2.043 | 4d 0.009 | 4s 1.000         | 4p 1.223 | 4d 0.008 |
| $GeF_4$           | 4s 1.000                                              | 4p 1.421 | 4d 0.070 | 4s 1.000         | 4p 1.206 | 4d 0.063 |
| $GeCl_4$          | 4s 1.000                                              | 4p 1.571 | 4d 0.051 | 4s 1.000         | 4p 1.404 | 4d 0.048 |
| $GeBr_4$          | 4s 1.000                                              | 4p 1.625 | 4d 0.045 | 4s 1.000         | 4p 1.458 | 4d 0.042 |
| $GeI_4$           | 4s 1.000                                              | 4p 1.705 | 4d 0.039 | 4s 1.000         | 4p 1.548 | 4d 0.044 |
| $Ge(OH)_4$        | 4s 1.000                                              | 4p 1.508 | 5p 0.016 | 4s 1.000         | 4p 1.388 | 4d 0.030 |
| $Ge(NH_2)_4$      | 4s 1.000                                              | 4p 1.648 | 5p 0.014 | 4s 1.000         | 4p 1.614 | 5p 0.014 |
| $Ge(CH_3)_4$      | 4s 1.000                                              | 4p 1.663 | 4d 0.011 | 4s 1.000         | 4p 1.050 | 5p 0.010 |
| $Ge(CN)_4$        | 4s 1.000                                              | 4p 1.891 | 5d 0.011 | 4s 1.000         | 4p 1.505 | 4d 0.011 |
| $Ge(CCH)_4$       | 4s 1.000                                              | 4p 2.012 | 4d 0.012 | 4s 1.000         | 4p 1.690 | 5d 0.012 |
| <b>Phosphorus</b> |                                                       |          |          |                  |          |          |
| $PF_4^+$          | 3s 1.000                                              | 3p 2.108 | 3d 0.246 | 3s 1.000         | 3p 2.043 | 3d 0.217 |

|                                                |          |          |          |          |          |          |
|------------------------------------------------|----------|----------|----------|----------|----------|----------|
| PCl <sub>4</sub> <sup>+</sup>                  | 3s 1.000 | 3p 2.121 | 3d 0.172 | 3s 1.000 | 3p 2.058 | 3d 0.140 |
| PBr <sub>4</sub> <sup>+</sup>                  | 3s 1.000 | 3p 2.091 | 3d 0.144 | 3s 1.000 | 3p 2.029 | 3d 0.123 |
| PI <sub>4</sub> <sup>+</sup>                   | 3s 1.000 | 3p 2.134 | 3d 0.114 | 3s 1.000 | 3p 2.105 | 3d 0.098 |
| P(OH) <sub>4</sub> <sup>+</sup>                | 3s 1.000 | 3p 2.304 | 3d 0.174 | 3s 1.000 | 3p 2.347 | 3d 0.167 |
| P(NH <sub>2</sub> ) <sub>4</sub> <sup>+</sup>  | 3s 1.000 | 3p 2.405 | 3d 0.101 | 3s 1.000 | 3p 2.733 | 3d 0.120 |
| P(CH <sub>3</sub> ) <sub>4</sub> <sup>+</sup>  | 3s 1.000 | 3p 2.272 | 3d 0.029 | 3s 1.000 | 3p 1.712 | 3d 0.045 |
| P(CN) <sub>4</sub> <sup>+</sup>                | 3s 1.000 | 3p 2.337 | 3d 0.058 | 3s 1.000 | 3p 2.430 | 3d 0.070 |
| P(CCH) <sub>4</sub> <sup>+</sup>               | 3s 1.000 | 3p 2.505 | 3d 0.074 | 3s 1.000 | 3p 2.711 | 3d 0.078 |
| <b>Arsenic</b>                                 |          |          |          |          |          |          |
| AsF <sub>4</sub> <sup>+</sup>                  | 4s 1.000 | 4p 1.557 | 4d 0.089 | 4s 1.000 | 4p 1.407 | 4d 0.081 |
| AsCl <sub>4</sub> <sup>+</sup>                 | 4s 1.000 | 4p 1.815 | 4d 0.081 | 4s 1.000 | 4p 1.718 | 4d 0.069 |
| AsBr <sub>4</sub> <sup>+</sup>                 | 4s 1.000 | 4p 1.863 | 4d 0.072 | 4s 1.000 | 4p 1.793 | 4d 0.062 |
| AsI <sub>4</sub> <sup>+</sup>                  | 4s 1.000 | 4p 1.980 | 4d 0.065 | 4s 1.000 | 4p 1.452 | 5s 0.005 |
| As(OH) <sub>4</sub> <sup>+</sup>               | 4s 1.000 | 4p 1.747 | 4d 0.060 | 4s 1.000 | 4p 1.663 | 4d 0.056 |
| As(NH <sub>2</sub> ) <sub>4</sub> <sup>+</sup> | 4s 1.000 | 4p 1.924 | 4d 0.033 | 4s 1.000 | 4p 2.091 | 4d 0.034 |
| As(CH <sub>3</sub> ) <sub>4</sub> <sup>+</sup> | 4s 1.000 | 4p 1.956 | 4d 0.009 | 4s 1.000 | 4p 1.376 | 5p 0.008 |
| As(CN) <sub>4</sub> <sup>+</sup>               | 4s 1.000 | 4p 2.062 | 4d 0.018 | 4s 1.000 | 4p 1.947 | 4d 0.018 |
| As(CCH) <sub>4</sub> <sup>+</sup>              | 4s 1.000 | 4p 2.206 | 4d 0.020 | 4s 1.000 | 4p 2.198 | 4d 0.020 |

## S15. Energy decomposition analyses

Energy decomposition analyses (EDA) were carried out as described in Chapter S1 for the ground and inversion transition states of all ER<sub>4</sub><sup>n</sup> with E<sup>n</sup> = Al<sup>-</sup>, Si, P<sup>+</sup>, Ga<sup>-</sup>, Ge, As<sup>+</sup> and R = H, F, Cl, Br, I, OH, NH<sub>2</sub>, CH<sub>3</sub>, CN, CCH. For five compounds, (Si(NH<sub>2</sub>)<sub>4</sub>, Si(CH<sub>3</sub>)<sub>4</sub>, P(NH<sub>2</sub>)<sub>4</sub><sup>+</sup>, AsI<sub>4</sub><sup>+</sup>, and As(CH<sub>3</sub>)<sub>4</sub>), the calculation for the transition structure did not converge and non-aufbau populations were obtained. Therefore, results for those compounds are not shown. PH<sub>4</sub><sup>+</sup> and AsH<sub>4</sub><sup>+</sup> were not analyzed by the EDA due to the open-shell singlet configuration in their inversion transition states. As it is shown in Table S12, unreliably large electrostatic contributions were obtained for R = CCH. They were excluded from the data evaluation.

The following parameters were obtained from the EDA calculations: ΔE<sub>Pauli</sub> (total Pauli repulsion), ΔE<sub>Coul</sub> (electrostatic interaction), ΔE<sub>Orb</sub> (total orbital interaction), ΔE<sub>Disp</sub> (dispersion energy). They sum up to ΔE<sub>Int</sub> (total interaction energy).<sup>20</sup>

$$\Delta E_{Int}^i = \Delta E_{Pauli}^i + \Delta E_{Coul}^i + \Delta E_{Orb}^i + \Delta E_{Disp}^i, \quad (6)$$

with i = GS (ground state) or TS (transition state). Moreover, ΔE<sub>Prep</sub> (preparation energy) is defined as

$$\Delta E_{Prep}^i = E_{Region1}^i - E_{Region1}^{i,0} + E_{Region2}^i - E_{Region2}^{i,0}. \quad (7)$$

Given the chosen fragmentation scheme (Figure S29),

$$E_{Region1}^{GS} = E_{Region1}^{GS,0} = E_{Region1}^{TS} = E_{Region1}^{TS,0}, \quad (8)$$

and

$$E_{Region2}^{GS,0} = E_{Region2}^{TS,0}. \quad (9)$$

Therefore,

$$\Delta \Delta E_{Prep} = \Delta E_{Prep}^{TS} - \Delta E_{Prep}^{GS} = E_{Region2}^{TS} - E_{Region2}^{GS}. \quad (10)$$

The single point energies of region 2 for ground ( $E_{Region2}^{GS}$ ) and transition state ( $E_{Region2}^{TS}$ ) were also obtained from the EDA calculations. In total, the inversion barrier (IB) can then be derived from the EDA parameters,

$$IB = \Delta(\Delta E_{int} + \Delta E_{prep}) = \Delta E_{int}^{TS} - \Delta E_{int}^{GS} + \Delta \Delta E_{prep} \quad (11)$$

$$= \Delta \Delta E_{pauli} + \Delta \Delta E_{coul} + \Delta \Delta E_{orb} + \Delta \Delta E_{disp} + \Delta \Delta E_{prep}$$

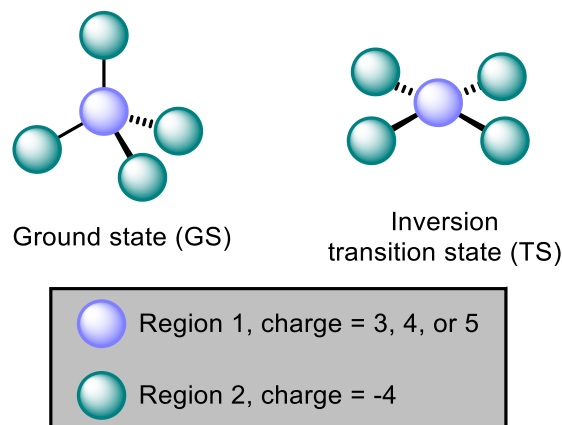

**Figure S29:** Heterolytic fragmentation scheme which was applied during the EDA analyses.

**Table S12:** Results of the energy decomposition analyses carried out for  $ER_4^n$  with  $E^n = Al^-, Si, P^+, Ga^-, Ge, As^+$  and  $R = H, F, Cl, Br, I, OH, NH_2, CH_3, CN, CCH$ . Calculations were done on the ZORA-BP86-D3(BJ)/TZ2P level of theory. The applied fragmentation scheme is shown in Figure S29.

|                                                   |          | $\Delta E_{Pauli}$<br>[kJ<br>mol <sup>-1</sup> ] | $\Delta E_{Coul}$<br>[kJ<br>mol <sup>-1</sup> ] | $\Delta E_{Orb}$<br>[kJ<br>mol <sup>-1</sup> ] | $\Delta E_{Disp}$<br>[kJ<br>mol <sup>-1</sup> ] | $\Delta E_{Int}$<br>[kJ<br>mol <sup>-1</sup> ] | $E_{Region1}$<br>[kJ<br>mol <sup>-1</sup> ] | $E_{Region2}$<br>[kJ<br>mol <sup>-1</sup> ] | Inver-<br>sion<br>barrier<br>[kJ<br>mol <sup>-1</sup> ] |
|---------------------------------------------------|----------|--------------------------------------------------|-------------------------------------------------|------------------------------------------------|-------------------------------------------------|------------------------------------------------|---------------------------------------------|---------------------------------------------|---------------------------------------------------------|
| <b>Aluminum</b>                                   |          |                                                  |                                                 |                                                |                                                 |                                                |                                             |                                             |                                                         |
| <b>AlH<sub>4</sub><sup>-</sup></b>                | GS       | 555.26                                           | -6781.73                                        | -2444.06                                       | -3.44                                           | -8673.97                                       | 5158.55                                     | 1814.31                                     |                                                         |
|                                                   | TS       | 497.63                                           | -6673.02                                        | -2329.28                                       | -3.63                                           | -8508.30                                       | 5158.55                                     | 1861.40                                     |                                                         |
|                                                   | $\Delta$ | -57.63                                           | 108.71                                          | 114.78                                         | -0.19                                           | 165.67                                         | 0.00                                        | 47.09                                       | 212.76                                                  |
| <b>AlF<sub>4</sub><sup>-</sup></b>                | GS       | 690.48                                           | -8118.49                                        | -1793.42                                       | -5.25                                           | -9226.68                                       | 5158.55                                     | 1176.25                                     |                                                         |
|                                                   | TS       | 598.54                                           | -7916.22                                        | -1799.93                                       | -5.30                                           | -9122.91                                       | 5158.55                                     | 1250.52                                     |                                                         |
|                                                   | $\Delta$ | -91.94                                           | 202.27                                          | -6.51                                          | -0.05                                           | 103.77                                         | 0.00                                        | 74.27                                       | 178.04                                                  |
| <b>AlCl<sub>4</sub><sup>-</sup></b>               | GS       | 522.09                                           | -6365.41                                        | -2069.00                                       | -19.04                                          | -7931.34                                       | 5158.55                                     | 675.15                                      |                                                         |
|                                                   | TS       | 438.68                                           | -6249.75                                        | -1996.26                                       | -19.04                                          | -7826.36                                       | 5158.55                                     | 739.34                                      |                                                         |
|                                                   | $\Delta$ | -83.41                                           | 115.66                                          | 72.74                                          | 0.00                                            | 104.98                                         | 0.00                                        | 64.19                                       | 169.17                                                  |
| <b>AlBr<sub>4</sub><sup>-</sup></b>               | GS       | 469.73                                           | -5515.90                                        | -2448.74                                       | -23.37                                          | -7518.28                                       | 5158.55                                     | 488.10                                      |                                                         |
|                                                   | TS       | 395.28                                           | -5453.07                                        | -2339.29                                       | -23.23                                          | -7420.29                                       | 5158.55                                     | 548.62                                      |                                                         |
|                                                   | $\Delta$ | -74.45                                           | 62.83                                           | 109.45                                         | 0.14                                            | 97.99                                          | 0.00                                        | 60.52                                       | 158.51                                                  |
| <b>AlI<sub>4</sub><sup>-</sup></b>                | GS       | 410.29                                           | -4733.43                                        | -2751.07                                       | -29.58                                          | -7103.78                                       | 5158.55                                     | 341.43                                      |                                                         |
|                                                   | TS       | 335.86                                           | -4702.27                                        | -2620.49                                       | -28.88                                          | -7015.74                                       | 5158.55                                     | 406.85                                      |                                                         |
|                                                   | $\Delta$ | -74.43                                           | 31.16                                           | 130.58                                         | 0.70                                            | 88.04                                          | 0.00                                        | 65.42                                       | 153.46                                                  |
| <b>Al(OH)<sub>4</sub><sup>-</sup></b>             | GS       | 686.95                                           | -7189.45                                        | -2517.90                                       | -11.30                                          | -9031.70                                       | 5158.55                                     | -1114.30                                    |                                                         |
|                                                   | TS       | 597.31                                           | -7067.83                                        | -2455.23                                       | -11.35                                          | -8937.10                                       | 5158.55                                     | -1101.21                                    |                                                         |
|                                                   | $\Delta$ | -89.64                                           | 121.62                                          | 62.67                                          | -0.05                                           | 94.60                                          | 0.00                                        | 13.09                                       | 107.69                                                  |
| <b>Al(NH<sub>2</sub>)<sub>4</sub><sup>-</sup></b> | GS       | 688.58                                           | -6693.26                                        | -2817.43                                       | -17.08                                          | -8839.19                                       | 5158.55                                     | -3049.52                                    |                                                         |
|                                                   | TS       | 598.85                                           | -6609.66                                        | -2766.11                                       | -17.03                                          | -8793.94                                       | 5158.55                                     | -2981.70                                    |                                                         |



|                                                   |          |         |           |          |        |           |         |          |        |
|---------------------------------------------------|----------|---------|-----------|----------|--------|-----------|---------|----------|--------|
|                                                   | $\Delta$ | -89.73  | 83.60     | 51.32    | 0.05   | 45.25     | 0.00    | 67.82    | 113.07 |
| <b>Al(CH<sub>3</sub>)<sub>4</sub><sup>-</sup></b> | GS       | 696.38  | -6168.76  | -3011.99 | -19.53 | -8503.90  | 5158.55 | -4818.24 |        |
|                                                   | TS       | 569.42  | -6002.76  | -2870.88 | -19.38 | -8323.61  | 5158.55 | -4792.92 |        |
|                                                   | $\Delta$ | -126.96 | 166.00    | 141.11   | 0.15   | 180.29    | 0.00    | 25.32    | 205.61 |
| <b>Al(CN)<sub>4</sub><sup>-</sup></b>             | GS       | 577.59  | -6174.99  | -2189.99 | -16.31 | -7803.70  | 5158.55 | -4458.15 |        |
|                                                   | TS       | 495.47  | -6079.18  | -2119.71 | -16.08 | -7719.49  | 5158.55 | -4379.04 |        |
|                                                   | $\Delta$ | -82.12  | 95.81     | 70.28    | 0.23   | 84.21     | 0.00    | 79.11    | 163.32 |
| <b>Al(CCH)<sub>4</sub><sup>-</sup></b>            | GS       | 614.13  | -6088.48  | -2689.78 | -17.78 | -8181.92  | 5158.55 | -5103.47 |        |
|                                                   | TS       | 550.16  | -5807.73  | -2758.96 | -17.40 | -8033.92  | 5158.55 | -5077.94 |        |
|                                                   | $\Delta$ | -63.97  | 280.75    | -69.18   | 0.38   | 148.00    | 0.00    | 25.53    | 173.53 |
| <b>Gallium</b>                                    |          |         |           |          |        |           |         |          |        |
| <b>GaH<sub>4</sub><sup>-</sup></b>                | GS       | 738.26  | -7037.85  | -2770.10 | -3.56  | -9073.25  | 5638.16 | 1825.19  |        |
|                                                   | TS       | 624.71  | -6882.89  | -2559.09 | -3.88  | -8821.14  | 5638.16 | 1839.51  |        |
|                                                   | $\Delta$ | -113.55 | 154.96    | 211.01   | -0.32  | 252.11    | 0.00    | 14.32    | 266.43 |
| <b>GaF<sub>4</sub><sup>-</sup></b>                | GS       | 799.17  | -8150.40  | -1813.11 | -5.63  | -9169.97  | 5638.16 | 1066.99  |        |
|                                                   | TS       | 707.86  | -7960.77  | -1854.69 | -5.67  | -9113.27  | 5638.16 | 1143.81  |        |
|                                                   | $\Delta$ | -91.31  | 189.63    | -41.58   | -0.04  | 56.70     | 0.00    | 76.82    | 133.52 |
| <b>GaCl<sub>4</sub><sup>-</sup></b>               | GS       | 650.41  | -6525.27  | -2243.83 | -19.29 | -8137.97  | 5638.16 | 640.49   |        |
|                                                   | TS       | 542.82  | -6374.73  | -2191.02 | -19.28 | -8042.19  | 5638.16 | 697.46   |        |
|                                                   | $\Delta$ | -107.59 | 150.54    | 52.81    | 0.01   | 95.78     | 0.00    | 56.97    | 152.75 |
| <b>GaBr<sub>4</sub><sup>-</sup></b>               | GS       | 587.47  | -5692.08  | -2657.01 | -23.42 | -7785.03  | 5638.16 | 469.30   |        |
|                                                   | TS       | 489.03  | -5593.32  | -2560.91 | -23.31 | -7688.49  | 5638.16 | 522.11   |        |
|                                                   | $\Delta$ | -98.44  | 98.76     | 96.10    | 0.11   | 96.54     | 0.00    | 52.81    | 149.35 |
| <b>GaI<sub>4</sub><sup>-</sup></b>                | GS       | 521.18  | -4902.64  | -3016.49 | -29.42 | -7427.38  | 5638.16 | 333.54   |        |
|                                                   | TS       | 416.73  | -4834.91  | -2889.14 | -28.77 | -7336.06  | 5638.16 | 390.78   |        |
|                                                   | $\Delta$ | -104.45 | 67.73     | 127.35   | 0.65   | 91.32     | 0.00    | 57.24    | 148.56 |
| <b>Ga(OH)<sub>4</sub><sup>-</sup></b>             | GS       | 798.20  | -7350.60  | -2519.58 | -11.84 | -9083.82  | 5638.16 | -1199.54 |        |
|                                                   | TS       | 707.23  | -7203.14  | -2511.03 | -11.87 | -9018.81  | 5638.16 | -1178.91 |        |
|                                                   | $\Delta$ | -90.97  | 147.46    | 8.55     | -0.03  | 65.01     | 0.00    | 20.63    | 85.64  |
| <b>Ga(NH<sub>2</sub>)<sub>4</sub><sup>-</sup></b> | GS       | 818.86  | -6845.15  | -2936.00 | -17.81 | -8980.10  | 5638.16 | -3130.24 |        |
|                                                   | TS       | 700.69  | -6696.46  | -2885.14 | -17.74 | -8898.65  | 5638.16 | -3089.21 |        |
|                                                   | $\Delta$ | -118.17 | 148.69    | 50.86    | 0.07   | 81.45     | 0.00    | 41.03    | 122.48 |
| <b>Ga(CH<sub>3</sub>)<sub>4</sub><sup>-</sup></b> | GS       | 896.20  | -6453.72  | -3252.68 | -20.34 | -8830.55  | 5638.16 | -4829.55 |        |
|                                                   | TS       | 684.33  | -6200.89  | -3067.38 | -20.22 | -8604.19  | 5638.16 | -4820.28 |        |
|                                                   | $\Delta$ | -211.87 | 252.83    | 185.30   | 0.12   | 226.36    | 0.00    | 9.27     | 235.63 |
| <b>Ga(CN)<sub>4</sub><sup>-</sup></b>             | GS       | 768.68  | -6412.60  | -2435.39 | -16.95 | -8096.27  | 5638.16 | -4462.22 |        |
|                                                   | TS       | 606.60  | -6215.44  | -2308.00 | -16.78 | -7933.61  | 5638.16 | -4413.41 |        |
|                                                   | $\Delta$ | -162.08 | 197.16    | 127.39   | 0.17   | 162.66    | 0.00    | 48.81    | 211.47 |
| <b>Ga(CCH)<sub>4</sub><sup>-</sup></b>            | GS       | 813.29  | -6344.75  | -2923.43 | -18.50 | -8473.40  | 5638.16 | -5105.79 |        |
|                                                   | TS       | 664.40  | -6032.89  | -2875.02 | -18.13 | -8261.61  | 5638.16 | -5097.19 |        |
|                                                   | $\Delta$ | -148.89 | 311.86    | 48.41    | 0.37   | 211.79    | 0.00    | 8.60     | 220.39 |
| <b>Silicon</b>                                    |          |         |           |          |        |           |         |          |        |
| <b>SiH<sub>4</sub></b>                            | GS       | 737.97  | -8921.33  | -5485.41 | -3.61  | -13672.37 | 9928.32 | 1932.24  |        |
|                                                   | TS       | 657.67  | -8848.80  | -5176.02 | -3.82  | -13370.97 | 9928.32 | 1997.17  |        |
|                                                   | $\Delta$ | -80.30  | 72.53     | 309.39   | -0.21  | 301.40    | 0.00    | 64.93    | 366.33 |
| <b>SiF<sub>4</sub></b>                            | GS       | 1016.43 | -11001.48 | -4003.78 | -5.81  | -13994.64 | 9928.32 | 1338.11  |        |
|                                                   | TS       | 864.90  | -10698.48 | -3989.83 | -5.86  | -13829.27 | 9928.32 | 1424.79  |        |
|                                                   | $\Delta$ | -151.53 | 303.00    | 13.95    | -0.05  | 165.37    | 0.00    | 86.68    | 252.05 |
| <b>SiCl<sub>4</sub></b>                           | GS       | 719.39  | -8537.27  | -4686.71 | -21.11 | -12525.70 | 9928.32 | 784.71   |        |
|                                                   | TS       | 586.58  | -8397.88  | -4530.00 | -21.19 | -12362.47 | 9928.32 | 865.94   |        |

|                                       |          |         |           |          |        |           |          |          |        |
|---------------------------------------|----------|---------|-----------|----------|--------|-----------|----------|----------|--------|
|                                       | $\Delta$ | -132.81 | 139.39    | 156.71   | -0.08  | 163.23    | 0.00     | 81.23    | 244.46 |
| <b>SiBr<sub>4</sub></b>               | GS       | 617.57  | -7321.35  | -5329.08 | -26.11 | -12058.98 | 9928.32  | 560.43   |        |
|                                       | TS       | 505.83  | -7264.07  | -5126.32 | -25.79 | -11910.31 | 9928.32  | 639.47   |        |
|                                       | $\Delta$ | -111.74 | 57.28     | 202.76   | 0.32   | 148.67    | 0.00     | 79.04    | 227.71 |
| <b>SiI<sub>4</sub></b>                | GS       | 513.30  | -6249.31  | -5852.73 | -33.01 | -11621.75 | 9928.32  | 391.72   |        |
|                                       | TS       | 410.62  | -6228.53  | -5639.55 | -32.46 | -11489.86 | 9928.32  | 475.17   |        |
|                                       | $\Delta$ | -102.68 | 20.78     | 213.18   | 0.55   | 131.89    | 0.00     | 83.45    | 215.34 |
| <b>Si(OH)<sub>4</sub></b>             | GS       | 1010.12 | -9574.06  | -5361.82 | -12.29 | -13938.05 | 9928.32  | -984.62  |        |
|                                       | TS       | 852.50  | -9419.05  | -5201.05 | -12.37 | -13779.98 | 9928.32  | -967.50  |        |
|                                       | $\Delta$ | -157.62 | 155.01    | 160.77   | -0.08  | 158.07    | 0.00     | 17.12    | 175.19 |
| <b>Si(CN)<sub>4</sub></b>             | GS       | 840.08  | -8364.03  | -4820.80 | -17.75 | -12362.51 | 9928.32  | -4350.18 |        |
|                                       | TS       | 727.85  | -8251.69  | -4686.32 | -17.65 | -12227.80 | 9928.32  | -4238.69 |        |
|                                       | $\Delta$ | -112.23 | 112.34    | 134.48   | 0.10   | 134.71    | 0.00     | 111.49   | 246.20 |
| <b>Si(CCH)<sub>4</sub></b>            | GS       | 919.33  | -8090.11  | -5814.85 | -19.49 | -13005.13 | 9928.32  | -4983.46 |        |
|                                       | TS       | 828.34  | -7483.12  | -6050.21 | -19.24 | -12724.21 | 9928.32  | -5009.98 |        |
|                                       | $\Delta$ | -90.99  | 606.99    | -235.36  | 0.25   | 280.92    | 0.00     | -26.52   | 254.40 |
| <b>Germanium</b>                      |          |         |           |          |        |           |          |          |        |
| <b>GeH<sub>4</sub></b>                | GS       | 933.48  | -9213.81  | -5373.76 | -3.87  | -13657.95 | 10079.28 | 1897.21  |        |
|                                       | TS       | 790.16  | -9080.72  | -4990.84 | -4.16  | -13285.54 | 10079.28 | 1926.55  |        |
|                                       | $\Delta$ | -143.32 | 133.09    | 382.92   | -0.29  | 372.41    | 0.00     | 29.34    | 401.75 |
| <b>GeF<sub>4</sub></b>                | GS       | 1074.33 | -11025.27 | -3548.68 | -6.22  | -13505.85 | 10079.28 | 1179.54  |        |
|                                       | TS       | 941.00  | -10743.14 | -3607.47 | -6.28  | -13415.89 | 10079.28 | 1261.31  |        |
|                                       | $\Delta$ | -133.33 | 282.13    | -58.79   | -0.06  | 89.96     | 0.00     | 81.77    | 171.73 |
| <b>GeCl<sub>4</sub></b>               | GS       | 827.88  | -8689.39  | -4481.38 | -21.40 | -12364.27 | 10079.28 | 706.21   |        |
|                                       | TS       | 685.00  | -8505.58  | -4391.09 | -21.41 | -12233.06 | 10079.28 | 773.19   |        |
|                                       | $\Delta$ | -142.88 | 183.81    | 90.29    | -0.01  | 131.21    | 0.00     | 66.98    | 198.19 |
| <b>GeBr<sub>4</sub></b>               | GS       | 718.66  | -7509.10  | -5165.61 | -26.10 | -11982.15 | 10079.28 | 509.20   |        |
|                                       | TS       | 595.34  | -7404.31  | -5018.17 | -25.92 | -11853.02 | 10079.28 | 572.99   |        |
|                                       | $\Delta$ | -123.32 | 104.79    | 147.44   | 0.18   | 129.13    | 0.00     | 63.79    | 192.92 |
| <b>GeI<sub>4</sub></b>                | GS       | 610.26  | -6432.21  | -5760.76 | -32.84 | -11615.56 | 10079.28 | 357.75   |        |
|                                       | TS       | 490.02  | -6369.69  | -5582.67 | -32.13 | -11494.42 | 10079.28 | 426.06   |        |
|                                       | $\Delta$ | -120.24 | 62.52     | 178.09   | 0.71   | 121.14    | 0.00     | 68.31    | 189.45 |
| <b>Ge(OH)<sub>4</sub></b>             | GS       | 1072.81 | -9802.20  | -4823.05 | -12.96 | -13565.40 | 10079.28 | -1097.24 |        |
|                                       | TS       | 936.87  | -9599.68  | -4783.03 | -13.01 | -13458.86 | 10079.28 | -1083.19 |        |
|                                       | $\Delta$ | -135.94 | 202.52    | 40.02    | -0.05  | 106.54    | 0.00     | 14.05    | 120.59 |
| <b>Ge(NH<sub>2</sub>)<sub>4</sub></b> | GS       | 1102.04 | -9169.08  | -5481.43 | -19.41 | -13567.87 | 10079.28 | -3020.00 |        |
|                                       | TS       | 961.08  | -9052.14  | -5369.98 | -19.38 | -13480.40 | 10079.28 | -2940.02 |        |
|                                       | $\Delta$ | -140.96 | 116.94    | 111.45   | 0.03   | 87.47     | 0.00     | 79.98    | 167.45 |
| <b>Ge(CH<sub>3</sub>)<sub>4</sub></b> | GS       | 1140.55 | -8460.14  | -6073.25 | -22.27 | -13415.12 | 10079.28 | -4789.56 |        |
|                                       | TS       | 874.85  | -8179.02  | -5757.07 | -22.29 | -13083.55 | 10079.28 | -4769.43 |        |
|                                       | $\Delta$ | -265.70 | 281.12    | 316.18   | -0.02  | 331.57    | 0.00     | 20.13    | 351.70 |
| <b>Ge(CN)<sub>4</sub></b>             | GS       | 985.63  | -8547.00  | -4660.55 | -18.80 | -12240.71 | 10079.28 | -4401.84 |        |
|                                       | TS       | 811.93  | -8347.23  | -4488.84 | -18.66 | -12042.79 | 10079.28 | -4332.41 |        |
|                                       | $\Delta$ | -173.70 | 199.77    | 171.71   | 0.14   | 197.92    | 0.00     | 69.43    | 267.35 |
| <b>Ge(CCH)<sub>4</sub></b>            | GS       | 1077.33 | -8384.16  | -5548.54 | -20.60 | -12875.96 | 10079.28 | -5027.74 |        |
|                                       | TS       | 913.81  | -7875.80  | -5606.15 | -20.27 | -12588.38 | 10079.28 | -5038.43 |        |
|                                       | $\Delta$ | -163.52 | 508.36    | -57.61   | 0.33   | 287.58    | 0.00     | -10.69   | 276.89 |
| <b>Phosphorus</b>                     |          |         |           |          |        |           |          |          |        |
| <b>PF<sub>4</sub><sup>+</sup></b>     | GS       | 1268.64 | -13747.06 | -7421.37 | -6.39  | -19906.18 | 16955.80 | 1448.90  |        |
|                                       | TS       | 1047.47 | -13356.33 | -7363.56 | -6.44  | -19678.86 | 16955.80 | 1541.91  |        |

|                                                   |          |         |           |           |        |           |          |          |        |
|---------------------------------------------------|----------|---------|-----------|-----------|--------|-----------|----------|----------|--------|
|                                                   | $\Delta$ | -221.17 | 390.73    | 57.81     | -0.05  | 227.32    | 0.00     | 93.01    | 320.33 |
| <b>PCl<sub>4</sub><sup>+</sup></b>                | GS       | 850.72  | -10635.28 | -8757.21  | -23.17 | -18564.95 | 16955.80 | 859.06   |        |
|                                                   | TS       | 666.79  | -10488.13 | -8511.71  | -23.35 | -18356.37 | 16955.80 | 946.54   |        |
|                                                   | $\Delta$ | -183.93 | 147.15    | 245.50    | -0.18  | 208.58    | 0.00     | 87.48    | 296.06 |
| <b>PBr<sub>4</sub><sup>+</sup></b>                | GS       | 699.13  | -9085.28  | -9715.33  | -28.75 | -18130.22 | 16955.80 | 605.35   |        |
|                                                   | TS       | 551.48  | -9042.45  | -9428.82  | -28.39 | -17948.13 | 16955.80 | 689.44   |        |
|                                                   | $\Delta$ | -147.65 | 42.83     | 286.51    | 0.36   | 182.09    | 0.00     | 84.09    | 266.18 |
| <b>PI<sub>4</sub><sup>+</sup></b>                 | GS       | 556.32  | -7747.01  | -10539.51 | -36.41 | -17766.61 | 16955.80 | 419.23   |        |
|                                                   | TS       | 432.58  | -7741.42  | -10266.25 | -36.03 | -17611.05 | 16955.80 | 507.96   |        |
|                                                   | $\Delta$ | -123.74 | 5.59      | 273.26    | 0.38   | 155.56    | 0.00     | 88.73    | 244.29 |
| <b>P(OH)<sub>4</sub><sup>+</sup></b>              | GS       | 1277.78 | -11810.65 | -9582.46  | -13.33 | -20128.67 | 16955.80 | -904.01  |        |
|                                                   | TS       | 1032.77 | -11646.39 | -9285.71  | -13.41 | -19912.75 | 16955.80 | -879.58  |        |
|                                                   | $\Delta$ | -245.01 | 164.26    | 296.75    | -0.08  | 215.92    | 0.00     | 24.43    | 240.35 |
| <b>P(CH<sub>3</sub>)<sub>4</sub><sup>+</sup></b>  | GS       | 1143.26 | -9972.01  | -11075.44 | -22.72 | -19926.92 | 16955.80 | -4725.64 |        |
|                                                   | TS       | 956.79  | -9608.87  | -10758.57 | -22.90 | -19433.56 | 16955.80 | -4706.53 |        |
|                                                   | $\Delta$ | -186.47 | 363.14    | 316.87    | -0.18  | 493.36    | 0.00     | 19.11    | 512.47 |
| <b>P(CN)<sub>4</sub><sup>+</sup></b>              | GS       | 1045.56 | -10458.03 | -8910.00  | -19.45 | -18341.92 | 16955.80 | -4280.75 |        |
|                                                   | TS       | 908.50  | -10314.00 | -8767.30  | -19.40 | -18192.17 | 16955.80 | -4143.89 |        |
|                                                   | $\Delta$ | -137.06 | 144.03    | 142.70    | 0.05   | 149.75    | 0.00     | 136.86   | 286.61 |
| <b>P(CCH)<sub>4</sub><sup>+</sup></b>             | GS       | 1185.19 | -9922.87  | -10540.52 | -21.39 | -19299.59 | 16955.80 | -4910.29 |        |
|                                                   | TS       | 1057.13 | -8982.70  | -10966.58 | -21.21 | -18913.34 | 16955.80 | -4999.65 |        |
|                                                   | $\Delta$ | -128.06 | 940.17    | -426.06   | 0.18   | 386.25    | 0.00     | -89.36   | 296.89 |
| <b>Arsenic</b>                                    |          |         |           |           |        |           |          |          |        |
| <b>AsF<sub>4</sub><sup>+</sup></b>                | GS       | 1278.67 | -13837.95 | -6094.07  | -7.36  | -18660.71 | 16343.67 | 1252.72  |        |
|                                                   | TS       | 1107.39 | -13465.01 | -6179.29  | -7.41  | -18544.32 | 16343.67 | 1337.96  |        |
|                                                   | $\Delta$ | -171.28 | 372.94    | -85.22    | -0.05  | 116.39    | 0.00     | 85.24    | 201.63 |
| <b>AsCl<sub>4</sub><sup>+</sup></b>               | GS       | 953.10  | -10816.87 | -7777.12  | -25.37 | -17666.25 | 16343.67 | 748.67   |        |
|                                                   | TS       | 777.28  | -10603.32 | -7659.63  | -25.40 | -17511.03 | 16343.67 | 820.72   |        |
|                                                   | $\Delta$ | -175.82 | 213.55    | 117.49    | -0.03  | 155.22    | 0.00     | 72.05    | 227.27 |
| <b>AsBr<sub>4</sub><sup>+</sup></b>               | GS       | 802.60  | -9303.40  | -8791.99  | -31.03 | -17323.82 | 16343.67 | 533.18   |        |
|                                                   | TS       | 659.23  | -9194.59  | -8611.11  | -30.76 | -17177.19 | 16343.67 | 602.79   |        |
|                                                   | $\Delta$ | -143.37 | 108.81    | 180.88    | 0.27   | 146.63    | 0.00     | 69.61    | 216.24 |
| <b>As(OH)<sub>4</sub><sup>+</sup></b>             | GS       | 1297.06 | -12182.94 | -8078.13  | -15.26 | -18979.28 | 16343.67 | -1036.82 |        |
|                                                   | TS       | 1103.79 | -11923.62 | -8010.81  | -15.32 | -18845.97 | 16343.67 | -1023.91 |        |
|                                                   | $\Delta$ | -193.27 | 259.32    | 67.32     | -0.06  | 133.31    | 0.00     | 12.91    | 146.22 |
| <b>As(NH<sub>2</sub>)<sub>4</sub><sup>+</sup></b> | GS       | 1329.43 | -11415.89 | -9059.84  | -22.93 | -19169.22 | 16343.67 | -2951.44 |        |
|                                                   | TS       | 1196.32 | -11494.99 | -8796.70  | -22.91 | -19118.25 | 16343.67 | -2810.39 |        |
|                                                   | $\Delta$ | -133.11 | -79.10    | 263.14    | 0.02   | 50.97     | 0.00     | 141.05   | 192.02 |
| <b>As(CN)<sub>4</sub><sup>+</sup></b>             | GS       | 1159.76 | -10642.69 | -7928.60  | -22.96 | -17434.50 | 16343.67 | -4366.44 |        |
|                                                   | TS       | 979.33  | -10428.35 | -7764.37  | -22.80 | -17236.16 | 16343.67 | -4282.84 |        |
|                                                   | $\Delta$ | -180.43 | 214.34    | 164.23    | 0.16   | 198.34    | 0.00     | 83.60    | 281.94 |
| <b>As(CCH)<sub>4</sub><sup>+</sup></b>            | GS       | 1320.63 | -10357.97 | -9312.34  | -25.27 | -18374.95 | 16343.67 | -4977.70 |        |
|                                                   | TS       | 1136.90 | -9610.58  | -9546.14  | -24.93 | -18044.73 | 16343.67 | -5016.47 |        |
|                                                   | $\Delta$ | -183.73 | 747.39    | -233.80   | 0.34   | 330.22    | 0.00     | -38.77   | 291.45 |

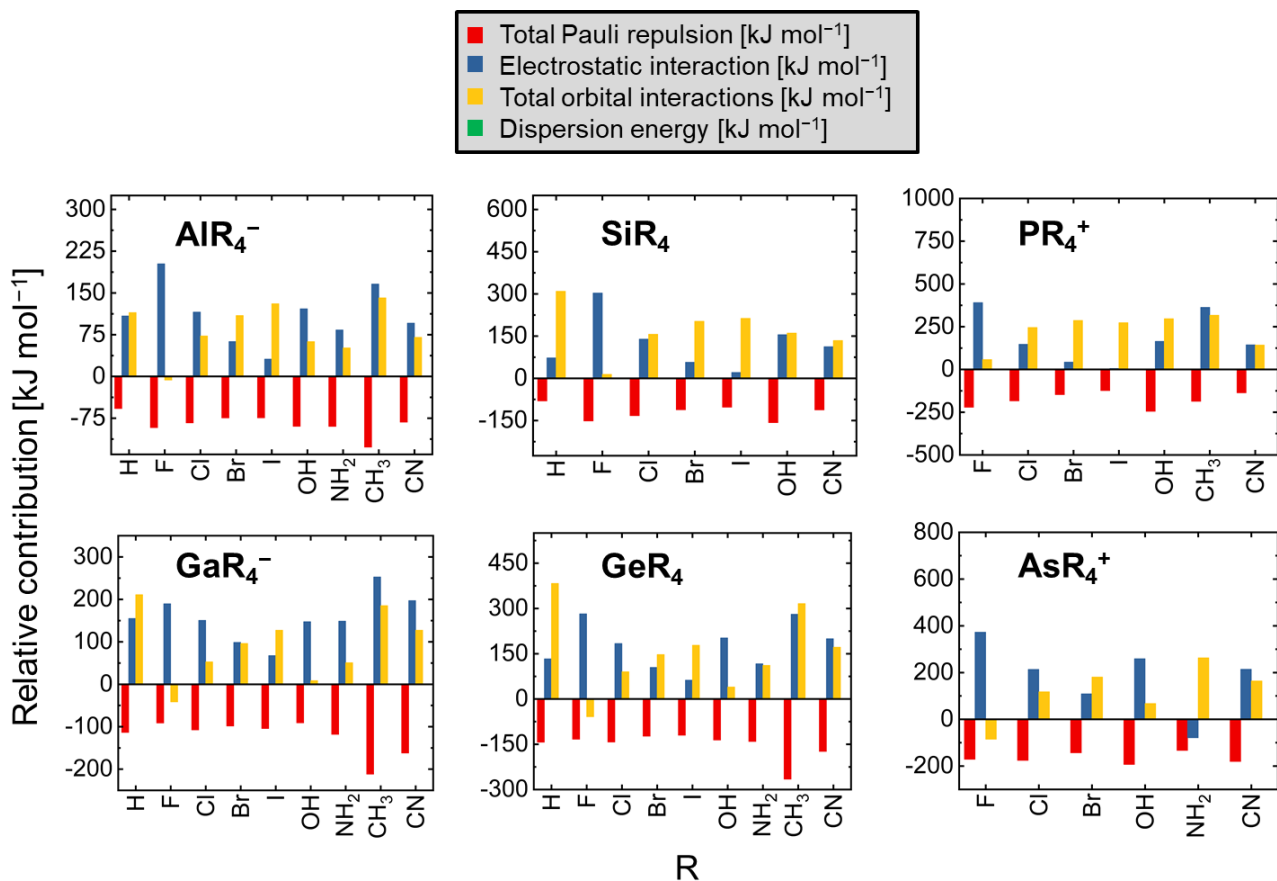

**Figure S30:** Visualization of the differences (transition state – ground state) of the individual components of the interaction energy between region 1 and region 2 (see Figure S29) as obtained by the energy decomposition analyses (Table S12). The contributions of the dispersion energy are too small to be visible in the plots.

### Influence of the dissection strategy of the inversion barrier into a radial and an angular contribution

The dissection of the inversion barrier into a radial and an angular portion can be carried out in two different ways when going from the tetrahedral ground to the inversion transition state:

- 1<sup>st</sup> option: 1) planarization of the system with frozen bond lengths (TS', see Table 2 in the main article) → **angular part 1**, 2) bond length relaxation → **radial part 1**
- 2<sup>nd</sup> option: 1) change of the bond lengths toward those of the transition state (GS' in Table S13) → **radial part 2**, 2) planarization of the system → **angular part 2**

We chose the first option and show that both possibilities result in identical conclusions (compare columns six/seven and eight/nine in Table S13). Of note, in all cases of the class of  $ER_4^n$  compounds a bond elongation occurs when going from the ground to the inversion transition state (see Chapter S4).

**Table S13:** Results of the energy decomposition analyses (BP86-D3(BJ)/QZ4P) of the ground state (GS), the transition state (TS), a square-planar structure with the bond lengths of the ground state (TS', see Table 2 in the main article), and a tetrahedral structure with the bond lengths of the transition state (GS') of  $SiH_4$  and  $SiF_4$ . All numbers are given in  $kJ\ mol^{-1}$ .

|                    | GS               | TS'              | GS'              | TS               | Angular<br>1<br>(TS' – GS) | Angular<br>2<br>(TS – GS') | Radial<br>1<br>(TS – TS') | Radial<br>2<br>(GS' – GS) | Total<br>(TS – GS) |
|--------------------|------------------|------------------|------------------|------------------|----------------------------|----------------------------|---------------------------|---------------------------|--------------------|
| $\Delta E_{Pauli}$ | 692.03           | 709.54           | 564.28           | 582.43           | 17.51                      | 18.15                      | -127.11                   | -127.75                   | -109.60            |
| $\Delta E_{Coul}$  | -7847.32         | -7807.01         | -7831.31         | -7795.30         | 40.31                      | 36.01                      | 11.71                     | 16.01                     | 52.02              |
| $\Delta E_{Orb}$   | -6241.34         | -6018.76         | -6079.89         | -5872.73         | 222.58                     | 207.16                     | 146.03                    | 161.45                    | 368.61             |
| $\Delta E_{Disp}$  | -3.61            | -3.68            | -3.75            | -3.82            | -0.07                      | -0.07                      | -0.14                     | -0.14                     | -0.21              |
| $\Delta E_{Int}$   | <b>-13400.24</b> | <b>-13119.91</b> | <b>-13350.67</b> | <b>-13089.42</b> | <b>280.33</b>              | <b>261.25</b>              | <b>30.49</b>              | <b>49.57</b>              | <b>310.82</b>      |
| $E_{Region2}$      | 1658.76          | 1756.17          | 1619.11          | 1712.90          |                            |                            |                           |                           |                    |

|                                                          |                  |                  |                  |                  |               |               |              |              |               |
|----------------------------------------------------------|------------------|------------------|------------------|------------------|---------------|---------------|--------------|--------------|---------------|
| $\Delta\Delta E_{\text{Prep}}$                           |                  |                  |                  |                  | 97.41         | 93.79         | -43.27       | -39.65       | 54.14         |
| $\Delta(\Delta E_{\text{Int}} + \Delta E_{\text{Prep}})$ |                  |                  |                  |                  | 377.74        | 355.04        | -12.78       | 9.92         | 364.96        |
| $\Delta E_{\text{Pauli}}$                                | 957.79           | 961.89           | 824.20           | 831.47           | 4.10          | 7.27          | -130.42      | -133.59      | -126.32       |
| $\Delta E_{\text{Coul}}$                                 | -10558.30        | -10406.27        | -10503.38        | -10370.15        | 152.03        | 133.23        | 36.12        | 54.92        | 188.15        |
| $\Delta E_{\text{Orb}}$                                  | -4277.92         | -4317.10         | -4146.57         | -4182.45         | -39.18        | -35.88        | 134.65       | 131.35       | 95.47         |
| $\Delta E_{\text{Disp}}$                                 | -5.81            | -5.84            | -5.82            | -5.86            | -0.03         | -0.04         | -0.02        | -0.01        | -0.05         |
| $\Delta E_{\text{Int}}$                                  | <b>-13884.24</b> | <b>-13767.32</b> | <b>-13831.57</b> | <b>-13726.99</b> | <b>116.92</b> | <b>104.58</b> | <b>40.33</b> | <b>52.67</b> | <b>157.25</b> |
| $E_{\text{Region2}}$                                     | 1219.45          | 1374.23          | 1170.16          | 1314.75          |               |               |              |              |               |
| $\Delta\Delta E_{\text{Prep}}$                           |                  |                  |                  |                  | 154.78        | 144.59        | -59.48       | -49.29       | 95.30         |
| $\Delta(\Delta E_{\text{Int}} + \Delta E_{\text{Prep}})$ |                  |                  |                  |                  | 271.70        | 249.17        | -19.15       | 3.38         | 252.55        |

### Homolytic versus heterolytic fragmentation

In addition to the heterolytic fragmentation scheme shown in Figure S29, the corresponding homolytic version was probed for  $\text{SiH}_4$  and  $\text{SiF}_4$ . This was done also with respect to the dissection into a radial and an angular portion (see Table 2 in the main article).

**Table S14:** Results of the energy decomposition analyses (BP86-D3(BJ)/QZ4P) of the ground state (GS) and the inversion transition state (TS) of  $\text{SiH}_4$  and  $\text{SiF}_4$  with respect to homolytic or heterolytic fragmentation. Individual angular and radial contributions were derived with help of a  $D_{4h}$  symmetric structure with the bond lengths of the ground state (TS', see Table 2 in the main article). All numbers are given in  $\text{kJ mol}^{-1}$ .

|                                                          | GS               | TS'              | TS               | Angular contribution (TS' – GS) | Radial contribution (TS – TS') | Total (TS – GS) |
|----------------------------------------------------------|------------------|------------------|------------------|---------------------------------|--------------------------------|-----------------|
| <b>SiH<sub>4</sub>, homolytic fragmentation</b>          |                  |                  |                  |                                 |                                |                 |
| $\Delta E_{\text{Pauli}}$                                | 122.35           | 102.66           | 37.15            | -19.69                          | -65.51                         | -85.20          |
| $\Delta E_{\text{Coul}}$                                 | -638.12          | -592.56          | -554.55          | 45.56                           | 38.01                          | 83.57           |
| $\Delta E_{\text{Orb}}$                                  | -1300.71         | -988.06          | -956.93          | 312.65                          | 31.13                          | 343.78          |
| $\Delta E_{\text{Disp}}$                                 | -3.61            | -3.68            | -3.82            | -0.07                           | -0.14                          | -0.21           |
| $\Delta E_{\text{Int}}$                                  | <b>-1820.09</b>  | <b>-1481.64</b>  | <b>-1478.15</b>  | <b>338.45</b>                   | <b>3.49</b>                    | <b>341.94</b>   |
| $E_{\text{Region2}}$                                     | -328.29          | -288.98          | -305.26          |                                 |                                |                 |
| $\Delta\Delta E_{\text{Prep}}$                           |                  |                  |                  | 39.31                           | -16.28                         | 23.03           |
| $\Delta(\Delta E_{\text{Int}} + \Delta E_{\text{Prep}})$ |                  |                  |                  | <b>377.76</b>                   | <b>-12.79</b>                  | <b>364.97</b>   |
| <b>SiH<sub>4</sub>, heterolytic fragmentation</b>        |                  |                  |                  |                                 |                                |                 |
| $\Delta E_{\text{Pauli}}$                                | 692.03           | 709.54           | 582.43           | 17.51                           | -127.11                        | -109.60         |
| $\Delta E_{\text{Coul}}$                                 | -7847.32         | -7807.01         | -7795.30         | 40.31                           | 11.71                          | 52.02           |
| $\Delta E_{\text{Orb}}$                                  | -6241.34         | -6018.76         | -5872.73         | 222.58                          | 146.03                         | 368.61          |
| $\Delta E_{\text{Disp}}$                                 | -3.61            | -3.68            | -3.82            | -0.07                           | -0.14                          | -0.21           |
| $\Delta E_{\text{Int}}$                                  | <b>-13400.24</b> | <b>-13119.91</b> | <b>-13089.42</b> | <b>280.33</b>                   | <b>30.49</b>                   | <b>310.82</b>   |
| $E_{\text{Region2}}$                                     | 1658.76          | 1756.17          | 1712.90          |                                 |                                |                 |
| $\Delta\Delta E_{\text{Prep}}$                           |                  |                  |                  | 97.41                           | -43.27                         | 54.14           |
| $\Delta(\Delta E_{\text{Int}} + \Delta E_{\text{Prep}})$ |                  |                  |                  | <b>377.74</b>                   | <b>-12.78</b>                  | <b>364.96</b>   |
| <b>SiF<sub>4</sub>, homolytic fragmentation</b>          |                  |                  |                  |                                 |                                |                 |
| $\Delta E_{\text{Pauli}}$                                | 5994.37          | 6235.27          | 5675.81          | 240.90                          | -559.46                        | -318.56         |
| $\Delta E_{\text{Coul}}$                                 | -2385.54         | -2453.42         | -2261.10         | -67.88                          | 192.32                         | 124.44          |
| $\Delta E_{\text{Orb}}$                                  | -6334.46         | -6121.83         | -5790.75         | 212.63                          | 331.08                         | 543.71          |
| $\Delta E_{\text{Disp}}$                                 | -5.81            | -5.84            | -5.86            | -0.03                           | -0.02                          | -0.05           |
| $\Delta E_{\text{Int}}$                                  | <b>-2731.44</b>  | <b>-2345.82</b>  | <b>-2381.90</b>  | <b>385.62</b>                   | <b>-36.08</b>                  | <b>349.54</b>   |

|                                                          |                  |                  |                  |               |               |               |
|----------------------------------------------------------|------------------|------------------|------------------|---------------|---------------|---------------|
| $E_{\text{Region2}}$                                     | -340.21          | -454.15          | -437.21          |               |               |               |
| $\Delta\Delta E_{\text{Prep}}$                           |                  |                  |                  | -113.94       | 16.94         | -97.00        |
| $\Delta(\Delta E_{\text{Int}} + \Delta E_{\text{Prep}})$ |                  |                  |                  | <b>271.68</b> | <b>-19.14</b> | <b>252.54</b> |
| <b>SiF<sub>4</sub>, heterolytic fragmentation</b>        |                  |                  |                  |               |               |               |
| $\Delta E_{\text{Pauli}}$                                | 957.79           | 961.89           | 831.47           | 4.10          | -130.42       | -126.32       |
| $\Delta E_{\text{Coul}}$                                 | -10558.30        | -10406.27        | -10370.15        | 152.03        | 36.12         | 188.15        |
| $\Delta E_{\text{Orb}}$                                  | -4277.92         | -4317.10         | -4182.45         | -39.18        | 134.65        | 95.47         |
| $\Delta E_{\text{Disp}}$                                 | -5.81            | -5.84            | -5.86            | -0.03         | -0.02         | -0.05         |
| $\Delta E_{\text{Int}}$                                  | <b>-13884.24</b> | <b>-13767.32</b> | <b>-13726.99</b> | <b>116.92</b> | <b>40.33</b>  | <b>157.25</b> |
| $E_{\text{Region2}}$                                     | 1219.45          | 1374.23          | 1314.75          |               |               |               |
| $\Delta\Delta E_{\text{Prep}}$                           |                  |                  |                  | 154.78        | -59.48        | 95.30         |
| $\Delta(\Delta E_{\text{Int}} + \Delta E_{\text{Prep}})$ |                  |                  |                  | <b>271.70</b> | <b>-19.15</b> | <b>252.55</b> |

### Fragmentation of one bond versus all four bonds

The influence of the chosen fragmentation scheme was considered with regard to whether all four bonds or only one bond is heterolytically dissected during the EDA.

**Table S15:** Results of the energy decomposition analyses (BP86-D3(BJ)/QZ4P) of the ground state (GS) and the inversion transition state (TS) of SiH<sub>4</sub> and SiF<sub>4</sub> with respect to one bond or four bond fragmentation. All numbers are given in kJ mol<sup>-1</sup>.

|                                                          | <b>GS</b>        | <b>TS</b>        | <b>Total<br/>(TS – GS)</b> |
|----------------------------------------------------------|------------------|------------------|----------------------------|
| <b>SiH<sub>4</sub>, one bond fragmentation</b>           |                  |                  |                            |
| $\Delta E_{\text{Pauli}}$                                | 748.94           | 995.58           | 246.64                     |
| $\Delta E_{\text{Coul}}$                                 | -1124.99         | -1112.10         | 12.89                      |
| $\Delta E_{\text{Orb}}$                                  | -810.91          | -762.14          | 48.77                      |
| $\Delta E_{\text{Disp}}$                                 | -1.42            | -1.40            | 0.02                       |
| $\Delta E_{\text{Int}}$                                  | <b>-1188.38</b>  | <b>-880.06</b>   | <b>308.32</b>              |
| $E_{\text{Region2}}$                                     | -445.99          | -389.35          | 56.64                      |
| $\Delta(\Delta E_{\text{Int}} + \Delta E_{\text{Prep}})$ |                  |                  | <b>364.96</b>              |
| <b>SiH<sub>4</sub>, four bond fragmentation</b>          |                  |                  |                            |
| $\Delta E_{\text{Pauli}}$                                | 692.03           | 582.43           | -109.6                     |
| $\Delta E_{\text{Coul}}$                                 | -7847.32         | -7795.30         | 52.02                      |
| $\Delta E_{\text{Orb}}$                                  | -6241.34         | -5872.73         | 368.61                     |
| $\Delta E_{\text{Disp}}$                                 | -3.61            | -3.82            | -0.21                      |
| $\Delta E_{\text{Int}}$                                  | <b>-13400.24</b> | <b>-13089.42</b> | <b>310.82</b>              |
| $E_{\text{Region2}}$                                     | 1658.76          | 1712.9           | 54.14                      |
| $\Delta(\Delta E_{\text{Int}} + \Delta E_{\text{Prep}})$ |                  |                  | <b>364.96</b>              |
| <b>SiF<sub>4</sub>, one bond fragmentation</b>           |                  |                  |                            |
| $\Delta E_{\text{Pauli}}$                                | 769.14           | 871.27           | 102.13                     |
| $\Delta E_{\text{Coul}}$                                 | -1504.84         | -1487.90         | 16.94                      |
| $\Delta E_{\text{Orb}}$                                  | -587.14          | -587.64          | -0.50                      |
| $\Delta E_{\text{Disp}}$                                 | -2.55            | -2.46            | 0.09                       |
| $\Delta E_{\text{Int}}$                                  | <b>-1325.39</b>  | <b>-1206.73</b>  | <b>118.66</b>              |
| $E_{\text{Region2}}$                                     | -1005.04         | -871.19          | 133.85                     |
| $\Delta(\Delta E_{\text{Int}} + \Delta E_{\text{Prep}})$ |                  |                  | <b>252.51</b>              |
| <b>SiF<sub>4</sub>, four bond fragmentation</b>          |                  |                  |                            |
| $\Delta E_{\text{Pauli}}$                                | 957.79           | 831.47           | -126.32                    |
| $\Delta E_{\text{Coul}}$                                 | -10558.3         | -10370.15        | 188.15                     |

|                                                          |                  |                  |               |
|----------------------------------------------------------|------------------|------------------|---------------|
| $\Delta E_{\text{Orb}}$                                  | -4277.92         | -4182.45         | 95.47         |
| $\Delta E_{\text{Disp}}$                                 | -5.81            | -5.86            | -0.05         |
| $\Delta E_{\text{Int}}$                                  | <b>-13884.24</b> | <b>-13726.99</b> | <b>157.25</b> |
| $E_{\text{Region2}}$                                     | 1219.45          | 1314.75          | 95.30         |
| $\Delta(\Delta E_{\text{Int}} + \Delta E_{\text{Prep}})$ |                  |                  | <b>252.55</b> |

## S16. References

1. F. Neese, *Wiley Interdiscip. Rev. Comput. Mol. Sci.*, 2012, **2**, 73-78.
2. F. Neese, *Wiley Interdiscip. Rev. Comput. Mol. Sci.*, 2018, **8**, e1327.
3. E. J. Baerends, T. Ziegler, A. J. Atkins, J. Autschbach, D. Bashford, O. Baseggio, A. Brces, F. M. Bickelhaupt, C. Bo, P. M. Boerrigter, L. Cavallo, C. Daul, D. P. Chong, D. V. Chulhai, L. Deng, R. M. Dickson, J. M. Dieterich, D. E. Ellis, M. van Faassen, A. Ghysels, A. Giammona, S. J. A. van Gisbergen, A. Goetz, A. W. Gtz, S. Gusarov, F. E. Harris, P. van den Hoek, Z. Hu, C. R. Jacob, H. Jacobsen, L. Jensen, L. Joubert, J. W. Kaminski, G. van Kessel, C. Knig, F. Kootstra, A. Kovalenko, M. Krykunov, E. van Lenthe, D. A. McCormack, A. M. Michalak, M., S. M. Morton, J. Neugebauer, V. P. Nicu, L. Noodleman, V. P. Osinga, S. Patchkovskii, M. Pavanello, C. A. Peeples, P. H. T. Philipsen, D. Post, C. C. Pye, H. Ramanantoanina, P. Ramos, W. Ravenek, J. I. Rodriguez, P. Ros, R. Rger, P. R. T. Schipper, D. Schlms, H. van Schoot, G. Schreckenbach, J. S. Seldenthuis, M. Seth and J. G. Snijders, *Journal, SCM, Theoretical Chemistry, Vrije Universiteit, Amsterdam, The Netherlands*, <https://www.scm.com>, **ADF2019.103**.
4. G. A. Andrienko, *Journal*, <https://www.chemcraftprog.com>, **Chemcraft 1.8**.
5. S. Grimme, J. Antony, S. Ehrlich and H. Krieg, *J. Chem. Phys.*, 2010, **132**, 154104.
6. S. Grimme, S. Ehrlich and L. Goerigk, *J. Comput. Chem.*, 2011, **32**, 1456-1465.
7. N. Mardirossian and M. Head-Gordon, *J. Chem. Phys.*, 2015, **142**, 074111.
8. A. Najibi and L. Goerigk, *J. Chem. Theory Comput.*, 2018, **14**, 5725-5738.
9. T. H. D. Jr., *J. Chem. Phys.*, 1989, **90**, 1007-1023.
10. D. E. Woon and T. H. D. Jr., *J. Chem. Phys.*, 1993, **98**, 1358-1371.
11. A. K. Wilson, D. E. Woon, K. A. Peterson and T. H. D. Jr., *J. Chem. Phys.*, 1999, **110**, 7667-7676.
12. K. A. Peterson, B. C. Shepler, D. Figgen and H. Stoll, *J. Phys. Chem. A*, 2006, **110**, 13877-13883.
13. F. Neese, A. Hansen and D. G. Liakos, *J. Chem. Phys.*, 2009, **131**, 064103.
14. C. Riplinger and F. Neese, *J. Chem. Phys.*, 2013, **138**, 034106.
15. C. Riplinger, B. Sandhoefer, A. Hansen and F. Neese, *J. Chem. Phys.*, 2013, **139**, 134101.
16. C. Riplinger, P. Pinski, U. Becker, E. F. Valeev and F. Neese, *J. Chem. Phys.*, 2016, **144**, 024109.
17. G. L. Stoychev, A. A. Auer and F. Neese, *J. Chem. Theory Comput.*, 2017, **13**, 554-562.
18. C. Adamo and V. Barone, *J. Chem. Phys.*, 1999, **110**, 6158-6170.
19. F. Weigend and R. Ahlrichs, *Phys. Chem. Chem. Phys.*, 2005, **7**, 3297-3305.
20. L. Zhao, M. von Hopffgarten, D. M. Andrada and G. Frenking, *Wiley Interdiscip. Rev. Comput. Mol. Sci.*, 2018, **8**, e1345.
21. M. v. Hopffgarten and G. Frenking, *Wiley Interdiscip. Rev. Comput. Mol. Sci.*, 2012, **2**, 43-62.
22. T. Ziegler and A. Rauk, *Theor. Chem. Acc.*, 1977, **46**, 1-10.
23. A. D. Becke, *Phys Rev A*, 1988, **38**, 3098-3100.
24. E. Van Lenthe and E. J. Baerends, *J. Comput. Chem.*, 2003, **24**, 1142-1156.
25. E. v. Lenthe, E. J. Baerends and J. G. Snijders, *J. Chem. Phys.*, 1993, **99**, 4597-4610.
26. AIMAll (Version 19.10.12), Todd A. Keith, TK Gristmill Software, Overland Park KS, USA, 2019 ([aim.tkgristmill.com](http://aim.tkgristmill.com))
27. B. O. Roos, P. R. Taylor and P. E. M. Sigbahn, *Chem. Phys.*, 1980, **48**, 157-173.
28. C. Angeli, B. Bories, A. Cavallini and R. Cimraglia, *J. Chem. Phys.*, 2006, **124**, 054108.
29. C. Angeli, R. Cimraglia, S. Evangelisti, T. Leininger and J.-P. Malrieu, *J. Chem. Phys.*, 2001, **114**, 10252-10264.
30. C. Angeli, R. Cimraglia and J.-P. Malrieu, *Chem. Phys. Lett.*, 2001, **350**, 297-305.
31. C. Angeli, R. Cimraglia and J.-P. Malrieu, *J. Chem. Phys.*, 2002, **117**, 9138-9153.
32. F. Neese and E. F. Valeev, *J. Chem. Theo. Comp.*, 2011, **7**, 33-43.
